# Supplementary material for: Investigation of a Limited but Explosive COVID-19 Outbreak in a German Secondary School
Source: MDPI journal article supplement (doi:10.3390/v14010087), 2022-01-04
Supplement: s1 [file s1]

We gratefully acknowledge the following Authors from the Originating laboratories responsible for obtaining the specimens, as well as the Submitting laboratories where the genome data were generated and shared via GISAID, on which this research is based.

All Submitters of data may be contacted directly via [www.gisaid.org](http://www.gisaid.org)

Authors are sorted alphabetically.

| Accession ID                                                                                                                                                                                                                                                                                                                                                                                                                                                                                                                                                                                                                                                                                                                                                                                                                                                                                                                                                                                                                                                                                                                                                                                                                                                                                   | Originating Laboratory                                                                                                                                                                                                                                                                                                                                                                                                                                                                                                                                                                                                                                                                                                                                                                                                                                                                                                                                                                                                                                                                                                                     | Submitting Laboratory                                                                                                                                                                                              | Authors                                                                                                                                                                                                                                                                                                                                                                                                                         |
|------------------------------------------------------------------------------------------------------------------------------------------------------------------------------------------------------------------------------------------------------------------------------------------------------------------------------------------------------------------------------------------------------------------------------------------------------------------------------------------------------------------------------------------------------------------------------------------------------------------------------------------------------------------------------------------------------------------------------------------------------------------------------------------------------------------------------------------------------------------------------------------------------------------------------------------------------------------------------------------------------------------------------------------------------------------------------------------------------------------------------------------------------------------------------------------------------------------------------------------------------------------------------------------------|--------------------------------------------------------------------------------------------------------------------------------------------------------------------------------------------------------------------------------------------------------------------------------------------------------------------------------------------------------------------------------------------------------------------------------------------------------------------------------------------------------------------------------------------------------------------------------------------------------------------------------------------------------------------------------------------------------------------------------------------------------------------------------------------------------------------------------------------------------------------------------------------------------------------------------------------------------------------------------------------------------------------------------------------------------------------------------------------------------------------------------------------|--------------------------------------------------------------------------------------------------------------------------------------------------------------------------------------------------------------------|---------------------------------------------------------------------------------------------------------------------------------------------------------------------------------------------------------------------------------------------------------------------------------------------------------------------------------------------------------------------------------------------------------------------------------|
| EPI_ISL_1410761                                                                                                                                                                                                                                                                                                                                                                                                                                                                                                                                                                                                                                                                                                                                                                                                                                                                                                                                                                                                                                                                                                                                                                                                                                                                                | 1. Główny Inspektorat Sanitarny; 2. Diagnostyka. Laboratoria Medyczne.                                                                                                                                                                                                                                                                                                                                                                                                                                                                                                                                                                                                                                                                                                                                                                                                                                                                                                                                                                                                                                                                     | 1. ViroGenetics - BSL3 Laboratory of Virology, Malopolska Centre of Biotechnology, Jagiellonian University; 2. genXone SA, Research & Development Laboratory                                                       | Aleksandra Gidlewicz; Anna Brylak; Gromowski, T.; Grzegorz Nowicki; Jakub Grabowski; Karol Szeszko; Kowalski, M.; Labaj; Lukasz Krych; Maciej Sykuluski; Mazur-Panasiuk, N.; Michal Kaszuba; Natalia Drweska-Matelska; P.P.; Pyrc, K.; Sylwia Januszcza; Szulc, P.                                                                                                                                                              |
| EPI_ISL_1265418                                                                                                                                                                                                                                                                                                                                                                                                                                                                                                                                                                                                                                                                                                                                                                                                                                                                                                                                                                                                                                                                                                                                                                                                                                                                                | 1. Wojewódzka Stacja Sanitarno - Epidemiologiczna w Katowicach (WSSE Katowice); 2. Wojewódzka Stacja Sanitarno - Epidemiologiczna w Kielcach (WSSE Kielce); 3. Wojewódzka Stacja Sanitarno - Epidemiologiczna w Szczecinie (WSSE Szczecin); 4. Wojewódzka Stacja Sanitarno - Epidemiologiczna w Lublinie (WSSE Lublin); 5. Wojewódzka Stacja Sanitarno - Epidemiologiczna w Gorzowie Wielkopolskim (WSSE Gorzów Wielkopolski); 6. Wojewódzka Stacja Sanitarno-Epidemiologiczna w Gdańsku (WSSE Gdańsk); 7. Wojewódzka Stacja Sanitarno-Epidemiologiczna w Poznaniu (WSSE Poznań); 8. Wojewódzka Stacja Sanitarno-Epidemiologiczna w Opolu (WSSE Opole); 9. Wojewódzka Stacja Sanitarno-Epidemiologiczna we Wrocławiu (WSSE Wrocław); 10. Wojewódzka Stacja Sanitarno-Epidemiologiczna w Krakowie (WSSE Kraków); 11. Wojewódzka Stacja Sanitarno-Epidemiologiczna w Olsztynie (WSSE Olsztyn); 12. Wojewódzka Stacja Sanitarno-Epidemiologiczna w Bydgoszczy (WSSE Bydgoszcz); 13. Wojewódzka Stacja Sanitarno-Epidemiologiczna w Rzeszowie (WSSE Rzeszów); 14. Wojewódzka Stacja Sanitarno-Epidemiologiczna w Białymstoku (WSSE Białystok); | 1. ViroGenetics - BSL3 Laboratory of Virology, Malopolska Centre of Biotechnology, Jagiellonian University; 2. Human Genome Variation Research Group, Malopolska Centre of Biotechnology, Jagiellonian University; | Branicki, W.; Gromowski, T.; Klajmon, A.; Kowalski, M.; Labaj; Marszalek, K.; Mazur-Panasiuk, N.; P.P.; Pyrc, K.; Szulc, P.                                                                                                                                                                                                                                                                                                     |
| EPI_ISL_1166073                                                                                                                                                                                                                                                                                                                                                                                                                                                                                                                                                                                                                                                                                                                                                                                                                                                                                                                                                                                                                                                                                                                                                                                                                                                                                | 24023 PLATEFORME MGI COVID                                                                                                                                                                                                                                                                                                                                                                                                                                                                                                                                                                                                                                                                                                                                                                                                                                                                                                                                                                                                                                                                                                                 | CNR Virus des Infections Respiratoires - France SUD                                                                                                                                                                | Antonin Bal; Bruno Lina; Gregory Destras; Gwendolyne Burfin; Hadrien Regue; Laurence Josset; Martine Valette; Quentin Semanas                                                                                                                                                                                                                                                                                                   |
| EPI_ISL_1840895                                                                                                                                                                                                                                                                                                                                                                                                                                                                                                                                                                                                                                                                                                                                                                                                                                                                                                                                                                                                                                                                                                                                                                                                                                                                                | 3. Medizinische Abteilung, Hanusch Krankenhaus                                                                                                                                                                                                                                                                                                                                                                                                                                                                                                                                                                                                                                                                                                                                                                                                                                                                                                                                                                                                                                                                                             | Bergthaler laboratory, CeMM Research Center for Molecular Medicine of the Austrian Academy of Sciences                                                                                                             | Andreas Bergthaler; Anna Schedl; Bekir Erguner; Benedikt Agerer; Christoph Bock; Fabian Amman; Jan Laine; Lukas Endler; Maelle Le Moing; Martin Senekowitsch; Michael Schuster; Petr Triska; Thomas Penz                                                                                                                                                                                                                        |
| EPI_ISL_729733                                                                                                                                                                                                                                                                                                                                                                                                                                                                                                                                                                                                                                                                                                                                                                                                                                                                                                                                                                                                                                                                                                                                                                                                                                                                                 | A. Krumbholz, Labor Dr. Krause und Kollegen MVZ GmbH, Kiel                                                                                                                                                                                                                                                                                                                                                                                                                                                                                                                                                                                                                                                                                                                                                                                                                                                                                                                                                                                                                                                                                 | Charité Universitätsmedizin Berlin, Institut für Virologie                                                                                                                                                         | Barbara Mühlemann; Christian Drosten; Julia Schneider; Jörn Beheim-Schwarzbach; Talitha Veith; Terry Jones; Victor M Corman                                                                                                                                                                                                                                                                                                     |
| EPI_ISL_2359205                                                                                                                                                                                                                                                                                                                                                                                                                                                                                                                                                                                                                                                                                                                                                                                                                                                                                                                                                                                                                                                                                                                                                                                                                                                                                | ADMED                                                                                                                                                                                                                                                                                                                                                                                                                                                                                                                                                                                                                                                                                                                                                                                                                                                                                                                                                                                                                                                                                                                                      | Laboratory of genomics and metagenomics                                                                                                                                                                            | Claire Bertelli; Damien Jacot; Gilbert Greub; Sébastien Aeb; Trestan Pillonel                                                                                                                                                                                                                                                                                                                                                   |
| EPI_ISL_2491572                                                                                                                                                                                                                                                                                                                                                                                                                                                                                                                                                                                                                                                                                                                                                                                                                                                                                                                                                                                                                                                                                                                                                                                                                                                                                | Akershus University Hospital, Department for Microbiology and Infectious Disease Control                                                                                                                                                                                                                                                                                                                                                                                                                                                                                                                                                                                                                                                                                                                                                                                                                                                                                                                                                                                                                                                   | Norwegian Institute of Public Health, Department of Virology                                                                                                                                                       | Atiya R Ali; Debec Nadia; Engebretsen Serina Beate; Garcia Llorente Ignacio; Hilde Elshaug; Hilde Vollan; Jon Bråte; Kamilla Heddeland Instefjord; Karoline Bragstad; Kathrine Stene-Johansen; Line Victoria Moen; Marie Paulsen Madsen; Olav Hungnes; Pedersen Benedikte Nevjen; Rasmus Riis Kopperud                                                                                                                          |
| EPI_ISL_2158333                                                                                                                                                                                                                                                                                                                                                                                                                                                                                                                                                                                                                                                                                                                                                                                                                                                                                                                                                                                                                                                                                                                                                                                                                                                                                | Alab Laboratoria Sp. z o.o.                                                                                                                                                                                                                                                                                                                                                                                                                                                                                                                                                                                                                                                                                                                                                                                                                                                                                                                                                                                                                                                                                                                | 1. National Institute of Public Health - National Institute of Hygiene; 2. Eurofins Genomics Europe Sequencing GmbH                                                                                                | ECDC COVID-19 WGS support team; Eurofins Genomics Europe Sequencing Team; Gierczyński Rafał; Sadkowska-Todys Małgorzata; Wolkowicz Tomasz; Zacharczuk Katarzyna                                                                                                                                                                                                                                                                 |
| EPI_ISL_1008167                                                                                                                                                                                                                                                                                                                                                                                                                                                                                                                                                                                                                                                                                                                                                                                                                                                                                                                                                                                                                                                                                                                                                                                                                                                                                | Austrian Agency for Health and Food Safety (AGES)                                                                                                                                                                                                                                                                                                                                                                                                                                                                                                                                                                                                                                                                                                                                                                                                                                                                                                                                                                                                                                                                                          | Bergthaler laboratory, CeMM Research Center for Molecular Medicine of the Austrian Academy of Sciences                                                                                                             | Andreas Bergthaler; Anna Schedl; Bekir Erguner; Benedikt Agerer; Christoph Bock; Jan Laine; Lukas Endler; Maelle Le Moing; Martin Senekowitsch; Michael Schuster; Thomas Penz                                                                                                                                                                                                                                                   |
| EPI_ISL_1185839, EPI_ISL_1222806                                                                                                                                                                                                                                                                                                                                                                                                                                                                                                                                                                                                                                                                                                                                                                                                                                                                                                                                                                                                                                                                                                                                                                                                                                                               | Azienda Sanitaria dell'Alto Adige Laboratorio Aziendale di Microbiologia e Virologia                                                                                                                                                                                                                                                                                                                                                                                                                                                                                                                                                                                                                                                                                                                                                                                                                                                                                                                                                                                                                                                       | Istituto di Genomica Applicata                                                                                                                                                                                     | Davide Scaglione; Eleonora Paparelli; Elisa Masi; Elisabetta Giacobazzi; Elisabetta Pagani; Gabriele Magris; Irena Jurman; Irene Bianconi; Michele Morgante; Stefanie Wieser; Vera Vendramin                                                                                                                                                                                                                                    |
| EPI_ISL_529217                                                                                                                                                                                                                                                                                                                                                                                                                                                                                                                                                                                                                                                                                                                                                                                                                                                                                                                                                                                                                                                                                                                                                                                                                                                                                 | Beijing Institute of Microbiology and Epidemiology                                                                                                                                                                                                                                                                                                                                                                                                                                                                                                                                                                                                                                                                                                                                                                                                                                                                                                                                                                                                                                                                                         | Beijing Institute of Microbiology and Epidemiology                                                                                                                                                                 | Cui, Y.; Fan; Guo, Y.; Hang; Hou, J.; Li, B.; Mi, Z.; Mu, J.; Qin, E.; Song; Teng; Wu, Y.; Xu, Z.; Yajun.; Yang, R.; Yong, Y.; Yue; Zhang, X.                                                                                                                                                                                                                                                                                   |
| EPI_ISL_2128588                                                                                                                                                                                                                                                                                                                                                                                                                                                                                                                                                                                                                                                                                                                                                                                                                                                                                                                                                                                                                                                                                                                                                                                                                                                                                | Bioinformatics and Biostatistics Lab, Advanced Sequencing Facility                                                                                                                                                                                                                                                                                                                                                                                                                                                                                                                                                                                                                                                                                                                                                                                                                                                                                                                                                                                                                                                                         | COVID-19 Genomics UK (COG-UK) Consortium                                                                                                                                                                           | Aengus Stewart; Chelsea Sawyer; Harshil Patel; Jerome Nicod; Laura Cubitt; Margaret Crawford                                                                                                                                                                                                                                                                                                                                    |
| EPI_ISL_2270072, EPI_ISL_2270076                                                                                                                                                                                                                                                                                                                                                                                                                                                                                                                                                                                                                                                                                                                                                                                                                                                                                                                                                                                                                                                                                                                                                                                                                                                               | Biolityx AG                                                                                                                                                                                                                                                                                                                                                                                                                                                                                                                                                                                                                                                                                                                                                                                                                                                                                                                                                                                                                                                                                                                                | Clinical Bacteriology                                                                                                                                                                                              | Adrian Egli; Alfredo Mari; Hans Hirsch; Helena MB Seth-Smith; Julia Bielecki; Karoline Leuzinger; Madlen Stange; Manuel Battegay; Tim Roloff                                                                                                                                                                                                                                                                                    |
| see above                                                                                                                                                                                                                                                                                                                                                                                                                                                                                                                                                                                                                                                                                                                                                                                                                                                                                                                                                                                                                                                                                                                                                                                                                                                                                      | Biopathology - Clinical Microbiology, Department Clinical and Laboratory Research, University of Thessaly                                                                                                                                                                                                                                                                                                                                                                                                                                                                                                                                                                                                                                                                                                                                                                                                                                                                                                                                                                                                                                  | Greek Genome Center, Biomedical Research Foundation of the Academy of Athens (BRFAA)                                                                                                                               | Dimitrios Thanos; Efthimia Petinaki; Emmanouil Athanasiadis; Giannis Vatsellas; Katerina Zoi; Theodoros Loupis                                                                                                                                                                                                                                                                                                                  |
| EPI_ISL_1141449, EPI_ISL_1211312, EPI_ISL_1216253, EPI_ISL_1843063, EPI_ISL_1848742                                                                                                                                                                                                                                                                                                                                                                                                                                                                                                                                                                                                                                                                                                                                                                                                                                                                                                                                                                                                                                                                                                                                                                                                            | Bioscientia Labor Wermsdorf                                                                                                                                                                                                                                                                                                                                                                                                                                                                                                                                                                                                                                                                                                                                                                                                                                                                                                                                                                                                                                                                                                                | Robert Koch Institute                                                                                                                                                                                              |                                                                                                                                                                                                                                                                                                                                                                                                                                 |
| EPI_ISL_1843558, EPI_ISL_1843635, EPI_ISL_1843691, EPI_ISL_1847302, EPI_ISL_1848685, EPI_ISL_2109326                                                                                                                                                                                                                                                                                                                                                                                                                                                                                                                                                                                                                                                                                                                                                                                                                                                                                                                                                                                                                                                                                                                                                                                           | Bioscientia MVZ Labor Karlsruhe GmbH                                                                                                                                                                                                                                                                                                                                                                                                                                                                                                                                                                                                                                                                                                                                                                                                                                                                                                                                                                                                                                                                                                       | Robert Koch Institute                                                                                                                                                                                              |                                                                                                                                                                                                                                                                                                                                                                                                                                 |
| EPI_ISL_732531, EPI_ISL_732532, EPI_ISL_732534, EPI_ISL_732535, EPI_ISL_732536, EPI_ISL_732537, EPI_ISL_732538, EPI_ISL_732539, EPI_ISL_732540, EPI_ISL_732541, EPI_ISL_732544, EPI_ISL_732550, EPI_ISL_732551, EPI_ISL_732553, EPI_ISL_732554, EPI_ISL_732555, EPI_ISL_732556, EPI_ISL_732557, EPI_ISL_732558, EPI_ISL_732559, EPI_ISL_732561, EPI_ISL_732564, EPI_ISL_732658                                                                                                                                                                                                                                                                                                                                                                                                                                                                                                                                                                                                                                                                                                                                                                                                                                                                                                                 | Bundeswehr Institute of Microbiology                                                                                                                                                                                                                                                                                                                                                                                                                                                                                                                                                                                                                                                                                                                                                                                                                                                                                                                                                                                                                                                                                                       | Bundeswehr Institute of Microbiology                                                                                                                                                                               | Alexandra Rehn; Elham Khatamzas; Enrico Georgi; Malena Bestehorn-Willmann; Markus Antwerpen; Mathias Walter; Michael von Bergwelt-Baildon; Roman Wölfel; Sabine Zange                                                                                                                                                                                                                                                           |
| EPI_ISL_1833975                                                                                                                                                                                                                                                                                                                                                                                                                                                                                                                                                                                                                                                                                                                                                                                                                                                                                                                                                                                                                                                                                                                                                                                                                                                                                | Bundeswehrzentralrankenhaus Koblenz                                                                                                                                                                                                                                                                                                                                                                                                                                                                                                                                                                                                                                                                                                                                                                                                                                                                                                                                                                                                                                                                                                        | Bundeswehr Institute of Microbiology                                                                                                                                                                               | Alexandra Rehn; Enrico Georgi; Malena Bestehorn-Willmann; Markus Antwerpen; Mathias Walter; Mike Pillukat; Roman Wölfel; Sabine Zange                                                                                                                                                                                                                                                                                           |
| EPI_ISL_1322387                                                                                                                                                                                                                                                                                                                                                                                                                                                                                                                                                                                                                                                                                                                                                                                                                                                                                                                                                                                                                                                                                                                                                                                                                                                                                | C.H.R.U. MONTPIED                                                                                                                                                                                                                                                                                                                                                                                                                                                                                                                                                                                                                                                                                                                                                                                                                                                                                                                                                                                                                                                                                                                          | CNR Virus des Infections Respiratoires - France SUD                                                                                                                                                                | Antonin Bal; Bruno Lina; Gregory Destras; Gwendolyne Burfin; Hadrien Regue; Laurence Josset; Martine Valette; Quentin Semanas                                                                                                                                                                                                                                                                                                   |
| EPI_ISL_1757728                                                                                                                                                                                                                                                                                                                                                                                                                                                                                                                                                                                                                                                                                                                                                                                                                                                                                                                                                                                                                                                                                                                                                                                                                                                                                | CH. CLEMENCEAU                                                                                                                                                                                                                                                                                                                                                                                                                                                                                                                                                                                                                                                                                                                                                                                                                                                                                                                                                                                                                                                                                                                             | Department of Virology, Henri Mondor University Hospital, Assistance Publique Hôpitaux de Paris, Université Paris-Est Créteil, INSERM U955                                                                         | Alexandre Soulier; Christophe Rodriguez; Elisabeth Trawinski; Guillaume Gricourt; Jean-Michel Pawlowski; Melissa N'Debi; Slim Fourati; Vanessa Demontant                                                                                                                                                                                                                                                                        |
| EPI_ISL_2278673, EPI_ISL_2351581                                                                                                                                                                                                                                                                                                                                                                                                                                                                                                                                                                                                                                                                                                                                                                                                                                                                                                                                                                                                                                                                                                                                                                                                                                                               | CHU Purpan - Laboratoire de Virologie - Institut Fédératif de Biologie                                                                                                                                                                                                                                                                                                                                                                                                                                                                                                                                                                                                                                                                                                                                                                                                                                                                                                                                                                                                                                                                     | CHU Purpan - Laboratoire de Virologie - Institut Fédératif de Biologie                                                                                                                                             | Bulach T.; Donnadiou C.; Izopet J.; Latour J.; Milhes M.; Nicot F.; Ranger N.; Salin G.; Tremeaux P.                                                                                                                                                                                                                                                                                                                            |
| EPI_ISL_2359198, EPI_ISL_2359470, EPI_ISL_2359478                                                                                                                                                                                                                                                                                                                                                                                                                                                                                                                                                                                                                                                                                                                                                                                                                                                                                                                                                                                                                                                                                                                                                                                                                                              | CHUV                                                                                                                                                                                                                                                                                                                                                                                                                                                                                                                                                                                                                                                                                                                                                                                                                                                                                                                                                                                                                                                                                                                                       | Laboratory of genomics and metagenomics                                                                                                                                                                            | Claire Bertelli; Damien Jacot; Gilbert Greub; Sébastien Aeb; Trestan Pillonel                                                                                                                                                                                                                                                                                                                                                   |
| EPI_ISL_1908193                                                                                                                                                                                                                                                                                                                                                                                                                                                                                                                                                                                                                                                                                                                                                                                                                                                                                                                                                                                                                                                                                                                                                                                                                                                                                | CONSEJERIA DE SANIDAD Y ASUNTOS SOCIALES                                                                                                                                                                                                                                                                                                                                                                                                                                                                                                                                                                                                                                                                                                                                                                                                                                                                                                                                                                                                                                                                                                   | Instituto de Salud Carlos III                                                                                                                                                                                      | A. Monzón; F. Casas; GONZALO; I. GUTIERREZ AVILA; I. Jiménez; M. Camarero; P. Zaballos; S. Cuesta; S. Iglesias-Caballero; S. Pozo; S. Varona; Sandomis; V. Vázquez-Morón                                                                                                                                                                                                                                                        |
| EPI_ISL_523950                                                                                                                                                                                                                                                                                                                                                                                                                                                                                                                                                                                                                                                                                                                                                                                                                                                                                                                                                                                                                                                                                                                                                                                                                                                                                 | Center of Medical Microbiology, Virology, and Hospital Hygiene, University of Duesseldorf                                                                                                                                                                                                                                                                                                                                                                                                                                                                                                                                                                                                                                                                                                                                                                                                                                                                                                                                                                                                                                                  | Center of Medical Microbiology, Virology, and Hospital Hygiene, Heinrich Heine University Düsseldorf                                                                                                               | Alexander Dilthey; Andreas Walker; Daniel Strelow; Hendrik Strecek; Jessica Nicolai; Jörg Timm; Klaus Pfeffer; Malte Kohns Vasconcelos; Marek Korenca; Maximilian Damagnez; Tobias Wienemann; Torsten Houwaart                                                                                                                                                                                                                  |
| EPI_ISL_413488, EPI_ISL_414497, EPI_ISL_414498, EPI_ISL_414499, EPI_ISL_414504, EPI_ISL_414505, EPI_ISL_414506, EPI_ISL_414508, EPI_ISL_414509, EPI_ISL_414574, EPI_ISL_417459, EPI_ISL_417462, EPI_ISL_419546, EPI_ISL_425126, EPI_ISL_425131, EPI_ISL_523937, EPI_ISL_523946, EPI_ISL_523947, EPI_ISL_523948, EPI_ISL_602515, EPI_ISL_602533, EPI_ISL_602536, EPI_ISL_602539, EPI_ISL_832366,                                                                                                                                                                                                                                                                                                                                                                                                                                                                                                                                                                                                                                                                                                                                                                                                                                                                                                | Center of Medical Microbiology, Virology, and Hospital Hygiene, University of Duesseldorf                                                                                                                                                                                                                                                                                                                                                                                                                                                                                                                                                                                                                                                                                                                                                                                                                                                                                                                                                                                                                                                  | Center of Medical Microbiology, Virology, and Hospital Hygiene, University of Duesseldorf                                                                                                                          | Alexander Dilthey; Andreas Walker; Ashley-Jane Duplessis; Bjorn-Erik Jensen; Björn-Erik Jensen; Daniel Strelow; Detlef Kindgen-Milles; Hendrik Strecek; Jessica Nicolai; Jörg Timm; Jörg Timm; Klaus Pfeffer; Lisanna Hülse; Malte Kohns Vasconcelos; Marcel Andree; Marek Korenca; Maximilian Damagnez; Nadine Lübke; Ortwim Adams; Sandra Hauka; Teresa Tamayo; Tina Senff; Tobias Wienemann; Torsten Feldt; Torsten Houwaart |
| see above                                                                                                                                                                                                                                                                                                                                                                                                                                                                                                                                                                                                                                                                                                                                                                                                                                                                                                                                                                                                                                                                                                                                                                                                                                                                                      | Center of Medical Microbiology, Virology, and Hospital Hygiene, University of Duesseldorf                                                                                                                                                                                                                                                                                                                                                                                                                                                                                                                                                                                                                                                                                                                                                                                                                                                                                                                                                                                                                                                  | Center of Medical Microbiology, Virology, and Hospital Hygiene, University of Duesseldorf                                                                                                                          | Alexander Dilthey; Andreas Walker; Ashley-Jane Duplessis; Bjorn-Erik Jensen; Björn-Erik Jensen; Daniel Strelow; Detlef Kindgen-Milles; Hendrik Strecek; Jessica Nicolai; Jörg Timm; Jörg Timm; Klaus Pfeffer; Lisanna Hülse; Malte Kohns Vasconcelos; Marcel Andree; Marek Korenca; Maximilian Damagnez; Nadine Lübke; Ortwim Adams; Sandra Hauka; Teresa Tamayo; Tina Senff; Tobias Wienemann; Torsten Feldt; Torsten Houwaart |
| EPI_ISL_815260, EPI_ISL_815261, EPI_ISL_815262, EPI_ISL_815264, EPI_ISL_815265, EPI_ISL_815266, EPI_ISL_815267, EPI_ISL_815268, EPI_ISL_815270, EPI_ISL_815271, EPI_ISL_815274, EPI_ISL_815275, EPI_ISL_815277, EPI_ISL_815281, EPI_ISL_815282, EPI_ISL_815284, EPI_ISL_815285, EPI_ISL_815286, EPI_ISL_815289, EPI_ISL_815290, EPI_ISL_815291, EPI_ISL_815293, EPI_ISL_815295, EPI_ISL_815296, EPI_ISL_815297, EPI_ISL_815299, EPI_ISL_815300, EPI_ISL_815301, EPI_ISL_815302, EPI_ISL_815304, EPI_ISL_815312, EPI_ISL_815313, EPI_ISL_815314, EPI_ISL_815315, EPI_ISL_815317, EPI_ISL_815321, EPI_ISL_815323, EPI_ISL_815324, EPI_ISL_815325, EPI_ISL_815327, EPI_ISL_815331, EPI_ISL_815332, EPI_ISL_815334, EPI_ISL_815336, EPI_ISL_815338, EPI_ISL_815339, EPI_ISL_815341, EPI_ISL_815342, EPI_ISL_815344, EPI_ISL_815346, EPI_ISL_815349, EPI_ISL_815350, EPI_ISL_815352, EPI_ISL_815353, EPI_ISL_815356, EPI_ISL_815357, EPI_ISL_815361, EPI_ISL_815364, EPI_ISL_815365, EPI_ISL_815366, EPI_ISL_815368, EPI_ISL_815369, EPI_ISL_815370, EPI_ISL_815371, EPI_ISL_815372, EPI_ISL_815373, EPI_ISL_815374, EPI_ISL_815376, EPI_ISL_815377, EPI_ISL_815379, EPI_ISL_815380, EPI_ISL_815381, EPI_ISL_815384, EPI_ISL_815385, EPI_ISL_815386, EPI_ISL_815387, EPI_ISL_815388, EPI_ISL_815389 | Center of Medical Microbiology, Virology, and Hospital Hygiene, University of Duesseldorf                                                                                                                                                                                                                                                                                                                                                                                                                                                                                                                                                                                                                                                                                                                                                                                                                                                                                                                                                                                                                                                  | Center of Medical Microbiology, Virology, and Hospital Hygiene, University of Duesseldorf                                                                                                                          | Alexander Dilthey; Andreas Walker; Ashley-Jane Duplessis; Bjorn-Erik Jensen; Björn-Erik Jensen; Daniel Strelow; Detlef Kindgen-Milles; Hendrik Strecek; Jessica Nicolai; Jörg Timm; Jörg Timm; Klaus Pfeffer; Lisanna Hülse; Malte Kohns Vasconcelos; Marcel Andree; Marek Korenca; Maximilian Damagnez; Nadine Lübke; Ortwim Adams; Sandra Hauka; Teresa Tamayo; Tina Senff; Tobias Wienemann; Torsten Feldt; Torsten Houwaart |
| see above                                                                                                                                                                                                                                                                                                                                                                                                                                                                                                                                                                                                                                                                                                                                                                                                                                                                                                                                                                                                                                                                                                                                                                                                                                                                                      | Centogene                                                                                                                                                                                                                                                                                                                                                                                                                                                                                                                                                                                                                                                                                                                                                                                                                                                                                                                                                                                                                                                                                                                                  | Centogene                                                                                                                                                                                                          | Krishna Kumar Kandaswamy; Peter Bauer; Vivi Hue-Trang Lieu                                                                                                                                                                                                                                                                                                                                                                      |
| EPI_ISL_457750, EPI_ISL_459962,                                                                                                                                                                                                                                                                                                                                                                                                                                                                                                                                                                                                                                                                                                                                                                                                                                                                                                                                                                                                                                                                                                                                                                                                                                                                | Centogene AG                                                                                                                                                                                                                                                                                                                                                                                                                                                                                                                                                                                                                                                                                                                                                                                                                                                                                                                                                                                                                                                                                                                               | Centogene AG                                                                                                                                                                                                       | Dr. Krishna Kumar Kandaswamy; Prof. Dr. Peter Bauer                                                                                                                                                                                                                                                                                                                                                                             |

|                                                                                                                                                                                                                                                                                                                                                                                                                                                                                                                                                                                                                                                                                                                                                                                                                                                                                                                                                                                                                                                                                                                                                                                                                                                                                                                                                                                                                                                                                                                                                                                                                                                                                                                                                                                                                                                                                                                                                                                                                                                                                                                                                                                                                                                                                                                                                                                                                                                                                                                                                                                                                                                                                                                                                                                                                                                                                                                                                                                                                                                                                                                                                                                                                                                                                                                                                                                                                                                                                                                                                                                                                                                                                                                                                                                                                                                                                                                                                                                                                                                                                                                                                                                                                                                                                                                                                                                                                                                                                                                                                                                                                                                                                                                                                                                                                                                                                                                                                                                                                                                                                                                                                                                                                                                                                                                                                                                                                                                                                                                                                                                                                                                                                                                                                                                                                                                                                                                                                                                                                                                                                                                                                                                                                                                                                                                                                                                                                                                                                                                                                                                                                                                                                                                                                                                                                                                                                                                                                                                                                                                                                                                                                                                                                                                                                                                                                                                                                                                                                                                                                                                                                                                                                                                                                                                                                                                                                                                                                                                                                                                                                                                                                                                                                                                                                                                                                                                                                                                                                                                                                                                                                                                                                                                                                                                                                                                                                                                                                                                                                                                                                                                                                                                                                                                                                                                                                                                                                                                                                                                                                                                                                                                                                                                                                                                                                                                                                                                                                                                                                                                                                                                                                                                                                                                                                                                                                                                                                                                                                                                                                                                                                                                                                                                                                                                                                                                                                                                                                                                                                                                                                                                                                                                                                                                                                                                                                                                                                                                                                                                                                                                                                                                                                                                                                                                                                                                                                                                                                                                                                                                                                                                                                                                                                                                                                                                                                                                                                                                                                                                                                                                                                                                                                                                                                                                                                                                                                                                                                                                                                                                                                                                                                                                                                                                                                                                                                                                                                                                                                                                                                                                                                                                                                                                                                                                                                                                                                                                                            |                                                                                                                                                                                              |                                                                                                                                                                        |                                                                                                                                                                                                                                                                                                                                                                                                                                                                                                                   |
|--------------------------------------------------------------------------------------------------------------------------------------------------------------------------------------------------------------------------------------------------------------------------------------------------------------------------------------------------------------------------------------------------------------------------------------------------------------------------------------------------------------------------------------------------------------------------------------------------------------------------------------------------------------------------------------------------------------------------------------------------------------------------------------------------------------------------------------------------------------------------------------------------------------------------------------------------------------------------------------------------------------------------------------------------------------------------------------------------------------------------------------------------------------------------------------------------------------------------------------------------------------------------------------------------------------------------------------------------------------------------------------------------------------------------------------------------------------------------------------------------------------------------------------------------------------------------------------------------------------------------------------------------------------------------------------------------------------------------------------------------------------------------------------------------------------------------------------------------------------------------------------------------------------------------------------------------------------------------------------------------------------------------------------------------------------------------------------------------------------------------------------------------------------------------------------------------------------------------------------------------------------------------------------------------------------------------------------------------------------------------------------------------------------------------------------------------------------------------------------------------------------------------------------------------------------------------------------------------------------------------------------------------------------------------------------------------------------------------------------------------------------------------------------------------------------------------------------------------------------------------------------------------------------------------------------------------------------------------------------------------------------------------------------------------------------------------------------------------------------------------------------------------------------------------------------------------------------------------------------------------------------------------------------------------------------------------------------------------------------------------------------------------------------------------------------------------------------------------------------------------------------------------------------------------------------------------------------------------------------------------------------------------------------------------------------------------------------------------------------------------------------------------------------------------------------------------------------------------------------------------------------------------------------------------------------------------------------------------------------------------------------------------------------------------------------------------------------------------------------------------------------------------------------------------------------------------------------------------------------------------------------------------------------------------------------------------------------------------------------------------------------------------------------------------------------------------------------------------------------------------------------------------------------------------------------------------------------------------------------------------------------------------------------------------------------------------------------------------------------------------------------------------------------------------------------------------------------------------------------------------------------------------------------------------------------------------------------------------------------------------------------------------------------------------------------------------------------------------------------------------------------------------------------------------------------------------------------------------------------------------------------------------------------------------------------------------------------------------------------------------------------------------------------------------------------------------------------------------------------------------------------------------------------------------------------------------------------------------------------------------------------------------------------------------------------------------------------------------------------------------------------------------------------------------------------------------------------------------------------------------------------------------------------------------------------------------------------------------------------------------------------------------------------------------------------------------------------------------------------------------------------------------------------------------------------------------------------------------------------------------------------------------------------------------------------------------------------------------------------------------------------------------------------------------------------------------------------------------------------------------------------------------------------------------------------------------------------------------------------------------------------------------------------------------------------------------------------------------------------------------------------------------------------------------------------------------------------------------------------------------------------------------------------------------------------------------------------------------------------------------------------------------------------------------------------------------------------------------------------------------------------------------------------------------------------------------------------------------------------------------------------------------------------------------------------------------------------------------------------------------------------------------------------------------------------------------------------------------------------------------------------------------------------------------------------------------------------------------------------------------------------------------------------------------------------------------------------------------------------------------------------------------------------------------------------------------------------------------------------------------------------------------------------------------------------------------------------------------------------------------------------------------------------------------------------------------------------------------------------------------------------------------------------------------------------------------------------------------------------------------------------------------------------------------------------------------------------------------------------------------------------------------------------------------------------------------------------------------------------------------------------------------------------------------------------------------------------------------------------------------------------------------------------------------------------------------------------------------------------------------------------------------------------------------------------------------------------------------------------------------------------------------------------------------------------------------------------------------------------------------------------------------------------------------------------------------------------------------------------------------------------------------------------------------------------------------------------------------------------------------------------------------------------------------------------------------------------------------------------------------------------------------------------------------------------------------------------------------------------------------------------------------------------------------------------------------------------------------------------------------------------------------------------------------------------------------------------------------------------------------------------------------------------------------------------------------------------------------------------------------------------------------------------------------------------------------------------------------------------------------------------------------------------------------------------------------------------------------------------------------------------------------------------------------------------------------------------------------------------------------------------------------------------------------------------------------------------------------------------------------------------------------------------------------------------------------------------------------------------------------------------------------------------------------------------------------------------------------------------------------------------------------------------------------------------------------------------------------------------------------------------------------------------------------------------------------------------------------------------------------------------------------------------------------------------------------------------------------------------------------------------------------------------------------------------------------------------------------------------------------------------------------------------------------------------------------------------------------------------------------------------------------------------------------------------------------------------------------------------------------------------------------------------------------------------------------------------------------------------------------------------------------------------------------------------------------------------------------------------------------------------------------------------------------------------------------------------------------------------------------------------------------------------------------------------------------------------------------------------------------------------------------------------------------------------------------------------------------------------------------------------------------------------------------------------------------------------------------------------------------------------------------------------------------------------------------------------------------------------------------------------------------------------------------------------------------------------------------------------------------------------------------------------------------------------------------------------------------------------------------------------------------------------------------------------------------------------------------------------------------------------------------------------------------------------------------------------------------------------------------------------------------------------------------------------------------------------------------------------------------------------------------------------------------------------------------------------------------------------------------------------------------------------------------------------------------------------------------------------------------------------------------------------------------------------------------------------------------------------------------------------------------------------------------------------------------------------------------------------------------------------------------------------------------------------------------------------------------------------------------------------------------------------------------------------------------------------------------------------------------------------------------------------------------------------------------------------------------------------------------------------------------------------------------------------------------------------------------------------------------------------------------------------------------------------------|----------------------------------------------------------------------------------------------------------------------------------------------------------------------------------------------|------------------------------------------------------------------------------------------------------------------------------------------------------------------------|-------------------------------------------------------------------------------------------------------------------------------------------------------------------------------------------------------------------------------------------------------------------------------------------------------------------------------------------------------------------------------------------------------------------------------------------------------------------------------------------------------------------|
| EPI_ISL_459963,<br>EPI_ISL_459964,<br>EPI_ISL_2214925                                                                                                                                                                                                                                                                                                                                                                                                                                                                                                                                                                                                                                                                                                                                                                                                                                                                                                                                                                                                                                                                                                                                                                                                                                                                                                                                                                                                                                                                                                                                                                                                                                                                                                                                                                                                                                                                                                                                                                                                                                                                                                                                                                                                                                                                                                                                                                                                                                                                                                                                                                                                                                                                                                                                                                                                                                                                                                                                                                                                                                                                                                                                                                                                                                                                                                                                                                                                                                                                                                                                                                                                                                                                                                                                                                                                                                                                                                                                                                                                                                                                                                                                                                                                                                                                                                                                                                                                                                                                                                                                                                                                                                                                                                                                                                                                                                                                                                                                                                                                                                                                                                                                                                                                                                                                                                                                                                                                                                                                                                                                                                                                                                                                                                                                                                                                                                                                                                                                                                                                                                                                                                                                                                                                                                                                                                                                                                                                                                                                                                                                                                                                                                                                                                                                                                                                                                                                                                                                                                                                                                                                                                                                                                                                                                                                                                                                                                                                                                                                                                                                                                                                                                                                                                                                                                                                                                                                                                                                                                                                                                                                                                                                                                                                                                                                                                                                                                                                                                                                                                                                                                                                                                                                                                                                                                                                                                                                                                                                                                                                                                                                                                                                                                                                                                                                                                                                                                                                                                                                                                                                                                                                                                                                                                                                                                                                                                                                                                                                                                                                                                                                                                                                                                                                                                                                                                                                                                                                                                                                                                                                                                                                                                                                                                                                                                                                                                                                                                                                                                                                                                                                                                                                                                                                                                                                                                                                                                                                                                                                                                                                                                                                                                                                                                                                                                                                                                                                                                                                                                                                                                                                                                                                                                                                                                                                                                                                                                                                                                                                                                                                                                                                                                                                                                                                                                                                                                                                                                                                                                                                                                                                                                                                                                                                                                                                                                                                                                                                                                                                                                                                                                                                                                                                                                                                                                                                                                                                                      | Centre Hospitalier Universitaire Clermont-Ferrand                                                                                                                                            | CHU Clermont-Ferrand, service de virologie                                                                                                                             | Bisseux Maxime; Combes Patricia; Henquell Cécile; Mirand Audrey                                                                                                                                                                                                                                                                                                                                                                                                                                                   |
| EPI_ISL_2354656                                                                                                                                                                                                                                                                                                                                                                                                                                                                                                                                                                                                                                                                                                                                                                                                                                                                                                                                                                                                                                                                                                                                                                                                                                                                                                                                                                                                                                                                                                                                                                                                                                                                                                                                                                                                                                                                                                                                                                                                                                                                                                                                                                                                                                                                                                                                                                                                                                                                                                                                                                                                                                                                                                                                                                                                                                                                                                                                                                                                                                                                                                                                                                                                                                                                                                                                                                                                                                                                                                                                                                                                                                                                                                                                                                                                                                                                                                                                                                                                                                                                                                                                                                                                                                                                                                                                                                                                                                                                                                                                                                                                                                                                                                                                                                                                                                                                                                                                                                                                                                                                                                                                                                                                                                                                                                                                                                                                                                                                                                                                                                                                                                                                                                                                                                                                                                                                                                                                                                                                                                                                                                                                                                                                                                                                                                                                                                                                                                                                                                                                                                                                                                                                                                                                                                                                                                                                                                                                                                                                                                                                                                                                                                                                                                                                                                                                                                                                                                                                                                                                                                                                                                                                                                                                                                                                                                                                                                                                                                                                                                                                                                                                                                                                                                                                                                                                                                                                                                                                                                                                                                                                                                                                                                                                                                                                                                                                                                                                                                                                                                                                                                                                                                                                                                                                                                                                                                                                                                                                                                                                                                                                                                                                                                                                                                                                                                                                                                                                                                                                                                                                                                                                                                                                                                                                                                                                                                                                                                                                                                                                                                                                                                                                                                                                                                                                                                                                                                                                                                                                                                                                                                                                                                                                                                                                                                                                                                                                                                                                                                                                                                                                                                                                                                                                                                                                                                                                                                                                                                                                                                                                                                                                                                                                                                                                                                                                                                                                                                                                                                                                                                                                                                                                                                                                                                                                                                                                                                                                                                                                                                                                                                                                                                                                                                                                                                                                                                                                                                                                                                                                                                                                                                                                                                                                                                                                                                                                                                                            | Centre for Clinical Infection and Diagnostics Research and Genomics Innovation Unit, Guy's and St. Thomas' NHS Trust                                                                         | COVID-19 Genomics UK (COG-UK) Consortium                                                                                                                               | Ali Raza Awan; Chloe Fisher; Jonathan Edgeworth; Luke Snell; Penny Cliff; Rahul Batra                                                                                                                                                                                                                                                                                                                                                                                                                             |
| EPI_ISL_841866,<br>EPI_ISL_1979903,<br>EPI_ISL_2127945,<br>EPI_ISL_2127950,<br>EPI_ISL_2128097,<br>EPI_ISL_2128124                                                                                                                                                                                                                                                                                                                                                                                                                                                                                                                                                                                                                                                                                                                                                                                                                                                                                                                                                                                                                                                                                                                                                                                                                                                                                                                                                                                                                                                                                                                                                                                                                                                                                                                                                                                                                                                                                                                                                                                                                                                                                                                                                                                                                                                                                                                                                                                                                                                                                                                                                                                                                                                                                                                                                                                                                                                                                                                                                                                                                                                                                                                                                                                                                                                                                                                                                                                                                                                                                                                                                                                                                                                                                                                                                                                                                                                                                                                                                                                                                                                                                                                                                                                                                                                                                                                                                                                                                                                                                                                                                                                                                                                                                                                                                                                                                                                                                                                                                                                                                                                                                                                                                                                                                                                                                                                                                                                                                                                                                                                                                                                                                                                                                                                                                                                                                                                                                                                                                                                                                                                                                                                                                                                                                                                                                                                                                                                                                                                                                                                                                                                                                                                                                                                                                                                                                                                                                                                                                                                                                                                                                                                                                                                                                                                                                                                                                                                                                                                                                                                                                                                                                                                                                                                                                                                                                                                                                                                                                                                                                                                                                                                                                                                                                                                                                                                                                                                                                                                                                                                                                                                                                                                                                                                                                                                                                                                                                                                                                                                                                                                                                                                                                                                                                                                                                                                                                                                                                                                                                                                                                                                                                                                                                                                                                                                                                                                                                                                                                                                                                                                                                                                                                                                                                                                                                                                                                                                                                                                                                                                                                                                                                                                                                                                                                                                                                                                                                                                                                                                                                                                                                                                                                                                                                                                                                                                                                                                                                                                                                                                                                                                                                                                                                                                                                                                                                                                                                                                                                                                                                                                                                                                                                                                                                                                                                                                                                                                                                                                                                                                                                                                                                                                                                                                                                                                                                                                                                                                                                                                                                                                                                                                                                                                                                                                                                                                                                                                                                                                                                                                                                                                                                                                                                                                                                                                                                         | Centre for Enzyme Innovation, University of Portsmouth / Translational Research Laboratory, Portsmouth Hospitals NHS Trust                                                                   | COVID-19 Genomics UK (COG-UK) Consortium                                                                                                                               | Allyson Lloyd; Angela Beckett; Anoop Chauhan; Christopher Fearn; Ethan Butcher; Garry Scarlett; Kate Cook; Katie Loveson; Kelly Bicknell; Robert Impy; Salman Goudarzi; Samuel Robson; Sarah Wylie; Scott Elliott; Sharon Glyasler; Yann Bourgeois                                                                                                                                                                                                                                                                |
| EPI_ISL_2149035,<br>EPI_ISL_2149054,<br>EPI_ISL_1849228                                                                                                                                                                                                                                                                                                                                                                                                                                                                                                                                                                                                                                                                                                                                                                                                                                                                                                                                                                                                                                                                                                                                                                                                                                                                                                                                                                                                                                                                                                                                                                                                                                                                                                                                                                                                                                                                                                                                                                                                                                                                                                                                                                                                                                                                                                                                                                                                                                                                                                                                                                                                                                                                                                                                                                                                                                                                                                                                                                                                                                                                                                                                                                                                                                                                                                                                                                                                                                                                                                                                                                                                                                                                                                                                                                                                                                                                                                                                                                                                                                                                                                                                                                                                                                                                                                                                                                                                                                                                                                                                                                                                                                                                                                                                                                                                                                                                                                                                                                                                                                                                                                                                                                                                                                                                                                                                                                                                                                                                                                                                                                                                                                                                                                                                                                                                                                                                                                                                                                                                                                                                                                                                                                                                                                                                                                                                                                                                                                                                                                                                                                                                                                                                                                                                                                                                                                                                                                                                                                                                                                                                                                                                                                                                                                                                                                                                                                                                                                                                                                                                                                                                                                                                                                                                                                                                                                                                                                                                                                                                                                                                                                                                                                                                                                                                                                                                                                                                                                                                                                                                                                                                                                                                                                                                                                                                                                                                                                                                                                                                                                                                                                                                                                                                                                                                                                                                                                                                                                                                                                                                                                                                                                                                                                                                                                                                                                                                                                                                                                                                                                                                                                                                                                                                                                                                                                                                                                                                                                                                                                                                                                                                                                                                                                                                                                                                                                                                                                                                                                                                                                                                                                                                                                                                                                                                                                                                                                                                                                                                                                                                                                                                                                                                                                                                                                                                                                                                                                                                                                                                                                                                                                                                                                                                                                                                                                                                                                                                                                                                                                                                                                                                                                                                                                                                                                                                                                                                                                                                                                                                                                                                                                                                                                                                                                                                                                                                                                                                                                                                                                                                                                                                                                                                                                                                                                                                                                                                                    | Centro Nacional de Gripe (Valladolid)                                                                                                                                                        | SeqCOVID-SPAIN consortium/IBV(CSIC)                                                                                                                                    | Diana Perez San José and SeqCOVID-SPAIN consortium; Iván Sanz Muñoz                                                                                                                                                                                                                                                                                                                                                                                                                                               |
| EPI_ISL_2367217<br>EPI_ISL_2035563,<br>EPI_ISL_2035734                                                                                                                                                                                                                                                                                                                                                                                                                                                                                                                                                                                                                                                                                                                                                                                                                                                                                                                                                                                                                                                                                                                                                                                                                                                                                                                                                                                                                                                                                                                                                                                                                                                                                                                                                                                                                                                                                                                                                                                                                                                                                                                                                                                                                                                                                                                                                                                                                                                                                                                                                                                                                                                                                                                                                                                                                                                                                                                                                                                                                                                                                                                                                                                                                                                                                                                                                                                                                                                                                                                                                                                                                                                                                                                                                                                                                                                                                                                                                                                                                                                                                                                                                                                                                                                                                                                                                                                                                                                                                                                                                                                                                                                                                                                                                                                                                                                                                                                                                                                                                                                                                                                                                                                                                                                                                                                                                                                                                                                                                                                                                                                                                                                                                                                                                                                                                                                                                                                                                                                                                                                                                                                                                                                                                                                                                                                                                                                                                                                                                                                                                                                                                                                                                                                                                                                                                                                                                                                                                                                                                                                                                                                                                                                                                                                                                                                                                                                                                                                                                                                                                                                                                                                                                                                                                                                                                                                                                                                                                                                                                                                                                                                                                                                                                                                                                                                                                                                                                                                                                                                                                                                                                                                                                                                                                                                                                                                                                                                                                                                                                                                                                                                                                                                                                                                                                                                                                                                                                                                                                                                                                                                                                                                                                                                                                                                                                                                                                                                                                                                                                                                                                                                                                                                                                                                                                                                                                                                                                                                                                                                                                                                                                                                                                                                                                                                                                                                                                                                                                                                                                                                                                                                                                                                                                                                                                                                                                                                                                                                                                                                                                                                                                                                                                                                                                                                                                                                                                                                                                                                                                                                                                                                                                                                                                                                                                                                                                                                                                                                                                                                                                                                                                                                                                                                                                                                                                                                                                                                                                                                                                                                                                                                                                                                                                                                                                                                                                                                                                                                                                                                                                                                                                                                                                                                                                                                                                                                                                     | Clemenshospital - Alexianer Clemenshospital Münster<br>Clinical Virology<br>Clinical Virology                                                                                                | Robert Koch Institute<br>Clinical Bacteriology<br>Clinical Virology                                                                                                    | Adrian Egli; Alfredo Mari; Fanny Wegner; Hans Hirsch; Helena MB Seth-Smith; Julia Bielicki; Karoline Leuzinger; Manuel Battagay; Tim Roloff<br>Anissa Chouikha; Henda Triki; Kais Ghedria; Marlem Gdoura; Sondos Haddad; Wasfi Fares; Wasfi Fraes                                                                                                                                                                                                                                                                 |
| EPI_ISL_700492                                                                                                                                                                                                                                                                                                                                                                                                                                                                                                                                                                                                                                                                                                                                                                                                                                                                                                                                                                                                                                                                                                                                                                                                                                                                                                                                                                                                                                                                                                                                                                                                                                                                                                                                                                                                                                                                                                                                                                                                                                                                                                                                                                                                                                                                                                                                                                                                                                                                                                                                                                                                                                                                                                                                                                                                                                                                                                                                                                                                                                                                                                                                                                                                                                                                                                                                                                                                                                                                                                                                                                                                                                                                                                                                                                                                                                                                                                                                                                                                                                                                                                                                                                                                                                                                                                                                                                                                                                                                                                                                                                                                                                                                                                                                                                                                                                                                                                                                                                                                                                                                                                                                                                                                                                                                                                                                                                                                                                                                                                                                                                                                                                                                                                                                                                                                                                                                                                                                                                                                                                                                                                                                                                                                                                                                                                                                                                                                                                                                                                                                                                                                                                                                                                                                                                                                                                                                                                                                                                                                                                                                                                                                                                                                                                                                                                                                                                                                                                                                                                                                                                                                                                                                                                                                                                                                                                                                                                                                                                                                                                                                                                                                                                                                                                                                                                                                                                                                                                                                                                                                                                                                                                                                                                                                                                                                                                                                                                                                                                                                                                                                                                                                                                                                                                                                                                                                                                                                                                                                                                                                                                                                                                                                                                                                                                                                                                                                                                                                                                                                                                                                                                                                                                                                                                                                                                                                                                                                                                                                                                                                                                                                                                                                                                                                                                                                                                                                                                                                                                                                                                                                                                                                                                                                                                                                                                                                                                                                                                                                                                                                                                                                                                                                                                                                                                                                                                                                                                                                                                                                                                                                                                                                                                                                                                                                                                                                                                                                                                                                                                                                                                                                                                                                                                                                                                                                                                                                                                                                                                                                                                                                                                                                                                                                                                                                                                                                                                                                                                                                                                                                                                                                                                                                                                                                                                                                                                                                                                                             | Conville CDC wc CVC                                                                                                                                                                          | NHLS/JUCT                                                                                                                                                              | Arash Iranzadeh; Bruna Galvao; Carolyn Williamson; Deelan Dooley; Diana Hardie; Houriyah Tegally; Innocent Mudau; Kruger Marais; Lynn Tyers; Marvin Hsiao; Stephen Korsman                                                                                                                                                                                                                                                                                                                                        |
| EPI_ISL_2308091                                                                                                                                                                                                                                                                                                                                                                                                                                                                                                                                                                                                                                                                                                                                                                                                                                                                                                                                                                                                                                                                                                                                                                                                                                                                                                                                                                                                                                                                                                                                                                                                                                                                                                                                                                                                                                                                                                                                                                                                                                                                                                                                                                                                                                                                                                                                                                                                                                                                                                                                                                                                                                                                                                                                                                                                                                                                                                                                                                                                                                                                                                                                                                                                                                                                                                                                                                                                                                                                                                                                                                                                                                                                                                                                                                                                                                                                                                                                                                                                                                                                                                                                                                                                                                                                                                                                                                                                                                                                                                                                                                                                                                                                                                                                                                                                                                                                                                                                                                                                                                                                                                                                                                                                                                                                                                                                                                                                                                                                                                                                                                                                                                                                                                                                                                                                                                                                                                                                                                                                                                                                                                                                                                                                                                                                                                                                                                                                                                                                                                                                                                                                                                                                                                                                                                                                                                                                                                                                                                                                                                                                                                                                                                                                                                                                                                                                                                                                                                                                                                                                                                                                                                                                                                                                                                                                                                                                                                                                                                                                                                                                                                                                                                                                                                                                                                                                                                                                                                                                                                                                                                                                                                                                                                                                                                                                                                                                                                                                                                                                                                                                                                                                                                                                                                                                                                                                                                                                                                                                                                                                                                                                                                                                                                                                                                                                                                                                                                                                                                                                                                                                                                                                                                                                                                                                                                                                                                                                                                                                                                                                                                                                                                                                                                                                                                                                                                                                                                                                                                                                                                                                                                                                                                                                                                                                                                                                                                                                                                                                                                                                                                                                                                                                                                                                                                                                                                                                                                                                                                                                                                                                                                                                                                                                                                                                                                                                                                                                                                                                                                                                                                                                                                                                                                                                                                                                                                                                                                                                                                                                                                                                                                                                                                                                                                                                                                                                                                                                                                                                                                                                                                                                                                                                                                                                                                                                                                                                                                                            | Croatian Institute of Public Health                                                                                                                                                          | Croatian Institute of Public Health                                                                                                                                    | Irena Tabain; Ivana Ferenčak                                                                                                                                                                                                                                                                                                                                                                                                                                                                                      |
| EPI_ISL_949235, EPI_ISL_1938886, EPI_ISL_1939012, EPI_ISL_1939014, EPI_ISL_1939015, EPI_ISL_1939022, EPI_ISL_1939031, EPI_ISL_2147325, EPI_ISL_2271116, EPI_ISL_2271118, EPI_ISL_2271121, EPI_ISL_2271122, EPI_ISL_2271123                                                                                                                                                                                                                                                                                                                                                                                                                                                                                                                                                                                                                                                                                                                                                                                                                                                                                                                                                                                                                                                                                                                                                                                                                                                                                                                                                                                                                                                                                                                                                                                                                                                                                                                                                                                                                                                                                                                                                                                                                                                                                                                                                                                                                                                                                                                                                                                                                                                                                                                                                                                                                                                                                                                                                                                                                                                                                                                                                                                                                                                                                                                                                                                                                                                                                                                                                                                                                                                                                                                                                                                                                                                                                                                                                                                                                                                                                                                                                                                                                                                                                                                                                                                                                                                                                                                                                                                                                                                                                                                                                                                                                                                                                                                                                                                                                                                                                                                                                                                                                                                                                                                                                                                                                                                                                                                                                                                                                                                                                                                                                                                                                                                                                                                                                                                                                                                                                                                                                                                                                                                                                                                                                                                                                                                                                                                                                                                                                                                                                                                                                                                                                                                                                                                                                                                                                                                                                                                                                                                                                                                                                                                                                                                                                                                                                                                                                                                                                                                                                                                                                                                                                                                                                                                                                                                                                                                                                                                                                                                                                                                                                                                                                                                                                                                                                                                                                                                                                                                                                                                                                                                                                                                                                                                                                                                                                                                                                                                                                                                                                                                                                                                                                                                                                                                                                                                                                                                                                                                                                                                                                                                                                                                                                                                                                                                                                                                                                                                                                                                                                                                                                                                                                                                                                                                                                                                                                                                                                                                                                                                                                                                                                                                                                                                                                                                                                                                                                                                                                                                                                                                                                                                                                                                                                                                                                                                                                                                                                                                                                                                                                                                                                                                                                                                                                                                                                                                                                                                                                                                                                                                                                                                                                                                                                                                                                                                                                                                                                                                                                                                                                                                                                                                                                                                                                                                                                                                                                                                                                                                                                                                                                                                                                                                                                                                                                                                                                                                                                                                                                                                                                                                                                                                                                                                 | Departamento de Microbiología, CDB, Hospital Clínic, Barcelona                                                                                                                               | SeqCOVID-SPAIN consortium/IBV(CSIC)                                                                                                                                    | Aida Peiró and SeqCOVID-SPAIN consortium; Andrea Vergara; Alicia Rubio; Jéssica Navero; Mikel Martínez                                                                                                                                                                                                                                                                                                                                                                                                            |
| see above                                                                                                                                                                                                                                                                                                                                                                                                                                                                                                                                                                                                                                                                                                                                                                                                                                                                                                                                                                                                                                                                                                                                                                                                                                                                                                                                                                                                                                                                                                                                                                                                                                                                                                                                                                                                                                                                                                                                                                                                                                                                                                                                                                                                                                                                                                                                                                                                                                                                                                                                                                                                                                                                                                                                                                                                                                                                                                                                                                                                                                                                                                                                                                                                                                                                                                                                                                                                                                                                                                                                                                                                                                                                                                                                                                                                                                                                                                                                                                                                                                                                                                                                                                                                                                                                                                                                                                                                                                                                                                                                                                                                                                                                                                                                                                                                                                                                                                                                                                                                                                                                                                                                                                                                                                                                                                                                                                                                                                                                                                                                                                                                                                                                                                                                                                                                                                                                                                                                                                                                                                                                                                                                                                                                                                                                                                                                                                                                                                                                                                                                                                                                                                                                                                                                                                                                                                                                                                                                                                                                                                                                                                                                                                                                                                                                                                                                                                                                                                                                                                                                                                                                                                                                                                                                                                                                                                                                                                                                                                                                                                                                                                                                                                                                                                                                                                                                                                                                                                                                                                                                                                                                                                                                                                                                                                                                                                                                                                                                                                                                                                                                                                                                                                                                                                                                                                                                                                                                                                                                                                                                                                                                                                                                                                                                                                                                                                                                                                                                                                                                                                                                                                                                                                                                                                                                                                                                                                                                                                                                                                                                                                                                                                                                                                                                                                                                                                                                                                                                                                                                                                                                                                                                                                                                                                                                                                                                                                                                                                                                                                                                                                                                                                                                                                                                                                                                                                                                                                                                                                                                                                                                                                                                                                                                                                                                                                                                                                                                                                                                                                                                                                                                                                                                                                                                                                                                                                                                                                                                                                                                                                                                                                                                                                                                                                                                                                                                                                                                                                                                                                                                                                                                                                                                                                                                                                                                                                                                                                                                  | Department of Bacteria, Parasites and Fungi, Statens Serum Institut, Copenhagen, Denmark                                                                                                     | Statens Serum Institut Bioinformatics and Microbial Genomics                                                                                                           | Danish Covid-19 Genome Consortium                                                                                                                                                                                                                                                                                                                                                                                                                                                                                 |
| EPI_ISL_2432242                                                                                                                                                                                                                                                                                                                                                                                                                                                                                                                                                                                                                                                                                                                                                                                                                                                                                                                                                                                                                                                                                                                                                                                                                                                                                                                                                                                                                                                                                                                                                                                                                                                                                                                                                                                                                                                                                                                                                                                                                                                                                                                                                                                                                                                                                                                                                                                                                                                                                                                                                                                                                                                                                                                                                                                                                                                                                                                                                                                                                                                                                                                                                                                                                                                                                                                                                                                                                                                                                                                                                                                                                                                                                                                                                                                                                                                                                                                                                                                                                                                                                                                                                                                                                                                                                                                                                                                                                                                                                                                                                                                                                                                                                                                                                                                                                                                                                                                                                                                                                                                                                                                                                                                                                                                                                                                                                                                                                                                                                                                                                                                                                                                                                                                                                                                                                                                                                                                                                                                                                                                                                                                                                                                                                                                                                                                                                                                                                                                                                                                                                                                                                                                                                                                                                                                                                                                                                                                                                                                                                                                                                                                                                                                                                                                                                                                                                                                                                                                                                                                                                                                                                                                                                                                                                                                                                                                                                                                                                                                                                                                                                                                                                                                                                                                                                                                                                                                                                                                                                                                                                                                                                                                                                                                                                                                                                                                                                                                                                                                                                                                                                                                                                                                                                                                                                                                                                                                                                                                                                                                                                                                                                                                                                                                                                                                                                                                                                                                                                                                                                                                                                                                                                                                                                                                                                                                                                                                                                                                                                                                                                                                                                                                                                                                                                                                                                                                                                                                                                                                                                                                                                                                                                                                                                                                                                                                                                                                                                                                                                                                                                                                                                                                                                                                                                                                                                                                                                                                                                                                                                                                                                                                                                                                                                                                                                                                                                                                                                                                                                                                                                                                                                                                                                                                                                                                                                                                                                                                                                                                                                                                                                                                                                                                                                                                                                                                                                                                                                                                                                                                                                                                                                                                                                                                                                                                                                                                                                                                            | Department of Clinical Microbiology                                                                                                                                                          | GIGA Medical Genomics                                                                                                                                                  | Bouchra Boujemla; Cécile Meex; Keith Durkin; Maria Artesi; Marie-Pierre Hayette; Pierrette Melin; Raphaël Boreux; Sébastien Bontems; Vincent Bours                                                                                                                                                                                                                                                                                                                                                                |
| EPI_ISL_872070                                                                                                                                                                                                                                                                                                                                                                                                                                                                                                                                                                                                                                                                                                                                                                                                                                                                                                                                                                                                                                                                                                                                                                                                                                                                                                                                                                                                                                                                                                                                                                                                                                                                                                                                                                                                                                                                                                                                                                                                                                                                                                                                                                                                                                                                                                                                                                                                                                                                                                                                                                                                                                                                                                                                                                                                                                                                                                                                                                                                                                                                                                                                                                                                                                                                                                                                                                                                                                                                                                                                                                                                                                                                                                                                                                                                                                                                                                                                                                                                                                                                                                                                                                                                                                                                                                                                                                                                                                                                                                                                                                                                                                                                                                                                                                                                                                                                                                                                                                                                                                                                                                                                                                                                                                                                                                                                                                                                                                                                                                                                                                                                                                                                                                                                                                                                                                                                                                                                                                                                                                                                                                                                                                                                                                                                                                                                                                                                                                                                                                                                                                                                                                                                                                                                                                                                                                                                                                                                                                                                                                                                                                                                                                                                                                                                                                                                                                                                                                                                                                                                                                                                                                                                                                                                                                                                                                                                                                                                                                                                                                                                                                                                                                                                                                                                                                                                                                                                                                                                                                                                                                                                                                                                                                                                                                                                                                                                                                                                                                                                                                                                                                                                                                                                                                                                                                                                                                                                                                                                                                                                                                                                                                                                                                                                                                                                                                                                                                                                                                                                                                                                                                                                                                                                                                                                                                                                                                                                                                                                                                                                                                                                                                                                                                                                                                                                                                                                                                                                                                                                                                                                                                                                                                                                                                                                                                                                                                                                                                                                                                                                                                                                                                                                                                                                                                                                                                                                                                                                                                                                                                                                                                                                                                                                                                                                                                                                                                                                                                                                                                                                                                                                                                                                                                                                                                                                                                                                                                                                                                                                                                                                                                                                                                                                                                                                                                                                                                                                                                                                                                                                                                                                                                                                                                                                                                                                                                                                                                                             | Department of Clinical Microbiology                                                                                                                                                          | Aalborg University<br>Aalborg University                                                                                                                               | Danish Covid-19 Genome Consortium<br>Danish Covid-19 Genome Consortium                                                                                                                                                                                                                                                                                                                                                                                                                                            |
| EPI_ISL_1866507, EPI_ISL_1873531, EPI_ISL_1873533, EPI_ISL_1875912, EPI_ISL_1876795, EPI_ISL_1881460, EPI_ISL_1887349, EPI_ISL_1891473, EPI_ISL_1892464                                                                                                                                                                                                                                                                                                                                                                                                                                                                                                                                                                                                                                                                                                                                                                                                                                                                                                                                                                                                                                                                                                                                                                                                                                                                                                                                                                                                                                                                                                                                                                                                                                                                                                                                                                                                                                                                                                                                                                                                                                                                                                                                                                                                                                                                                                                                                                                                                                                                                                                                                                                                                                                                                                                                                                                                                                                                                                                                                                                                                                                                                                                                                                                                                                                                                                                                                                                                                                                                                                                                                                                                                                                                                                                                                                                                                                                                                                                                                                                                                                                                                                                                                                                                                                                                                                                                                                                                                                                                                                                                                                                                                                                                                                                                                                                                                                                                                                                                                                                                                                                                                                                                                                                                                                                                                                                                                                                                                                                                                                                                                                                                                                                                                                                                                                                                                                                                                                                                                                                                                                                                                                                                                                                                                                                                                                                                                                                                                                                                                                                                                                                                                                                                                                                                                                                                                                                                                                                                                                                                                                                                                                                                                                                                                                                                                                                                                                                                                                                                                                                                                                                                                                                                                                                                                                                                                                                                                                                                                                                                                                                                                                                                                                                                                                                                                                                                                                                                                                                                                                                                                                                                                                                                                                                                                                                                                                                                                                                                                                                                                                                                                                                                                                                                                                                                                                                                                                                                                                                                                                                                                                                                                                                                                                                                                                                                                                                                                                                                                                                                                                                                                                                                                                                                                                                                                                                                                                                                                                                                                                                                                                                                                                                                                                                                                                                                                                                                                                                                                                                                                                                                                                                                                                                                                                                                                                                                                                                                                                                                                                                                                                                                                                                                                                                                                                                                                                                                                                                                                                                                                                                                                                                                                                                                                                                                                                                                                                                                                                                                                                                                                                                                                                                                                                                                                                                                                                                                                                                                                                                                                                                                                                                                                                                                                                                                                                                                                                                                                                                                                                                                                                                                                                                                                                                                                                                    | Department of Clinical Microbiology and Center for Genomic Medicine, Rigshospitalet, Copenhagen, Denmark<br>Department of Clinical Microbiology, Odense University Hospital, Odense, Denmark | Bergthaler laboratory, CeMM Research Center for Molecular Medicine of the Austrian Academy of Sciences<br>Norwegian Institute of Public Health, Department of Virology | Andreas Bergthaler; Anna Schedi; Bekir Erguner; Benedikt Agerer; Christoph Bock; Fabian Amman; Jan Laine; Lukas Endler; Maelle Le Moing; Martin Senekowitsch; Michael Schuster; Petr Triska; Thomas Penz<br>Kathrine Stene-Johansen; Atiya R Ali; Debech Nadia; Engebretsen Serina Beate; Garcia Llorente Ignacio; Hilde Elshaug; Hilde Volla; Jon Bråte; Kamilla Heddeland Insteferd; Karoline Bragstad; Line Victoria Moen; Marie Paulsen Madsen; Olav Hungnes; Pedersen Benedikte Neveen; Rasmus Riis Kopperud |
| EPI_ISL_23139494                                                                                                                                                                                                                                                                                                                                                                                                                                                                                                                                                                                                                                                                                                                                                                                                                                                                                                                                                                                                                                                                                                                                                                                                                                                                                                                                                                                                                                                                                                                                                                                                                                                                                                                                                                                                                                                                                                                                                                                                                                                                                                                                                                                                                                                                                                                                                                                                                                                                                                                                                                                                                                                                                                                                                                                                                                                                                                                                                                                                                                                                                                                                                                                                                                                                                                                                                                                                                                                                                                                                                                                                                                                                                                                                                                                                                                                                                                                                                                                                                                                                                                                                                                                                                                                                                                                                                                                                                                                                                                                                                                                                                                                                                                                                                                                                                                                                                                                                                                                                                                                                                                                                                                                                                                                                                                                                                                                                                                                                                                                                                                                                                                                                                                                                                                                                                                                                                                                                                                                                                                                                                                                                                                                                                                                                                                                                                                                                                                                                                                                                                                                                                                                                                                                                                                                                                                                                                                                                                                                                                                                                                                                                                                                                                                                                                                                                                                                                                                                                                                                                                                                                                                                                                                                                                                                                                                                                                                                                                                                                                                                                                                                                                                                                                                                                                                                                                                                                                                                                                                                                                                                                                                                                                                                                                                                                                                                                                                                                                                                                                                                                                                                                                                                                                                                                                                                                                                                                                                                                                                                                                                                                                                                                                                                                                                                                                                                                                                                                                                                                                                                                                                                                                                                                                                                                                                                                                                                                                                                                                                                                                                                                                                                                                                                                                                                                                                                                                                                                                                                                                                                                                                                                                                                                                                                                                                                                                                                                                                                                                                                                                                                                                                                                                                                                                                                                                                                                                                                                                                                                                                                                                                                                                                                                                                                                                                                                                                                                                                                                                                                                                                                                                                                                                                                                                                                                                                                                                                                                                                                                                                                                                                                                                                                                                                                                                                                                                                                                                                                                                                                                                                                                                                                                                                                                                                                                                                                                                                                           | Department of Molecular Virology, Cyprus Institute of Neurology and Genetics                                                                                                                 | Department of Molecular Virology, Cyprus Institute of Neurology and Genetics                                                                                           | Anastasis Oulas; Andreas Hadjisavvas; Christina Christodoulou; Christina Tryfonos; Dana Koptides; Denise Alexandrou; George Krashias; George Spyrou; Jan Richter; Maria Loizidou; Mihalis Panayiotidis; Olga Kalakouta; Pavlos Fanis; Stavros Bashiardes                                                                                                                                                                                                                                                          |
| EPI_ISL_1164660,<br>EPI_ISL_1164665,<br>EPI_ISL_1164685,<br>EPI_ISL_1164694<br>EPI_ISL_679158,<br>EPI_ISL_813159                                                                                                                                                                                                                                                                                                                                                                                                                                                                                                                                                                                                                                                                                                                                                                                                                                                                                                                                                                                                                                                                                                                                                                                                                                                                                                                                                                                                                                                                                                                                                                                                                                                                                                                                                                                                                                                                                                                                                                                                                                                                                                                                                                                                                                                                                                                                                                                                                                                                                                                                                                                                                                                                                                                                                                                                                                                                                                                                                                                                                                                                                                                                                                                                                                                                                                                                                                                                                                                                                                                                                                                                                                                                                                                                                                                                                                                                                                                                                                                                                                                                                                                                                                                                                                                                                                                                                                                                                                                                                                                                                                                                                                                                                                                                                                                                                                                                                                                                                                                                                                                                                                                                                                                                                                                                                                                                                                                                                                                                                                                                                                                                                                                                                                                                                                                                                                                                                                                                                                                                                                                                                                                                                                                                                                                                                                                                                                                                                                                                                                                                                                                                                                                                                                                                                                                                                                                                                                                                                                                                                                                                                                                                                                                                                                                                                                                                                                                                                                                                                                                                                                                                                                                                                                                                                                                                                                                                                                                                                                                                                                                                                                                                                                                                                                                                                                                                                                                                                                                                                                                                                                                                                                                                                                                                                                                                                                                                                                                                                                                                                                                                                                                                                                                                                                                                                                                                                                                                                                                                                                                                                                                                                                                                                                                                                                                                                                                                                                                                                                                                                                                                                                                                                                                                                                                                                                                                                                                                                                                                                                                                                                                                                                                                                                                                                                                                                                                                                                                                                                                                                                                                                                                                                                                                                                                                                                                                                                                                                                                                                                                                                                                                                                                                                                                                                                                                                                                                                                                                                                                                                                                                                                                                                                                                                                                                                                                                                                                                                                                                                                                                                                                                                                                                                                                                                                                                                                                                                                                                                                                                                                                                                                                                                                                                                                                                                                                                                                                                                                                                                                                                                                                                                                                                                                                                                                                                                           | Department of Pathology, University of Cambridge                                                                                                                                             | COVID-19 Genomics UK (COG-UK) Consortium                                                                                                                               | Aminu S. Jahun; Grant Hall; Ian Goodfellow; Iliana Georgana; Malte Pincknet; Martin D. Curran; Myra Hosmillo; Surendra Parmar; Yasmin Chaudhry                                                                                                                                                                                                                                                                                                                                                                    |
| EPI_ISL_2137099,<br>EPI_ISL_2137111                                                                                                                                                                                                                                                                                                                                                                                                                                                                                                                                                                                                                                                                                                                                                                                                                                                                                                                                                                                                                                                                                                                                                                                                                                                                                                                                                                                                                                                                                                                                                                                                                                                                                                                                                                                                                                                                                                                                                                                                                                                                                                                                                                                                                                                                                                                                                                                                                                                                                                                                                                                                                                                                                                                                                                                                                                                                                                                                                                                                                                                                                                                                                                                                                                                                                                                                                                                                                                                                                                                                                                                                                                                                                                                                                                                                                                                                                                                                                                                                                                                                                                                                                                                                                                                                                                                                                                                                                                                                                                                                                                                                                                                                                                                                                                                                                                                                                                                                                                                                                                                                                                                                                                                                                                                                                                                                                                                                                                                                                                                                                                                                                                                                                                                                                                                                                                                                                                                                                                                                                                                                                                                                                                                                                                                                                                                                                                                                                                                                                                                                                                                                                                                                                                                                                                                                                                                                                                                                                                                                                                                                                                                                                                                                                                                                                                                                                                                                                                                                                                                                                                                                                                                                                                                                                                                                                                                                                                                                                                                                                                                                                                                                                                                                                                                                                                                                                                                                                                                                                                                                                                                                                                                                                                                                                                                                                                                                                                                                                                                                                                                                                                                                                                                                                                                                                                                                                                                                                                                                                                                                                                                                                                                                                                                                                                                                                                                                                                                                                                                                                                                                                                                                                                                                                                                                                                                                                                                                                                                                                                                                                                                                                                                                                                                                                                                                                                                                                                                                                                                                                                                                                                                                                                                                                                                                                                                                                                                                                                                                                                                                                                                                                                                                                                                                                                                                                                                                                                                                                                                                                                                                                                                                                                                                                                                                                                                                                                                                                                                                                                                                                                                                                                                                                                                                                                                                                                                                                                                                                                                                                                                                                                                                                                                                                                                                                                                                                                                                                                                                                                                                                                                                                                                                                                                                                                                                                                                                                                        | Department of Virology and Immunology, University of Helsinki and Helsinki University Hospital, HUSLAB Finland                                                                               | Department of Virology, Faculty of Medicine, University of Helsinki, Helsinki, Finland                                                                                 | Essi Korhonen; Hanna Jarva; Hanna Liimatainen; Hannimari Kallio-Kokko; Harri Kangas; Hussein Alburkat; Jenni Virtanen; Maija Lappalainen; Maija Suvaranta; Olli Vapalahti; Pekka Ellonen; Phuoc Truong; Ravi Kant; Sari Hannula; Satu Kurkela; Teemu Smura                                                                                                                                                                                                                                                        |
| EPI_ISL_23139494                                                                                                                                                                                                                                                                                                                                                                                                                                                                                                                                                                                                                                                                                                                                                                                                                                                                                                                                                                                                                                                                                                                                                                                                                                                                                                                                                                                                                                                                                                                                                                                                                                                                                                                                                                                                                                                                                                                                                                                                                                                                                                                                                                                                                                                                                                                                                                                                                                                                                                                                                                                                                                                                                                                                                                                                                                                                                                                                                                                                                                                                                                                                                                                                                                                                                                                                                                                                                                                                                                                                                                                                                                                                                                                                                                                                                                                                                                                                                                                                                                                                                                                                                                                                                                                                                                                                                                                                                                                                                                                                                                                                                                                                                                                                                                                                                                                                                                                                                                                                                                                                                                                                                                                                                                                                                                                                                                                                                                                                                                                                                                                                                                                                                                                                                                                                                                                                                                                                                                                                                                                                                                                                                                                                                                                                                                                                                                                                                                                                                                                                                                                                                                                                                                                                                                                                                                                                                                                                                                                                                                                                                                                                                                                                                                                                                                                                                                                                                                                                                                                                                                                                                                                                                                                                                                                                                                                                                                                                                                                                                                                                                                                                                                                                                                                                                                                                                                                                                                                                                                                                                                                                                                                                                                                                                                                                                                                                                                                                                                                                                                                                                                                                                                                                                                                                                                                                                                                                                                                                                                                                                                                                                                                                                                                                                                                                                                                                                                                                                                                                                                                                                                                                                                                                                                                                                                                                                                                                                                                                                                                                                                                                                                                                                                                                                                                                                                                                                                                                                                                                                                                                                                                                                                                                                                                                                                                                                                                                                                                                                                                                                                                                                                                                                                                                                                                                                                                                                                                                                                                                                                                                                                                                                                                                                                                                                                                                                                                                                                                                                                                                                                                                                                                                                                                                                                                                                                                                                                                                                                                                                                                                                                                                                                                                                                                                                                                                                                                                                                                                                                                                                                                                                                                                                                                                                                                                                                                                                                                           | Department of Virology, Pitié-Salpêtrière hospital                                                                                                                                           | Department of Virology, Pitié-Salpêtrière hospital                                                                                                                     | Anne-Geneviève Marcelin; Aude Jary; Karen Zafilzka; Stéphanie Marot; Valentin Leducq; Vincent Calvez                                                                                                                                                                                                                                                                                                                                                                                                              |
| EPI_ISL_855616, EPI_ISL_855623, EPI_ISL_855718, EPI_ISL_855737, EPI_ISL_855744, EPI_ISL_855748, EPI_ISL_855756, EPI_ISL_855779, EPI_ISL_855785, EPI_ISL_855787, EPI_ISL_855792, EPI_ISL_855799, EPI_ISL_855806, EPI_ISL_855837, EPI_ISL_855869, EPI_ISL_855871, EPI_ISL_855873, EPI_ISL_855915, EPI_ISL_855924, EPI_ISL_855982, EPI_ISL_855991, EPI_ISL_855996, EPI_ISL_856007, EPI_ISL_856015, EPI_ISL_856019, EPI_ISL_856040, EPI_ISL_856189, EPI_ISL_856222, EPI_ISL_856374, EPI_ISL_856420, EPI_ISL_856443, EPI_ISL_856535, EPI_ISL_856563, EPI_ISL_856602, EPI_ISL_856631, EPI_ISL_856642, EPI_ISL_856671, EPI_ISL_856675, EPI_ISL_869425, EPI_ISL_869485, EPI_ISL_869585, EPI_ISL_869606, EPI_ISL_869622, EPI_ISL_869715, EPI_ISL_869724, EPI_ISL_869741, EPI_ISL_869744, EPI_ISL_869866, EPI_ISL_869898, EPI_ISL_870071, EPI_ISL_870171, EPI_ISL_870250, EPI_ISL_870282, EPI_ISL_870285, EPI_ISL_870420, EPI_ISL_870441, EPI_ISL_870489, EPI_ISL_870555, EPI_ISL_870572, EPI_ISL_870632, EPI_ISL_870646, EPI_ISL_870681, EPI_ISL_870715, EPI_ISL_870738, EPI_ISL_870796, EPI_ISL_870806, EPI_ISL_870867, EPI_ISL_870876, EPI_ISL_870898, EPI_ISL_870912, EPI_ISL_870919, EPI_ISL_870961, EPI_ISL_870969, EPI_ISL_871025, EPI_ISL_871048, EPI_ISL_871083, EPI_ISL_871214, EPI_ISL_871228, EPI_ISL_870981, EPI_ISL_871241, EPI_ISL_871242, EPI_ISL_871253, EPI_ISL_871257, EPI_ISL_871259, EPI_ISL_871371, EPI_ISL_871401, EPI_ISL_871414, EPI_ISL_871423, EPI_ISL_871431, EPI_ISL_871433, EPI_ISL_871435, EPI_ISL_871437, EPI_ISL_871439, EPI_ISL_871441, EPI_ISL_871443, EPI_ISL_871445, EPI_ISL_871447, EPI_ISL_871449, EPI_ISL_871451, EPI_ISL_871453, EPI_ISL_871455, EPI_ISL_871457, EPI_ISL_871459, EPI_ISL_871461, EPI_ISL_871463, EPI_ISL_871465, EPI_ISL_871467, EPI_ISL_871469, EPI_ISL_871471, EPI_ISL_871473, EPI_ISL_871475, EPI_ISL_871477, EPI_ISL_871479, EPI_ISL_871481, EPI_ISL_871483, EPI_ISL_871485, EPI_ISL_871487, EPI_ISL_871489, EPI_ISL_871491, EPI_ISL_871493, EPI_ISL_871495, EPI_ISL_871497, EPI_ISL_871499, EPI_ISL_871501, EPI_ISL_871503, EPI_ISL_871505, EPI_ISL_871507, EPI_ISL_871509, EPI_ISL_871511, EPI_ISL_871513, EPI_ISL_871515, EPI_ISL_871517, EPI_ISL_871519, EPI_ISL_871521, EPI_ISL_871523, EPI_ISL_871525, EPI_ISL_871527, EPI_ISL_871529, EPI_ISL_871531, EPI_ISL_871533, EPI_ISL_871535, EPI_ISL_871537, EPI_ISL_871539, EPI_ISL_871541, EPI_ISL_871543, EPI_ISL_871545, EPI_ISL_871547, EPI_ISL_871549, EPI_ISL_871551, EPI_ISL_871553, EPI_ISL_871555, EPI_ISL_871557, EPI_ISL_871559, EPI_ISL_871561, EPI_ISL_871563, EPI_ISL_871565, EPI_ISL_871567, EPI_ISL_871569, EPI_ISL_871571, EPI_ISL_871573, EPI_ISL_871575, EPI_ISL_871577, EPI_ISL_871579, EPI_ISL_871581, EPI_ISL_871583, EPI_ISL_871585, EPI_ISL_871587, EPI_ISL_871589, EPI_ISL_871591, EPI_ISL_871593, EPI_ISL_871595, EPI_ISL_871597, EPI_ISL_871599, EPI_ISL_871601, EPI_ISL_871603, EPI_ISL_871605, EPI_ISL_871607, EPI_ISL_871609, EPI_ISL_871611, EPI_ISL_871613, EPI_ISL_871615, EPI_ISL_871617, EPI_ISL_871619, EPI_ISL_871621, EPI_ISL_871623, EPI_ISL_871625, EPI_ISL_871627, EPI_ISL_871629, EPI_ISL_871631, EPI_ISL_871633, EPI_ISL_871635, EPI_ISL_871637, EPI_ISL_871639, EPI_ISL_871641, EPI_ISL_871643, EPI_ISL_871645, EPI_ISL_871647, EPI_ISL_871649, EPI_ISL_871651, EPI_ISL_871653, EPI_ISL_871655, EPI_ISL_871657, EPI_ISL_871659, EPI_ISL_871661, EPI_ISL_871663, EPI_ISL_871665, EPI_ISL_871667, EPI_ISL_871669, EPI_ISL_871671, EPI_ISL_871673, EPI_ISL_871675, EPI_ISL_871677, EPI_ISL_871679, EPI_ISL_871681, EPI_ISL_871683, EPI_ISL_871685, EPI_ISL_871687, EPI_ISL_871689, EPI_ISL_871691, EPI_ISL_871693, EPI_ISL_871695, EPI_ISL_871697, EPI_ISL_871699, EPI_ISL_871701, EPI_ISL_871703, EPI_ISL_871705, EPI_ISL_871707, EPI_ISL_871709, EPI_ISL_871711, EPI_ISL_871713, EPI_ISL_871715, EPI_ISL_871717, EPI_ISL_871719, EPI_ISL_871721, EPI_ISL_871723, EPI_ISL_871725, EPI_ISL_871727, EPI_ISL_871729, EPI_ISL_871731, EPI_ISL_871733, EPI_ISL_871735, EPI_ISL_871737, EPI_ISL_871739, EPI_ISL_871741, EPI_ISL_871743, EPI_ISL_871745, EPI_ISL_871747, EPI_ISL_871749, EPI_ISL_871751, EPI_ISL_871753, EPI_ISL_871755, EPI_ISL_871757, EPI_ISL_871759, EPI_ISL_871761, EPI_ISL_871763, EPI_ISL_871765, EPI_ISL_871767, EPI_ISL_871769, EPI_ISL_871771, EPI_ISL_871773, EPI_ISL_871775, EPI_ISL_871777, EPI_ISL_871779, EPI_ISL_871781, EPI_ISL_871783, EPI_ISL_871785, EPI_ISL_871787, EPI_ISL_871789, EPI_ISL_871791, EPI_ISL_871793, EPI_ISL_871795, EPI_ISL_871797, EPI_ISL_871799, EPI_ISL_871801, EPI_ISL_871803, EPI_ISL_871805, EPI_ISL_871807, EPI_ISL_871809, EPI_ISL_871811, EPI_ISL_871813, EPI_ISL_871815, EPI_ISL_871817, EPI_ISL_871819, EPI_ISL_871821, EPI_ISL_871823, EPI_ISL_871825, EPI_ISL_871827, EPI_ISL_871829, EPI_ISL_871831, EPI_ISL_871833, EPI_ISL_871835, EPI_ISL_871837, EPI_ISL_871839, EPI_ISL_871841, EPI_ISL_871843, EPI_ISL_871845, EPI_ISL_871847, EPI_ISL_871849, EPI_ISL_871851, EPI_ISL_871853, EPI_ISL_871855, EPI_ISL_871857, EPI_ISL_871859, EPI_ISL_871861, EPI_ISL_871863, EPI_ISL_871865, EPI_ISL_871867, EPI_ISL_871869, EPI_ISL_871871, EPI_ISL_871873, EPI_ISL_871875, EPI_ISL_871877, EPI_ISL_871879, EPI_ISL_871881, EPI_ISL_871883, EPI_ISL_871885, EPI_ISL_871887, EPI_ISL_871889, EPI_ISL_871891, EPI_ISL_871893, EPI_ISL_871895, EPI_ISL_871897, EPI_ISL_871899, EPI_ISL_871901, EPI_ISL_871903, EPI_ISL_871905, EPI_ISL_871907, EPI_ISL_871909, EPI_ISL_871911, EPI_ISL_871913, EPI_ISL_871915, EPI_ISL_871917, EPI_ISL_871919, EPI_ISL_871921, EPI_ISL_871923, EPI_ISL_871925, EPI_ISL_871927, EPI_ISL_871929, EPI_ISL_871931, EPI_ISL_871933, EPI_ISL_871935, EPI_ISL_871937, EPI_ISL_871939, EPI_ISL_871941, EPI_ISL_871943, EPI_ISL_871945, EPI_ISL_871947, EPI_ISL_871949, EPI_ISL_871951, EPI_ISL_871953, EPI_ISL_871955, EPI_ISL_871957, EPI_ISL_871959, EPI_ISL_871961, EPI_ISL_871963, EPI_ISL_871965, EPI_ISL_871967, EPI_ISL_871969, EPI_ISL_871971, EPI_ISL_871973, EPI_ISL_871975, EPI_ISL_871977, EPI_ISL_871979, EPI_ISL_871981, EPI_ISL_871983, EPI_ISL_871985, EPI_ISL_871987, EPI_ISL_871989, EPI_ISL_871991, EPI_ISL_871993, EPI_ISL_871995, EPI_ISL_871997, EPI_ISL_871999, EPI_ISL_872001, EPI_ISL_872003, EPI_ISL_872005, EPI_ISL_872007, EPI_ISL_872009, EPI_ISL_872011, EPI_ISL_872013, EPI_ISL_872015, EPI_ISL_872017, EPI_ISL_872019, EPI_ISL_872021, EPI_ISL_872023, EPI_ISL_872025, EPI_ISL_872027, EPI_ISL_872029, EPI_ISL_872031, EPI_ISL_872033, EPI_ISL_872035, EPI_ISL_872037, EPI_ISL_872039, EPI_ISL_872041, EPI_ISL_872043, EPI_ISL_872045, EPI_ISL_872047, EPI_ISL_872049, EPI_ISL_872051, EPI_ISL_872053, EPI_ISL_872055, EPI_ISL_872057, EPI_ISL_872059, EPI_ISL_872061, EPI_ISL_872063, EPI_ISL_872065, EPI_ISL_872067, EPI_ISL_872069, EPI_ISL_872071, EPI_ISL_872073, EPI_ISL_872075, EPI_ISL_872077, EPI_ISL_872079, EPI_ISL_872081, EPI_ISL_872083, EPI_ISL_872085, EPI_ISL_872087, EPI_ISL_872089, EPI_ISL_872091, EPI_ISL_872093, EPI_ISL_872095, EPI_ISL_872097, EPI_ISL_872099, EPI_ISL_872101, EPI_ISL_872103, EPI_ISL_872105, EPI_ISL_872107, EPI_ISL_872109, EPI_ISL_872111, EPI_ISL_872113, EPI_ISL_872115, EPI_ISL_872117, EPI_ISL_872119, EPI_ISL_872121, EPI_ISL_872123, EPI_ISL_872125, EPI_ISL_872127, EPI_ISL_872129, EPI_ISL_872131, EPI_ISL_872133, EPI_ISL_872135, EPI_ISL_872137, EPI_ISL_872139, EPI_ISL_872141, EPI_ISL_872143, EPI_ISL_872145, EPI_ISL_872147, EPI_ISL_872149, EPI_ISL_872151, EPI_ISL_872153, EPI_ISL_872155, EPI_ISL_872157, EPI_ISL_872159, EPI_ISL_872161, EPI_ISL_872163, EPI_ISL_872165, EPI_ISL_872167, EPI_ISL_872169, EPI_ISL_872171, EPI_ISL_872173, EPI_ISL_872175, EPI_ISL_872177, EPI_ISL_872179, EPI_ISL_872181, EPI_ISL_872183, EPI_ISL_872185, EPI_ISL_872187, EPI_ISL_872189, EPI_ISL_872191, EPI_ISL_872193, EPI_ISL_872195, EPI_ISL_872197, EPI_ISL_872199, EPI_ISL_872201, EPI_ISL_872203, EPI_ISL_872205, EPI_ISL_872207, EPI_ISL_872209, EPI_ISL_872211, EPI_ISL_872213, EPI_ISL_872215, EPI_ISL_872217, EPI_ISL_872219, EPI_ISL_872221, EPI_ISL_872223, EPI_ISL_872225, EPI_ISL_872227, EPI_ISL_872229, EPI_ISL_872231, EPI_ISL_872233, EPI_ISL_872235, EPI_ISL_872237, EPI_ISL_872239, EPI_ISL_872241, EPI_ISL_872243, EPI_ISL_872245, EPI_ISL_872247, EPI_ISL_872249, EPI_ISL_872251, EPI_ISL_872253, EPI_ISL_872255, EPI_ISL_872257, EPI_ISL_872259, EPI_ISL_872261, EPI_ISL_872263, EPI_ISL_872265, EPI_ISL_872267, EPI_ISL_872269, EPI_ISL_872271, EPI_ISL_872273, EPI_ISL_872275, EPI_ISL_872277, EPI_ISL_872279, EPI_ISL_872281, EPI_ISL_872283, EPI_ISL_872285, EPI_ISL_872287, EPI_ISL_872289, EPI_ISL_872291, EPI_ISL_872293, EPI_ISL_872295, EPI_ISL_872297, EPI_ISL_872299, EPI_ISL_872301, EPI_ISL_872303, EPI_ISL_872305, EPI_ISL_872307, EPI_ISL_872309, EPI_ISL_872311, EPI_ISL_872313, EPI_ISL_872315, EPI_ISL_872317, EPI_ISL_872319, EPI_ISL_872321, EPI_ISL_872323, EPI_ISL_872325, EPI_ISL_872327, EPI_ISL_872329, EPI_ISL_872331, EPI_ISL_872333, EPI_ISL_872335, EPI_ISL_872337, EPI_ISL_872339, EPI_ISL_872341, EPI_ISL_872343, EPI_ISL_872345, EPI_ISL_872347, EPI_ISL_872349, EPI_ISL_872351, EPI_ISL_872353, EPI_ISL_872355, EPI_ISL_872357, EPI_ISL_872359, EPI_ISL_872361, EPI_ISL_872363, EPI_ISL_872365, EPI_ISL_872367, EPI_ISL_872369, EPI_ISL_872371, EPI_ISL_872373, EPI_ISL_872375, EPI_ISL_872377, EPI_ISL_872379, EPI_ISL_872381, EPI_ISL_872383, EPI_ISL_872385, EPI_ISL_872387, EPI_ISL_872389, EPI_ISL_872391, EPI_ISL_872393, EPI_ISL_872395, EPI_ISL_872397, EPI_ISL_872399, EPI_ISL_872401, EPI_ISL_872403, EPI_ISL_872405, EPI_ISL_872407, EPI_ISL_872409, EPI_ISL_872411, EPI_ISL_872413, EPI_ISL_872415, EPI_ISL_872417, EPI_ISL_872419, EPI_ISL_872421, EPI_ISL_872423, EPI_ISL_872425, EPI_ISL_872427, EPI_ISL_872429, EPI_ISL_872431, EPI_ISL_872433, EPI_ISL_872435, EPI_ISL_872437, EPI_ISL_872439, EPI_ISL_872441, EPI_ISL_872443, EPI_ISL_872445, EPI_ISL_872447, EPI_ISL_872449, EPI_ISL_872451, EPI_ISL_872453, EPI_ISL_872455, EPI_ISL_872457, EPI_ISL_872459, EPI_ISL_872461, EPI_ISL_872463, EPI_ISL_872465, EPI_ISL_872467, EPI_ISL_872469, EPI_ISL_872471, EPI_ISL_872473, EPI_ISL_872475, EPI_ISL_872477, EPI_ISL_872479, EPI_ISL_872481, EPI_ISL_872483, EPI_ISL_872485, EPI_ISL_872487, EPI_ISL_872489, EPI_ISL_872491, EPI_ISL_872493, EPI_ISL_872495, EPI_ISL_872497, EPI_ISL_872499, EPI_ISL_872501, EPI_ISL_872503, EPI_ISL_872505, EPI_ISL_872507, EPI_ISL_872509, EPI_ISL_872511, EPI_ISL_872513, EPI_ISL_872515, EPI_ISL_872517, EPI_ISL_872519, EPI_ISL_872521, EPI_ISL_872523, EPI_ISL_872525, EPI_ISL_872527, EPI_ISL_872529, EPI_ISL_872531, EPI_ISL_872533, EPI_ISL_872535, EPI_ISL_872537, EPI_ISL_872539, EPI_ISL_872541, EPI_ISL_872543, EPI_ISL_872545, EPI_ISL_872547, EPI_ISL_872549, EPI_ISL_872551, EPI_ISL_872553, EPI_ISL_872555, EPI_ISL_872557, EPI_ISL_872559, EPI_ISL_872561, EPI_ISL_872563, EPI_ISL_872565, EPI_ISL_872567, EPI_ISL_872569, EPI_ISL_872571, EPI_ISL_872573, EPI_ISL_872575, EPI_ISL_872577, EPI_ISL_872579, EPI_ISL_872581, EPI_ISL_872583, EPI_ISL_872585, EPI_ISL_872587, EPI_ISL_872589, EPI_ISL_872591, EPI_ISL_872593, EPI_ISL_872595, EPI_ISL_872597, EPI_ISL_872599, EPI_ISL_872601, EPI_ISL_872603, EPI_ISL_872605, EPI_ISL_872607, EPI_ISL_872609, EPI_ISL_872611, EPI_ISL_872613, EPI_ISL_872615, EPI_ISL_872617, EPI_ISL_872619, EPI_ISL_872621, EPI_ISL_872623, EPI_ISL_872625, EPI_ISL_872627, EPI_ISL_872629, EPI_ISL_872631, EPI_ISL_872633, EPI_ISL_872635, EPI_ISL_872637, EPI_ISL_872639, EPI_ISL_872641, EPI_ISL_872643, EPI_ISL_872645, EPI_ISL_872647, EPI_ISL_872649, EPI_ISL_872651, EPI_ISL_872653, EPI_ISL_872655, EPI_ISL_872657, EPI_ISL_872659, EPI_ISL_872661, EPI_ISL_872663, EPI_ISL_872665, EPI_ISL_872667, EPI_ISL_872669, EPI_ISL_872671, EPI_ISL_872673, EPI_ISL_872675, EPI_ISL_872677, EPI_ISL_872679, EPI_ISL_872681, EPI_ISL_872683, EPI_ISL_872685, EPI_ISL_872687, EPI_ISL_872689, EPI_ISL_872691, EPI_ISL_872693, EPI_ISL_872695, EPI_ISL_872697, EPI_ISL_872699, EPI_ISL_872701, EPI_ISL_872703, EPI_ISL_872705, EPI_ISL_872707, EPI_ISL_872709, EPI_ISL_872711, EPI_ISL_872713, EPI_ISL_872715, EPI_ISL_872717, EPI_ISL_872719, EPI_ISL_872721, EPI_ISL_872723, EPI_ISL_872725, EPI_ISL_872727, EPI_ISL_872729, EPI_ISL_872731, EPI_ISL_872733, EPI_ISL_872735, EPI_ISL_872737, EPI_ISL_872739, EPI_ISL_872741, EPI_ISL_872743, EPI_ISL_872745, EPI_ISL_872747, EPI_ISL_872749, EPI_ISL_872751, EPI_ISL_872753, EPI_ISL_872755, EPI_ISL_872757, EPI_ISL_872759, EPI_ISL_872761, EPI_ISL_872763, EPI_ISL_872765, EPI_ISL_872767, EPI_ISL_872769, EPI_ISL_872771, EPI_ISL_872773, EPI_ISL_872775, EPI_ISL_872777, EPI_ISL_872779, EPI_ISL_872781, EPI_ISL_872783, EPI_ISL_872785, EPI_ISL_872787, EPI_ISL_872789, EPI_ISL_872791, EPI_ISL_872793, EPI_ISL_872795, EPI_ISL_872797, EPI_ISL_872799, EPI_ISL_872801, EPI_ISL_872803, EPI_ISL_872805, EPI_ISL_872807, EPI_ISL_872809, EPI_ISL_872811, EPI_ISL_872813, EPI_ISL_872815, EPI_ISL_872817, EPI_ISL_872819, EPI_ISL_872821, EPI_ISL_872823, EPI_ISL_872825, EPI_ISL_872827, EPI_ISL_872829, EPI_ISL_872831, EPI_ISL_872833, EPI_ISL_872835, EPI_ISL_872837, EPI_ISL_872839, EPI_ISL_872841, EPI_ISL_872843, EPI_ISL_872845, EPI_ISL_872847, EPI_ISL_872849, EPI_ISL_872851, EPI_ISL_872853, EPI_ISL_872855, EPI_ISL_872857, EPI_ISL_872859, EPI_ISL_872861, EPI_ISL_872863, EPI_ISL_872865, EPI_ISL_872867, EPI_ISL_872869, EPI_ISL_872871, EPI_ISL_872873, EPI_ISL_872875, EPI_ISL_872877, EPI_ISL_872879, EPI_ISL_872881, EPI_ISL_872883, EPI_ISL_872885, EPI_ISL_872887, EPI_ISL_872889, EPI_ISL_872891, EPI_ISL_872893, EPI_ISL_872895, EPI_ISL_872897, EPI_ISL_872899, EPI_ISL_872901, EPI_ISL_872903, EPI_ISL_872905, EPI_ISL_872907, EPI_ISL_872909, EPI_ISL_872911, EPI_ISL_872913, EPI_ISL_872915, EPI_ISL_872917, EPI_ISL_872919, EPI_ISL_872921, EPI_ISL_872923, EPI_ISL_872925, EPI_ISL_87 |                                                                                                                                                                                              |                                                                                                                                                                        |                                                                                                                                                                                                                                                                                                                                                                                                                                                                                                                   |

[illegible]

|                                                                                                                                                                                                                                                                                                 |                                                                                                                                                                     |                                                                                                                                            |                                                                                                                                                                                                                                                                                                                                                                                                                                                                                                                                                                                                 |
|-------------------------------------------------------------------------------------------------------------------------------------------------------------------------------------------------------------------------------------------------------------------------------------------------|---------------------------------------------------------------------------------------------------------------------------------------------------------------------|--------------------------------------------------------------------------------------------------------------------------------------------|-------------------------------------------------------------------------------------------------------------------------------------------------------------------------------------------------------------------------------------------------------------------------------------------------------------------------------------------------------------------------------------------------------------------------------------------------------------------------------------------------------------------------------------------------------------------------------------------------|
| EPI_ISL_883158, EPI_ISL_883159, EPI_ISL_883160, EPI_ISL_883161, EPI_ISL_883162, EPI_ISL_883163, EPI_ISL_883164, EPI_ISL_883165, EPI_ISL_883166, EPI_ISL_883167, EPI_ISL_883168, EPI_ISL_883169, EPI_ISL_883170, EPI_ISL_883171                                                                  |                                                                                                                                                                     |                                                                                                                                            |                                                                                                                                                                                                                                                                                                                                                                                                                                                                                                                                                                                                 |
| see above                                                                                                                                                                                                                                                                                       | Hannover Medical School, Institute of Virology                                                                                                                      | Hannover Medical School, Institute of Virology                                                                                             | Jasper Götting; Lars Steinbrück                                                                                                                                                                                                                                                                                                                                                                                                                                                                                                                                                                 |
| EPI_ISL_1088902                                                                                                                                                                                                                                                                                 | Helix / Illumina                                                                                                                                                    | Respiratory Viruses Branch, Division of Viral Diseases, Centers for Disease Control and Prevention                                         | Alexandre Bolze; Ary Ascencio; Ben L. Rambo-Martin; Brad Sickler; Charlotte Rivera-García; Christine Tran; Clinton R. Paden; Dakota Howard; David Becker; Dhwani Batra; Duncan MacCannell; Effen Sandoval; Eileen de Feo; Elizabeth Cirulli; Eric Allen; Geraint Levan; James Lu; Jan Antico; Jason Nguyen; Jimmy Ramirez; Jingtao Liu; Kelly Schiabor Barrett; Kim Gietzen; Magnus Isaksson; Marc Laurent; Matthew Tolentino; Nicole L. Washington; Peter W. Cook; Phil Febbo; Ryan Cho; Shannon Wickline; Sherry Wang; Simon White; Summer Galloway; Suxiang Tong; Tyler Cassens; William Lee |
| EPI_ISL_718237                                                                                                                                                                                                                                                                                  | Hospital                                                                                                                                                            | National Reference Center for Viruses of Respiratory Infections, Institut Pasteur, Paris                                                   | Angela Brisebarre; Camille Capel; Etienne Simon-Lorière; Gisèle Lagathu; Marion Barbet; Maud Vanpeene; Méline Bizard; Sylvie Behillili; Sylvie van der Werf; Vincent Enouf                                                                                                                                                                                                                                                                                                                                                                                                                      |
| EPI_ISL_862581                                                                                                                                                                                                                                                                                  | Hospital Clínic                                                                                                                                                     | Instituto de Salud Carlos III                                                                                                              | A. Monzón; F. Casas; I. Jiménez; I. Marcos; Iglesias-Caballero; M. Pozo; M. Cuesta; M. González-Esguevillas; M. Zaballos; M.A.; M.Camarero; P. Jiménez; S. Juliá; S. Molinero Calamita; S. Varona                                                                                                                                                                                                                                                                                                                                                                                               |
| EPI_ISL_1225137                                                                                                                                                                                                                                                                                 | Hospital Clínico Universitario Lozano Blesa de Zaragoza (España)                                                                                                    | SeqCOVID-SPAIN consortium/IBV(CSIC)                                                                                                        | Jessica Bueno and SeqCOVID-SPAIN consortium; Rafael Benito; Sonia Algarate                                                                                                                                                                                                                                                                                                                                                                                                                                                                                                                      |
| EPI_ISL_1423921                                                                                                                                                                                                                                                                                 | Hospital Clínico Universitario Virgen de la Arrixaca (Murcia)                                                                                                       | SeqCOVID-SPAIN consortium/IBV(CSIC)                                                                                                        | Antonio Moreno Docón; Genevova Yagüe and SeqCOVID-SPAIN consortium; Manuel Segovia Hernández                                                                                                                                                                                                                                                                                                                                                                                                                                                                                                    |
| EPI_ISL_2401191, EPI_ISL_2401192, EPI_ISL_2401204, EPI_ISL_2401211, EPI_ISL_2401212, EPI_ISL_2401224, EPI_ISL_2401227, EPI_ISL_2401231, EPI_ISL_2401232                                                                                                                                         | Hospital General Universitario Gregorio Marañón                                                                                                                     | Hospital General Universitario Gregorio Marañón                                                                                            | Cristina Rodriguez-Grande; Darío García de Viedma; Julia Suárez; Laura Pérez-Lago; Marta Herranz Martín; Patricia Muñoz; Pedro Sola Campoy; Pilar Catalán; Sergio Buenestado Serrano; Víctor Manuel de la Cueva                                                                                                                                                                                                                                                                                                                                                                                 |
| see above                                                                                                                                                                                                                                                                                       | Hospital General Universitario Gregorio Marañón                                                                                                                     | SeqCOVID-SPAIN consortium/IBV(CSIC)                                                                                                        | Darío García de Viedma; Jon Sicilia; Julia Suárez; Laura Pérez-Lago; Marta Herranz; Patricia Muñoz and SeqCOVID-SPAIN consortium; Pedro J Sola-Campoy; Pilar Catalán; Sergio Buenestado-Serrano; Víctor Manuel de la Cueva                                                                                                                                                                                                                                                                                                                                                                      |
| EPI_ISL_779996, EPI_ISL_814058, EPI_ISL_861843                                                                                                                                                                                                                                                  | Hospital General Universitario de Alicante - Instituto de Investigación Sanitaria y Biomédica de Alicante                                                           | SeqCOVID-SPAIN consortium/IBV(CSIC)                                                                                                        | Carmen Molina Pardines and SeqCOVID-SPAIN consortium; Maripaz Ventero Martín                                                                                                                                                                                                                                                                                                                                                                                                                                                                                                                    |
| EPI_ISL_1311888, EPI_ISL_2103493                                                                                                                                                                                                                                                                | Hospital General Universitario de Ciudad Real                                                                                                                       | SeqCOVID-SPAIN consortium/IBV(CSIC)                                                                                                        | Cristina Colmenarejo; Jorge Alfredo Pérez García and SeqCOVID-SPAIN consortium; José Martínez-Alarcón; Lidia García-Agudo; Marta Torres-Narbona; Soledad Illescas Fernández-Bermejo                                                                                                                                                                                                                                                                                                                                                                                                             |
| EPI_ISL_2147373, EPI_ISL_2147392                                                                                                                                                                                                                                                                | Hospital General Universitario de Elche - Fundación para el Fomento de la Investigación Sanitaria y Biomédica de la Comunitat Valenciana, Servicio de Microbiología | SeqCOVID-SPAIN consortium/IBV(CSIC)                                                                                                        | Antonio Galiana Cabrera; Judith Sánchez-Almendo; Montserrat Ruiz García; Nieves Gonzalo Jiménez and SeqCOVID-SPAIN consortium                                                                                                                                                                                                                                                                                                                                                                                                                                                                   |
| EPI_ISL_1916188                                                                                                                                                                                                                                                                                 | Hospital Universitari Arnau de Vilanova de Lleida                                                                                                                   | SeqCOVID-SPAIN consortium/IBV(CSIC)                                                                                                        | Alba Bellés Bellés; Albert Bernet Sánchez; Eric López González; Iván Prats Sánchez; Mercè García González and SeqCOVID-SPAIN consortium                                                                                                                                                                                                                                                                                                                                                                                                                                                         |
| EPI_ISL_1938921, EPI_ISL_1938922, EPI_ISL_1938938, EPI_ISL_1938941, EPI_ISL_1938947, EPI_ISL_1938948                                                                                                                                                                                            | Hospital Universitari de Bellvitge                                                                                                                                  | Microbiology Department                                                                                                                    | Aida Gonzalez-Diaz; Carmen Ardanuy; Jordi Camara; Jordi Niubó; Laura Calatayud; M Angeles Domínguez; Miguel Fernandez-Huerta; Sara Martí                                                                                                                                                                                                                                                                                                                                                                                                                                                        |
| EPI_ISL_1360265, EPI_ISL_1963989, EPI_ISL_1963993, EPI_ISL_2017682                                                                                                                                                                                                                              | Hospital Universitari Vall d'Hebron - Vall d'Hebron Institut de Recerca                                                                                             | Hospital Universitari Vall d'Hebron - Vall d'Hebron Institut de Recerca                                                                    | Alejandra González-Sánchez; Andrés Antón; Ariadna Rando; Carla Castillo; Cristina Andrés; Damiir García-Cehic; Josep F Abril; Josep Quer; Juliana Esperalba; Maria Carmen Martín; Maria Gema Codina; Maria Piñana; Tomás Pumarola                                                                                                                                                                                                                                                                                                                                                               |
| EPI_ISL_824413, EPI_ISL_825351, EPI_ISL_1080843, EPI_ISL_1391181, EPI_ISL_2284948, EPI_ISL_2391938, EPI_ISL_2458135, EPI_ISL_2458159, EPI_ISL_2493138                                                                                                                                           | Hospital Universitari de La Plana                                                                                                                                   | SeqCOVID-SPAIN consortium/IBV(CSIC)                                                                                                        | Alberto Yagüe Muñoz; Helena Buj Jordá; Juan B. Bellido Blasco; Maria Gil Fortuño and SeqCOVID-SPAIN consortium; Noelia Henández Pérez; Oscar Pérez Olaso                                                                                                                                                                                                                                                                                                                                                                                                                                        |
| see above                                                                                                                                                                                                                                                                                       | Hospital Universitari i Politècnic La Fe de València                                                                                                                | SeqCOVID-SPAIN consortium/IBV(CSIC)                                                                                                        | Ana Gil Brusola; Eva González Barberá; José Luis López Hontangas and SeqCOVID-SPAIN consortium; María Dolores Gómez Ruiz; Salvador Giner Almaraz                                                                                                                                                                                                                                                                                                                                                                                                                                                |
| EPI_ISL_2016366, EPI_ISL_2016367                                                                                                                                                                                                                                                                | Hospital Universitario Clínico San Cecilio                                                                                                                          | SeqCOVID-SPAIN consortium/IBV(CSIC)                                                                                                        | Adolfo de Salazar; Federico García; Laura Viñuela; Natalia Chueca and SeqCOVID-SPAIN consortium                                                                                                                                                                                                                                                                                                                                                                                                                                                                                                 |
| EPI_ISL_2100078, EPI_ISL_2100094, EPI_ISL_2100099, EPI_ISL_2100101, EPI_ISL_2100102                                                                                                                                                                                                             | Hospital Universitario Marqués de Valdecilla - IDIVAL (Santander, Cantabria)                                                                                        | SeqCOVID-SPAIN consortium/IBV(CSIC)                                                                                                        | Daniel Pablo Marcos; Jesús Rodríguez Rodríguez; Jose Manuel Méndez Legaza; María Eliecer Cano García; María Siller Ruiz and SeqCOVID-SPAIN consortium; Mónica Gozalo Margüello                                                                                                                                                                                                                                                                                                                                                                                                                  |
| EPI_ISL_2099969, EPI_ISL_2099991, EPI_ISL_2100032, EPI_ISL_2100037, EPI_ISL_2100059, EPI_ISL_2271234, EPI_ISL_2271237, EPI_ISL_2271385, EPI_ISL_2271387, EPI_ISL_2464635, EPI_ISL_2464639, EPI_ISL_2464643, EPI_ISL_2464644, EPI_ISL_2464645                                                    | Hospital Universitario Virgen de las Nieves de Granada-SAS                                                                                                          | SeqCOVID-SPAIN consortium/IBV(CSIC)                                                                                                        | Irene Pedrosa Corral; José M. Navarro-Mari and SeqCOVID-SPAIN consortium; Sara Sanhonmatsu Gámez                                                                                                                                                                                                                                                                                                                                                                                                                                                                                                |
| see above                                                                                                                                                                                                                                                                                       | Hospital Universitario de Guadalajara                                                                                                                               | SeqCOVID-SPAIN consortium/IBV(CSIC)                                                                                                        | Alejandro González Praetorius y Mariela Martínez Ramírez and SeqCOVID-SPAIN consortium                                                                                                                                                                                                                                                                                                                                                                                                                                                                                                          |
| EPI_ISL_1938849                                                                                                                                                                                                                                                                                 | Hospital Universitario de la Ribera (Alzira, Valencia)                                                                                                              | SeqCOVID-SPAIN consortium/IBV(CSIC)                                                                                                        | Julia González Cantó and SeqCOVID-SPAIN consortium; Olalla Martínez Macias                                                                                                                                                                                                                                                                                                                                                                                                                                                                                                                      |
| EPI_ISL_1938709, EPI_ISL_1938745, EPI_ISL_2271326, EPI_ISL_2271333                                                                                                                                                                                                                              | Hospital de la Santa Creu i Sant Pau. Servicio de Microbiología                                                                                                     | SeqCOVID-SPAIN consortium/IBV(CSIC)                                                                                                        | Eisenda Miró and SeqCOVID-SPAIN consortium; Ferran Navarro; Núria Rabella                                                                                                                                                                                                                                                                                                                                                                                                                                                                                                                       |
| EPI_ISL_1588976, EPI_ISL_1938747, EPI_ISL_1938748, EPI_ISL_1938749, EPI_ISL_1938765, EPI_ISL_1938778, EPI_ISL_1938780, EPI_ISL_1938787                                                                                                                                                          | Hospital of Southern Norway - Kristiansand, Department of Medical Microbiology                                                                                      | Norwegian Institute of Public Health, Department of Virology                                                                               | Kathrine Stene-Johansen; Atiya R Ali; Debec Nadia; Engebretsen Serina Beate; García Llorente Ignacio; Hilde Elshaug; Hilde Vollan; Jon Bråte; Kamilla Heddeland Instefjord; Karoline Bragstad; Line Victoria Moen; Marie Paulsen Madsen; Olav Hungnes; Pedersen Benedikte Nevjen; Rasmus Riis Kopperud                                                                                                                                                                                                                                                                                          |
| see above                                                                                                                                                                                                                                                                                       | Hôpital Henri Mondor                                                                                                                                                | Department of Virology, Henri Mondor University Hospital, Assistance Publique Hôpitaux de Paris, Université Paris-Est Créteil, INSERM U955 | Alexandre Soulier; Christophe Rodriguez; Elisabeth Trawinski; Guillaume Gricourt; Jean-Michel Pawlowsky; Melissa N'Debi; Slim Fourati; Vanessa Demontant                                                                                                                                                                                                                                                                                                                                                                                                                                        |
| EPI_ISL_2081680, EPI_ISL_2135347, EPI_ISL_2135350, EPI_ISL_2135354, EPI_ISL_2135355, EPI_ISL_2135356, EPI_ISL_2135358, EPI_ISL_2135361, EPI_ISL_2135365, EPI_ISL_2135368, EPI_ISL_2135369                                                                                                       | Hôpital Saint Antoine                                                                                                                                               | Department of Virology, Henri Mondor University Hospital, Assistance Publique Hôpitaux de Paris, Université Paris-Est Créteil, INSERM U955 | Alexandre Soulier; Christophe Rodriguez; Elisabeth Trawinski; Guillaume Gricourt; Jean-Michel Pawlowsky; Melissa N'Debi; Slim Fourati; Vanessa Demontant                                                                                                                                                                                                                                                                                                                                                                                                                                        |
| see above                                                                                                                                                                                                                                                                                       | ILV Kärnten                                                                                                                                                         | Berghaler laboratory, CeMM Research Center for Molecular Medicine of the Austrian Academy of Sciences                                      | Andreas Berghaler; Anna Schedl; Bekir Erguner; Benedikt Agerer; Christoph Bock; Fabian Amman; Jan Laine; Lukas Endler; Maelle Le Moing; Martin Senekowitsch; Michael Schuster; Petr Triska; Thomas Penz                                                                                                                                                                                                                                                                                                                                                                                         |
| EPI_ISL_1671557, EPI_ISL_2099811, EPI_ISL_2099814, EPI_ISL_2099815, EPI_ISL_2099816, EPI_ISL_2099822, EPI_ISL_2099823, EPI_ISL_2099824, EPI_ISL_2099827, EPI_ISL_2099828, EPI_ISL_2099829, EPI_ISL_2099831, EPI_ISL_2099833, EPI_ISL_2099837, EPI_ISL_2099838, EPI_ISL_2099841, EPI_ISL_2099845 | IMD - Labor Oderland                                                                                                                                                | Robert Koch Institute                                                                                                                      | A. Kruggel; Aleksandar Radonic; K. Meinck; Marianne Wedde; Oliver Drechsel; Ralf Duerrwald; Rene Kmiecinski; Stefan Kroeger; Stephan Fuchs; Thorsten Wolff                                                                                                                                                                                                                                                                                                                                                                                                                                      |
| see above                                                                                                                                                                                                                                                                                       | IMD - MVZ Labor Greifswald                                                                                                                                          | Robert Koch Institute, Influenza and respiratory viruses FG17 & Bioinformatics MF1, Berlin, Germany                                        |                                                                                                                                                                                                                                                                                                                                                                                                                                                                                                                                                                                                 |
| EPI_ISL_2333495, EPI_ISL_2333544                                                                                                                                                                                                                                                                | INMI Lazzaro Spallanzani IRCCS                                                                                                                                      | INMI Lazzaro Spallanzani IRCCS                                                                                                             | A Di Caro; B Bartolini; CEM Gruber; E Giombini; F Messina; M Rueca; MR Capobianchi; O Butera                                                                                                                                                                                                                                                                                                                                                                                                                                                                                                    |
| EPI_ISL_912731, EPI_ISL_912809, EPI_ISL_912952                                                                                                                                                                                                                                                  | IRCCS San Gallicano Dermatological Institute                                                                                                                        | IRCCS Regina Elena National Cancer Institute                                                                                               | Aldo Morrone; Fabrizio Ensoli; Francesca De Nicola; Fulvia Pimpinelli; Gennaro Ciliberto; Giovanni Blandino; Grazia Prignano; Matteo Pallocca; Maurizio Fanciulli; Sabrina Strano; Sara Donzelli                                                                                                                                                                                                                                                                                                                                                                                                |
| EPI_ISL_2464870, EPI_ISL_2465004                                                                                                                                                                                                                                                                | IZSM                                                                                                                                                                | TIGEM                                                                                                                                      | Andrea Ballabio; Anna Manfredi; Antonio Grimaldi; Antonio Limone Luigi Atripaldi Pellegrino Cerino; Biancamaria Pierri Claudia Tiberio Valentina Bouche; Chiara Colantuono; Davide Cacchiarelli; Denise Di Concilio; Francesco Panariello; Lucio Di Filippo; Marcello Salvi; Maria Concetta Cuomo; Patrizia Annunziata                                                                                                                                                                                                                                                                          |
| EPI_ISL_2485204, EPI_ISL_2485214, EPI_ISL_2485225                                                                                                                                                                                                                                               |                                                                                                                                                                     | SeqCOVID-SPAIN consortium/IBV(CSIC)                                                                                                        | Alberto Delgado-Iribarren; Esther Culebras López; Jorge Matias-Guiu; Luis Ortega Medina; Silvia Sánchez Ramón; Ulises Gómez-Pinedo and SeqCOVID-SPAIN consortium; Vicente Estrada Pérez                                                                                                                                                                                                                                                                                                                                                                                                         |
| EPI_ISL_1844606, EPI_ISL_1048316                                                                                                                                                                                                                                                                | Innlandet Hospital Trust, Division Lillehammer, Department for Medical Microbiology                                                                                 | Norwegian Institute of Public Health, Department of Virology                                                                               | Hilde Elshaug; Hilde Vollan; Kamilla Heddeland Instefjord; Karoline Bragstad; Kathrine Stene-Johansen; Marie Paulsen Madsen; Olav Hungnes; Rasmus Riis Kopperud                                                                                                                                                                                                                                                                                                                                                                                                                                 |
| EPI_ISL_1169886, EPI_ISL_1670904, EPI_ISL_1670906, EPI_ISL_1670907, EPI_ISL_1670909                                                                                                                                                                                                             |                                                                                                                                                                     |                                                                                                                                            |                                                                                                                                                                                                                                                                                                                                                                                                                                                                                                                                                                                                 |
| EPI_ISL_1390685                                                                                                                                                                                                                                                                                 |                                                                                                                                                                     |                                                                                                                                            |                                                                                                                                                                                                                                                                                                                                                                                                                                                                                                                                                                                                 |
| EPI_ISL_1938976, EPI_ISL_1938979, EPI_ISL_1938985, EPI_ISL_2464664, EPI_ISL_2464668, EPI_ISL_2465728, EPI_ISL_2465740                                                                                                                                                                           |                                                                                                                                                                     |                                                                                                                                            |                                                                                                                                                                                                                                                                                                                                                                                                                                                                                                                                                                                                 |
| see above                                                                                                                                                                                                                                                                                       | IdiSSC/Hospital Clínico San Carlos de Madrid                                                                                                                        |                                                                                                                                            |                                                                                                                                                                                                                                                                                                                                                                                                                                                                                                                                                                                                 |
| EPI_ISL_708039                                                                                                                                                                                                                                                                                  |                                                                                                                                                                     |                                                                                                                                            |                                                                                                                                                                                                                                                                                                                                                                                                                                                                                                                                                                                                 |

|                                                                                                                                                                                                                                                                                                                                                                                                                                                                                                                                                                                                                                                                                                                                                                                                                                                                                                                                                                              |                                                                                                                                             |                                                                                                                                             |                                                                                                                                                                                                                                                                                                                                                                                                                                                                                                                                                                                                                                        |
|------------------------------------------------------------------------------------------------------------------------------------------------------------------------------------------------------------------------------------------------------------------------------------------------------------------------------------------------------------------------------------------------------------------------------------------------------------------------------------------------------------------------------------------------------------------------------------------------------------------------------------------------------------------------------------------------------------------------------------------------------------------------------------------------------------------------------------------------------------------------------------------------------------------------------------------------------------------------------|---------------------------------------------------------------------------------------------------------------------------------------------|---------------------------------------------------------------------------------------------------------------------------------------------|----------------------------------------------------------------------------------------------------------------------------------------------------------------------------------------------------------------------------------------------------------------------------------------------------------------------------------------------------------------------------------------------------------------------------------------------------------------------------------------------------------------------------------------------------------------------------------------------------------------------------------------|
| EPI_ISL_2466045                                                                                                                                                                                                                                                                                                                                                                                                                                                                                                                                                                                                                                                                                                                                                                                                                                                                                                                                                              | Inst. for Med. Virology, University Hospital Frankfurt, Goethe University Frankfurt                                                         | Inst. for Med. Virology, University Hospital Frankfurt, Goethe University Frankfurt                                                         | Goetsch, U.; Gotschalk; H.F.; Pallas, C.; R. and Ciesek, S.; Rabenau; Toptan, T.; Widera, M.; Wilhelm, A.                                                                                                                                                                                                                                                                                                                                                                                                                                                                                                                              |
| EPI_ISL_1138634, EPI_ISL_1138665                                                                                                                                                                                                                                                                                                                                                                                                                                                                                                                                                                                                                                                                                                                                                                                                                                                                                                                                             | Institut für Medizinische Virologie, Universitätsklinikum Frankfurt                                                                         | Institut für Medizinische Virologie, Universitätsklinikum Frankfurt                                                                         | Barbara Muehlemann et al                                                                                                                                                                                                                                                                                                                                                                                                                                                                                                                                                                                                               |
| EPI_ISL_1008013                                                                                                                                                                                                                                                                                                                                                                                                                                                                                                                                                                                                                                                                                                                                                                                                                                                                                                                                                              | Institut für Pathologie, Salzkammergut Klinikum Vöcklabruck                                                                                 | Bergthaler laboratory, CeMM Research Center for Molecular Medicine of the Austrian Academy of Sciences                                      | Andreas Bergthaler; Anna Schedl; Bekir Erguner; Benedikt Agerer; Christoph Bock; Jan Laine; Lukas Endler; Maelle Le Moing; Martin Senekowitsch; Michael Schuster; Thomas Penz                                                                                                                                                                                                                                                                                                                                                                                                                                                          |
| EPI_ISL_437919, EPI_ISL_437931, EPI_ISL_437932, EPI_ISL_934547, EPI_ISL_1671133, EPI_ISL_1671134                                                                                                                                                                                                                                                                                                                                                                                                                                                                                                                                                                                                                                                                                                                                                                                                                                                                             | Institut für Virologie am Department für Hygiene, Mikrobiologie und Public Health                                                           | Bergthaler laboratory, CeMM Research Center for Molecular Medicine of the Austrian Academy of Sciences                                      | Alexander Lercher; Alexandra Popa; Andreas Bergthaler; Anna Schedl; Bekir Erguner; Benedikt Agerer; Christoph Bock; Dorothee von Laer; Elisabeth Puchhammer-Stoeckl; Fabian Amman; Guenter Weiss; Henrique Colaco; Jakob-Wendelin Genger; Jan Laine; Judith Aberle; Lukas Endler; Maelle Le Moing; Manfred Nairz; Mark Smyth; Martin Senekowitsch; Michael Schuster; Petr Triska; Stephan Aberle; Thomas Penz; Wegene Borena                                                                                                                                                                                                           |
| EPI_ISL_485810, EPI_ISL_485811, EPI_ISL_485813, EPI_ISL_508687, EPI_ISL_508688, EPI_ISL_508689, EPI_ISL_508690, EPI_ISL_508691, EPI_ISL_508694, EPI_ISL_508695, EPI_ISL_508696, EPI_ISL_508699, EPI_ISL_508701, EPI_ISL_508702                                                                                                                                                                                                                                                                                                                                                                                                                                                                                                                                                                                                                                                                                                                                               |                                                                                                                                             |                                                                                                                                             |                                                                                                                                                                                                                                                                                                                                                                                                                                                                                                                                                                                                                                        |
| see above                                                                                                                                                                                                                                                                                                                                                                                                                                                                                                                                                                                                                                                                                                                                                                                                                                                                                                                                                                    | Institut für Virologie und Epidemiologie der Viruserkrankheiten, Universitätsklinikum Tübingen                                              | NGS Competence Center Tübingen, Institut für Medizinische Mikrobiologie und Hygiene, Universitätsklinikum Tübingen                          | Angel Angelov; Angelov et al.                                                                                                                                                                                                                                                                                                                                                                                                                                                                                                                                                                                                          |
| EPI_ISL_572330, EPI_ISL_572331                                                                                                                                                                                                                                                                                                                                                                                                                                                                                                                                                                                                                                                                                                                                                                                                                                                                                                                                               | Institute for Virology, University Hospital Duesseldorf, Medical Faculty, Heinrich-Heine-University Duesseldorf                             | Institute for Virology, University Hospital Duesseldorf, Medical Faculty, Heinrich-Heine-University Duesseldorf                             | : Alexander Killer; Andreas Walker; Annemarie Mohring; Anselm Kunstein; Ansgar Schulz; Björn Jensen; Caroline Klindt; Edwin Böлке; Gerald Antoch; Heiner Schaal; Jennifer Neubert; Johannes Bode; Johannes C. Fischer; Jörg Timm; Lisa Müller; Maximilian Damagnez; Nadine Lübke; Ortwin Adams; Philipp Albrecht; Philipp Ostermann; Saskia Elben; Tina Senff; Tom Lüdde; Torsten Feldt; Verena Keitel                                                                                                                                                                                                                                 |
| EPI_ISL_602469, EPI_ISL_602470, EPI_ISL_602471, EPI_ISL_602479, EPI_ISL_602482, EPI_ISL_602485, EPI_ISL_602496, EPI_ISL_602497, EPI_ISL_602502, EPI_ISL_602503, EPI_ISL_626215, EPI_ISL_626220, EPI_ISL_626221, EPI_ISL_626222, EPI_ISL_626229                                                                                                                                                                                                                                                                                                                                                                                                                                                                                                                                                                                                                                                                                                                               | Institute for Virology, University Hospital Essen                                                                                           | Center of Medical Microbiology, Virology, and Hospital Hygiene, University of Duesseldorf                                                   | Alexander Dilthey; Andreas Walker; Daniel Strelow; Jessica Nicolai; Jörg Timm; Klaus Pfeffer; Lisanna Hülse; Malte Kohns Vasconcelos; Maximilian Damagnez; Nadine Lübke; Olympia E. Anastasiou; Tobias Wienemann; Torsten Houwaart; Ulf Dittmer                                                                                                                                                                                                                                                                                                                                                                                        |
| EPI_ISL_886157, EPI_ISL_887107, EPI_ISL_887108, EPI_ISL_887109, EPI_ISL_887110, EPI_ISL_887111, EPI_ISL_887112, EPI_ISL_887113, EPI_ISL_887114                                                                                                                                                                                                                                                                                                                                                                                                                                                                                                                                                                                                                                                                                                                                                                                                                               |                                                                                                                                             |                                                                                                                                             |                                                                                                                                                                                                                                                                                                                                                                                                                                                                                                                                                                                                                                        |
| see above                                                                                                                                                                                                                                                                                                                                                                                                                                                                                                                                                                                                                                                                                                                                                                                                                                                                                                                                                                    | Institute of Medical Microbiology and Virology, University Hospital Carl Gustav Carus, TU Dresden                                           | DRESDEN-concept Genome Center, CMCB, TU Dresden                                                                                             | Beil J.; Brown T.; Büttner L.; Gscheidel N.; Hochauf-Stange K.; Klemroth S.; Lindemann D.; Mehnert G.; Petzold A.; Reinhardt S.; Rost F.; Sameith K.; Winkler S.                                                                                                                                                                                                                                                                                                                                                                                                                                                                       |
| EPI_ISL_1964507                                                                                                                                                                                                                                                                                                                                                                                                                                                                                                                                                                                                                                                                                                                                                                                                                                                                                                                                                              | Institute of Microbiology and Immunology, Faculty of Medicine, University of Ljubljana                                                      | Institute of Microbiology and Immunology, Faculty of Medicine, University of Ljubljana                                                      | Alen Suljić; Andraž Celar; Dominika Šturm; Doroteja Vljaj; Mario Poljak; Matic Brvar; Miša Korva; Patricija Pozvek; Samo Zakotnik; Tatjana Avšič – Zupanc; Tomaž Mark Zorec; Špela Pleh                                                                                                                                                                                                                                                                                                                                                                                                                                                |
| EPI_ISL_402123                                                                                                                                                                                                                                                                                                                                                                                                                                                                                                                                                                                                                                                                                                                                                                                                                                                                                                                                                               | Institute of Pathogen Biology, Chinese Academy of Medical Sciences & Peking Union Medical College                                           | Institute of Pathogen Biology, Chinese Academy of Medical Sciences & Peking Union Medical College                                           | Chao Wu; Jianwei Wang; Lili Ren; Qi Jin; Yiwei Liu; Zhiqiang Wu; Zichun Xiang                                                                                                                                                                                                                                                                                                                                                                                                                                                                                                                                                          |
| EPI_ISL_852636, EPI_ISL_852638, EPI_ISL_852640, EPI_ISL_852644, EPI_ISL_852646, EPI_ISL_852650, EPI_ISL_852651, EPI_ISL_852652, EPI_ISL_852653, EPI_ISL_852654, EPI_ISL_852655, EPI_ISL_852656, EPI_ISL_852657, EPI_ISL_852658, EPI_ISL_852661, EPI_ISL_852663, EPI_ISL_852673, EPI_ISL_852687, EPI_ISL_852688, EPI_ISL_852690, EPI_ISL_852703, EPI_ISL_852705, EPI_ISL_852706, EPI_ISL_852721, EPI_ISL_852727, EPI_ISL_852731, EPI_ISL_852750, EPI_ISL_852754, EPI_ISL_852760, EPI_ISL_852763, EPI_ISL_852768, EPI_ISL_852771, EPI_ISL_852783, EPI_ISL_852793, EPI_ISL_852795, EPI_ISL_852799, EPI_ISL_852805, EPI_ISL_852806, EPI_ISL_852807, EPI_ISL_852809, EPI_ISL_893757, EPI_ISL_893769, EPI_ISL_918347, EPI_ISL_918355, EPI_ISL_1195352, EPI_ISL_1195355, EPI_ISL_1195357, EPI_ISL_1195362, EPI_ISL_1195365, EPI_ISL_1195403, EPI_ISL_1195405, EPI_ISL_1195406, EPI_ISL_1357673, EPI_ISL_1588642, EPI_ISL_1588655, EPI_ISL_1588662, EPI_ISL_1588670, EPI_ISL_2535426 | Institute of Virology, Clinical Virus Genomics, Medical Center, University of Freiburg, Freiburg, Germany                                   | Hajo Grundmann; Jonas Fuchs; Lena Jaki; Lisa Kern; Marcus Panning; Sandra Reuter                                                            |                                                                                                                                                                                                                                                                                                                                                                                                                                                                                                                                                                                                                                        |
| see above                                                                                                                                                                                                                                                                                                                                                                                                                                                                                                                                                                                                                                                                                                                                                                                                                                                                                                                                                                    | Institute of Virology, Medical Center, University of Freiburg, Freiburg, Germany                                                            |                                                                                                                                             |                                                                                                                                                                                                                                                                                                                                                                                                                                                                                                                                                                                                                                        |
| EPI_ISL_983503, EPI_ISL_983514, EPI_ISL_983523, EPI_ISL_983525, EPI_ISL_983537, EPI_ISL_983554, EPI_ISL_983566, EPI_ISL_983571, EPI_ISL_983582, EPI_ISL_983587                                                                                                                                                                                                                                                                                                                                                                                                                                                                                                                                                                                                                                                                                                                                                                                                               |                                                                                                                                             |                                                                                                                                             |                                                                                                                                                                                                                                                                                                                                                                                                                                                                                                                                                                                                                                        |
| see above                                                                                                                                                                                                                                                                                                                                                                                                                                                                                                                                                                                                                                                                                                                                                                                                                                                                                                                                                                    | Institute of Virology, University Hospital, University of Bonn and German Center for Infection Research (DZIF), Bonn-Cologne, Bonn, Germany | Institute of Virology, University Hospital, University of Bonn and German Center for Infection Research (DZIF), Bonn-Cologne, Bonn, Germany | Marek Korencak et al                                                                                                                                                                                                                                                                                                                                                                                                                                                                                                                                                                                                                   |
| EPI_ISL_796028, EPI_ISL_796034, EPI_ISL_796043, EPI_ISL_796044                                                                                                                                                                                                                                                                                                                                                                                                                                                                                                                                                                                                                                                                                                                                                                                                                                                                                                               | Institute of Virology, University of Cologne                                                                                                | Institute of Virology, University of Cologne                                                                                                | Alex Thielen; Alexander Dilthey; Andreas Walker; Dominik Aschenmeier; Elena Knops; Eva Heger; Gibran Rubio; Jörg Timm; Martin Däumer; Maximilian Damagnez; Rolf Kaiser; Saleta Sierra; Zevanya Tesselonica                                                                                                                                                                                                                                                                                                                                                                                                                             |
| EPI_ISL_732019, EPI_ISL_861579                                                                                                                                                                                                                                                                                                                                                                                                                                                                                                                                                                                                                                                                                                                                                                                                                                                                                                                                               | Instituto Nacional de Saude (INSA)                                                                                                          | Instituto Nacional de Saude (INSA)                                                                                                          | Borges et al                                                                                                                                                                                                                                                                                                                                                                                                                                                                                                                                                                                                                           |
| EPI_ISL_1854421, EPI_ISL_1854424                                                                                                                                                                                                                                                                                                                                                                                                                                                                                                                                                                                                                                                                                                                                                                                                                                                                                                                                             | Instituto Nacional de Saude (INSA) and Centro de Investigação em Biodiversidade e Recursos Geneticos (CIBIO), Universidade do Porto         | Instituto Nacional de Saude (INSA) and Centro de Investigação em Biodiversidade e Recursos Geneticos (CIBIO), Universidade do Porto         | Borges et al                                                                                                                                                                                                                                                                                                                                                                                                                                                                                                                                                                                                                           |
| EPI_ISL_2004304, EPI_ISL_2004305                                                                                                                                                                                                                                                                                                                                                                                                                                                                                                                                                                                                                                                                                                                                                                                                                                                                                                                                             | Instituto Nacional de Saude (INSA) and i3S - Instituto de Investigação e Inovação em Saúde                                                  | Instituto Nacional de Saude (INSA)                                                                                                          | Borges et al                                                                                                                                                                                                                                                                                                                                                                                                                                                                                                                                                                                                                           |
| EPI_ISL_1322217                                                                                                                                                                                                                                                                                                                                                                                                                                                                                                                                                                                                                                                                                                                                                                                                                                                                                                                                                              | IrsiCaixa                                                                                                                                   | IrsiCaixa                                                                                                                                   | Bonaventura Clotet; Bonaventura Clotet Gloria Trujillo; Carolina Gonzalez Fernandez; Eulalia Grau; Francesc Catala-Moll; Jaume Trape Pujol; Marc Noguera-Julian; Maria Casadella; Mariona Parera; Pilar Armengol; Rafel Perez Vidal; Roger Paredes                                                                                                                                                                                                                                                                                                                                                                                     |
| EPI_ISL_1254970, EPI_ISL_2465043, EPI_ISL_2465052, EPI_ISL_2465056, EPI_ISL_2465066, EPI_ISL_2465100                                                                                                                                                                                                                                                                                                                                                                                                                                                                                                                                                                                                                                                                                                                                                                                                                                                                         | Istituto Zooprofilattico Sperimentale del Mezzogiorno                                                                                       | Telethon Institute of Genetics and Medicine (TIGEM)                                                                                         | Antonio Grimaldi Patrizia Annunziata Francesco Panariello Biancamaria Pierri Claudia Tiberio Valentina Bouche Chiara Colantuono Maria Concetta Cuomo Denise Di Concilio Lucio Di Filippo Anna Manfredi Marcello Salvi Antonio Limone Luigi Atripaldi Pellegrino Cerino Andrea Ballabio Davide Cacchiarelli; Antonio Grimaldi Patrizia Annunziata Francesco Panariello Biancamaria Pierri Claudia Tiberio Teresa Giuliano Valentina Bouche Chiara Colantuono Maria Concetta Cuomo Denise Di Concilio Lucio Di Filippo Anna Manfredi Marcello Salvi Antonio Limone Luigi Atripaldi Pellegrino Cerino Andrea Ballabio Davide Cacchiarelli |
| EPI_ISL_1627357                                                                                                                                                                                                                                                                                                                                                                                                                                                                                                                                                                                                                                                                                                                                                                                                                                                                                                                                                              | Istituto Zooprofilattico Sperimentale della Puglia e della Basilicata                                                                       | Istituto Zooprofilattico Sperimentale della Puglia e della Basilicata                                                                       | Bianco A.; Capozzi L.; Del Sambio L.; Galante D.; Pace L.; Parisi A.; Simone D.                                                                                                                                                                                                                                                                                                                                                                                                                                                                                                                                                        |
| EPI_ISL_949019, EPI_ISL_949022                                                                                                                                                                                                                                                                                                                                                                                                                                                                                                                                                                                                                                                                                                                                                                                                                                                                                                                                               | Jessa                                                                                                                                       | Jessa                                                                                                                                       | Jessa_cmdLab                                                                                                                                                                                                                                                                                                                                                                                                                                                                                                                                                                                                                           |
| EPI_ISL_912426, EPI_ISL_1049113, EPI_ISL_2404608                                                                                                                                                                                                                                                                                                                                                                                                                                                                                                                                                                                                                                                                                                                                                                                                                                                                                                                             | KU Leuven, Rega Institute, Clinical and Epidemiological Virology                                                                            | KU Leuven, Rega Institute, Clinical and Epidemiological Virology                                                                            | Bert Vanmechelen; Joan Marti-Carreras; Piet Maes; Tony Wawina-Bokalanga                                                                                                                                                                                                                                                                                                                                                                                                                                                                                                                                                                |
| EPI_ISL_1008002                                                                                                                                                                                                                                                                                                                                                                                                                                                                                                                                                                                                                                                                                                                                                                                                                                                                                                                                                              | Klinikum Wels-Grieskirchen                                                                                                                  | Bergthaler laboratory, CeMM Research Center for Molecular Medicine of the Austrian Academy of Sciences                                      | Andreas Bergthaler; Anna Schedl; Bekir Erguner; Benedikt Agerer; Christoph Bock; Jan Laine; Lukas Endler; Maelle Le Moing; Martin Senekowitsch; Michael Schuster; Thomas Penz                                                                                                                                                                                                                                                                                                                                                                                                                                                          |
| EPI_ISL_1168141                                                                                                                                                                                                                                                                                                                                                                                                                                                                                                                                                                                                                                                                                                                                                                                                                                                                                                                                                              | Klinisk mikrobiologi                                                                                                                        | The Public Health Agency of Sweden                                                                                                          | Anna Risberg; Anna-Malin Linde; Carlo Berg; Karin Tegmark-Wisell; Maria Lind Karlberg; Mattias Haukland; Mia Brytting; Noura Walai; Oskar Karlsson Lindsjo; Petra Edquist; Petra Holmstrom; Reza Advani; Sofia Stamouli                                                                                                                                                                                                                                                                                                                                                                                                                |
| EPI_ISL_1150225, EPI_ISL_1847472                                                                                                                                                                                                                                                                                                                                                                                                                                                                                                                                                                                                                                                                                                                                                                                                                                                                                                                                             | LabKom - Labor Augsburg MVZ GmbH                                                                                                            | Robert Koch Institute                                                                                                                       |                                                                                                                                                                                                                                                                                                                                                                                                                                                                                                                                                                                                                                        |
| EPI_ISL_1211099                                                                                                                                                                                                                                                                                                                                                                                                                                                                                                                                                                                                                                                                                                                                                                                                                                                                                                                                                              | LabKom - Labor Mainz MVZ GmbH                                                                                                               | Robert Koch Institute                                                                                                                       |                                                                                                                                                                                                                                                                                                                                                                                                                                                                                                                                                                                                                                        |
| EPI_ISL_860874, EPI_ISL_860885                                                                                                                                                                                                                                                                                                                                                                                                                                                                                                                                                                                                                                                                                                                                                                                                                                                                                                                                               | Labo Analyses Med                                                                                                                           | National Reference Center for Viruses of Respiratory Infections, Institut Pasteur, Paris                                                    | Angela Brisebarre; Camille Capel; Etienne Simon-Lorière; Lefauvre Brieuc; Marion Barbet; Maud Vanpeene; Méline Bizard; Sylvie Behillili; Sylvie van der Werf; Vincent Enouf                                                                                                                                                                                                                                                                                                                                                                                                                                                            |
| EPI_ISL_1843681                                                                                                                                                                                                                                                                                                                                                                                                                                                                                                                                                                                                                                                                                                                                                                                                                                                                                                                                                              | Labor 28 MVZ GmbH                                                                                                                           | Robert Koch Institute                                                                                                                       |                                                                                                                                                                                                                                                                                                                                                                                                                                                                                                                                                                                                                                        |
| EPI_ISL_1982602, EPI_ISL_1988174, EPI_ISL_1988175, EPI_ISL_1988203, EPI_ISL_1988225, EPI_ISL_1989460, EPI_ISL_1989665                                                                                                                                                                                                                                                                                                                                                                                                                                                                                                                                                                                                                                                                                                                                                                                                                                                        |                                                                                                                                             |                                                                                                                                             |                                                                                                                                                                                                                                                                                                                                                                                                                                                                                                                                                                                                                                        |
| see above                                                                                                                                                                                                                                                                                                                                                                                                                                                                                                                                                                                                                                                                                                                                                                                                                                                                                                                                                                    | Labor Berlin Charité Vivantes GmbH / Institut für Virologie                                                                                 | Charité Universitätsmedizin Berlin, Institut für Virologie/Labor Berlin                                                                     | Barbara Mühlemann; Christian Drosten; Christine Stephan; Peter Menzel; Rolf Schwarzer; Terry Jones; Victor M Corman                                                                                                                                                                                                                                                                                                                                                                                                                                                                                                                    |
| EPI_ISL_1144324                                                                                                                                                                                                                                                                                                                                                                                                                                                                                                                                                                                                                                                                                                                                                                                                                                                                                                                                                              | Labor Blackholm MVZ                                                                                                                         | Robert Koch Institute                                                                                                                       |                                                                                                                                                                                                                                                                                                                                                                                                                                                                                                                                                                                                                                        |
| EPI_ISL_1861845, EPI_ISL_1861941, EPI_ISL_1861996, EPI_ISL_1862183, EPI_ISL_2384489                                                                                                                                                                                                                                                                                                                                                                                                                                                                                                                                                                                                                                                                                                                                                                                                                                                                                          | Labor Dr. Fenner und Kollegen                                                                                                               | Heinrich Pette Institute, Leibniz Institute for Experimental Virology                                                                       | Adam Grundhoff; Alexis Robitaille; Johannes Knobloch; Martin Aepfelbacher; Nicole Fischer; Thomas Günther                                                                                                                                                                                                                                                                                                                                                                                                                                                                                                                              |

|                                                      |                                                                                     |                                                                                                                                                                                                                                                                                                                                                                                                                                                                                                                                                                                                                                                                                                                                                                                                                                                                                                                                                                                                                                                                                                                                                                                                                                                                                                                                                                                                                                                                                                                                                                                                                                                                                                                                                                                                                                                                                                                                                                                                                                                                                                                                                                                                                                                                                                                                                                                                                                                                                                                                                                                                                                                                                                                                                                                                                                                                                                                                                                                                                                                                                                                                                                                                                                                                                                                                                                                                                                                                                                                                                                                                                                                                                                                                                                                                                                                                                                                                                                                                                                                                                                                                                                                                                                                                                                                                                                                                                                                                                                                                                                                                                                                                                                                                                                                                                                                                                                                                                                                                                                                                                                                                                                                                                                                                                                                                                                                                                                                                                                                                                                                                                                                                                                                                                                                                                        |                                                                                                                                                                                                                                                                                                                                                                                                                                                                                                                                                                                                                                                                                                                                                                                                                                                                                                                                                                                                                                                                                                                                                                                                                                                                                                                                                                                                                                                                                                                                                                                                                                                                                                                                                                                                                                                                                                                                                                                                                                                                                                                                                                                                                                                                                                                                                                                                                                                                                                                                                                                                                                                                                                                                                                                                                                                                                                                                                                                                                                                                                                                                                                                                                                                                                                                                                                                                                                                                                                                                                                                                                                                                                                                                                                                                                                                                                                                                                                                                                                                                                                                                                                                                                                                                                                                                                                                                                                                                                                                                                                                                                                                                                                                                                                                                                                                                                                                                                                                                                                                                                                                                                                                                                                                                                                                                                                                                                                                                                                                                                                                                                                                                                                                                                                                                                                                                                                                                                                                                                                                                                                                                                                                                                                                                                                                                                                                                                                                                                                                                                                                                                                                                                                                                                                                |
|------------------------------------------------------|-------------------------------------------------------------------------------------|------------------------------------------------------------------------------------------------------------------------------------------------------------------------------------------------------------------------------------------------------------------------------------------------------------------------------------------------------------------------------------------------------------------------------------------------------------------------------------------------------------------------------------------------------------------------------------------------------------------------------------------------------------------------------------------------------------------------------------------------------------------------------------------------------------------------------------------------------------------------------------------------------------------------------------------------------------------------------------------------------------------------------------------------------------------------------------------------------------------------------------------------------------------------------------------------------------------------------------------------------------------------------------------------------------------------------------------------------------------------------------------------------------------------------------------------------------------------------------------------------------------------------------------------------------------------------------------------------------------------------------------------------------------------------------------------------------------------------------------------------------------------------------------------------------------------------------------------------------------------------------------------------------------------------------------------------------------------------------------------------------------------------------------------------------------------------------------------------------------------------------------------------------------------------------------------------------------------------------------------------------------------------------------------------------------------------------------------------------------------------------------------------------------------------------------------------------------------------------------------------------------------------------------------------------------------------------------------------------------------------------------------------------------------------------------------------------------------------------------------------------------------------------------------------------------------------------------------------------------------------------------------------------------------------------------------------------------------------------------------------------------------------------------------------------------------------------------------------------------------------------------------------------------------------------------------------------------------------------------------------------------------------------------------------------------------------------------------------------------------------------------------------------------------------------------------------------------------------------------------------------------------------------------------------------------------------------------------------------------------------------------------------------------------------------------------------------------------------------------------------------------------------------------------------------------------------------------------------------------------------------------------------------------------------------------------------------------------------------------------------------------------------------------------------------------------------------------------------------------------------------------------------------------------------------------------------------------------------------------------------------------------------------------------------------------------------------------------------------------------------------------------------------------------------------------------------------------------------------------------------------------------------------------------------------------------------------------------------------------------------------------------------------------------------------------------------------------------------------------------------------------------------------------------------------------------------------------------------------------------------------------------------------------------------------------------------------------------------------------------------------------------------------------------------------------------------------------------------------------------------------------------------------------------------------------------------------------------------------------------------------------------------------------------------------------------------------------------------------------------------------------------------------------------------------------------------------------------------------------------------------------------------------------------------------------------------------------------------------------------------------------------------------------------------------------------------------------------------------------------------------------------------------------------------------------------|--------------------------------------------------------------------------------------------------------------------------------------------------------------------------------------------------------------------------------------------------------------------------------------------------------------------------------------------------------------------------------------------------------------------------------------------------------------------------------------------------------------------------------------------------------------------------------------------------------------------------------------------------------------------------------------------------------------------------------------------------------------------------------------------------------------------------------------------------------------------------------------------------------------------------------------------------------------------------------------------------------------------------------------------------------------------------------------------------------------------------------------------------------------------------------------------------------------------------------------------------------------------------------------------------------------------------------------------------------------------------------------------------------------------------------------------------------------------------------------------------------------------------------------------------------------------------------------------------------------------------------------------------------------------------------------------------------------------------------------------------------------------------------------------------------------------------------------------------------------------------------------------------------------------------------------------------------------------------------------------------------------------------------------------------------------------------------------------------------------------------------------------------------------------------------------------------------------------------------------------------------------------------------------------------------------------------------------------------------------------------------------------------------------------------------------------------------------------------------------------------------------------------------------------------------------------------------------------------------------------------------------------------------------------------------------------------------------------------------------------------------------------------------------------------------------------------------------------------------------------------------------------------------------------------------------------------------------------------------------------------------------------------------------------------------------------------------------------------------------------------------------------------------------------------------------------------------------------------------------------------------------------------------------------------------------------------------------------------------------------------------------------------------------------------------------------------------------------------------------------------------------------------------------------------------------------------------------------------------------------------------------------------------------------------------------------------------------------------------------------------------------------------------------------------------------------------------------------------------------------------------------------------------------------------------------------------------------------------------------------------------------------------------------------------------------------------------------------------------------------------------------------------------------------------------------------------------------------------------------------------------------------------------------------------------------------------------------------------------------------------------------------------------------------------------------------------------------------------------------------------------------------------------------------------------------------------------------------------------------------------------------------------------------------------------------------------------------------------------------------------------------------------------------------------------------------------------------------------------------------------------------------------------------------------------------------------------------------------------------------------------------------------------------------------------------------------------------------------------------------------------------------------------------------------------------------------------------------------------------------------------------------------------------------------------------------------------------------------------------------------------------------------------------------------------------------------------------------------------------------------------------------------------------------------------------------------------------------------------------------------------------------------------------------------------------------------------------------------------------------------------------------------------------------------------------------------------------------------------------------------------------------------------------------------------------------------------------------------------------------------------------------------------------------------------------------------------------------------------------------------------------------------------------------------------------------------------------------------------------------------------------------------------------------------------------------------------------------------------------------------------------------------------------------------------------------------------------------------------------------------------------------------------------------------------------------------------------------------------------------------------------------------------------------------------------------------------------------------------------------------------------------------------|
| EPI_ISL_1844609<br>EPI_ISL_1847412<br>EPI_ISL_831384 | Labor Dr. Heidrich & Kollegen MVZ GmbH Hamburg<br>Labor Dr. Spranger<br>Labor Krone | Robert Koch Institute<br>Robert Koch Institute<br>Robert Koch Institute, Influenza and respiratory viruses FG17 & Bioinformatics MF1, Berlin, Germany<br>Robert Koch Institute<br>Robert Koch Institute<br>Laboratoire de santé publique du Québec<br>Laboratoire national de sante, Microbiology, Virology<br>Laboratoire national de santé, Microbiology, Virology<br>Laboratorio Biologia molecolare dell'Istituto di Medicina Aerospaziale di Roma<br>Laboratorio de Microbiologia. Hospital General Universitario de Elda, Alicante<br>Laboratorio di Diagnostica Molecolare<br>Laboratorium Diagnostyi Mikrobiologicznej z Pracownią Prątką Grzłączy SP5zW im. Jana Bożego w Lublinie<br>Laboratorium Mikrobiologiczne Dołnośląskie Centrum Transplantacji Komórkowych z Krajowym Bankiem Dawców Szpiku<br>Laboratory of Clinical Microbiology, Virology and Bioemergencies, ASST Fatebenefratelli Sacco - Sacco Hospital<br>Laboratory of Clinical Virology<br>Landesamt für Verbraucherschutz Sachsen Anhalt, Magdeburg<br>Lapland Central Hospital<br>see above<br>EPI_ISL_566399, EPI_ISL_580436, EPI_ISL_580600, EPI_ISL_586666, EPI_ISL_586741, EPI_ISL_587746, EPI_ISL_587966, EPI_ISL_598072, EPI_ISL_598247, EPI_ISL_606083, EPI_ISL_607693, EPI_ISL_607770, EPI_ISL_607802, EPI_ISL_608231, EPI_ISL_609004, EPI_ISL_610997, EPI_ISL_611160, EPI_ISL_624468, EPI_ISL_624489, EPI_ISL_624554, EPI_ISL_624667, EPI_ISL_624769, EPI_ISL_625107, EPI_ISL_625254, EPI_ISL_630450, EPI_ISL_630519, EPI_ISL_630640, EPI_ISL_630756<br>see above<br>EPI_ISL_643499, EPI_ISL_643664, EPI_ISL_643668, EPI_ISL_643730, EPI_ISL_643767, EPI_ISL_643782, EPI_ISL_645509, EPI_ISL_645897, EPI_ISL_647716, EPI_ISL_656718, EPI_ISL_656817, EPI_ISL_659153, EPI_ISL_659389, EPI_ISL_672919, EPI_ISL_673023, EPI_ISL_705144, EPI_ISL_709877, EPI_ISL_719019, EPI_ISL_719143, EPI_ISL_756680, EPI_ISL_769041, EPI_ISL_777869, EPI_ISL_782920, EPI_ISL_800390, EPI_ISL_800410, EPI_ISL_994517<br>see above<br>EPI_ISL_581396, EPI_ISL_596952, EPI_ISL_597060, EPI_ISL_597237, EPI_ISL_597295, EPI_ISL_597437, EPI_ISL_601571, EPI_ISL_608412, EPI_ISL_608446, EPI_ISL_608501, EPI_ISL_608536, EPI_ISL_608608, EPI_ISL_608947, EPI_ISL_608969, EPI_ISL_609023, EPI_ISL_609114, EPI_ISL_609636, EPI_ISL_609659, EPI_ISL_609753, EPI_ISL_610641, EPI_ISL_610705, EPI_ISL_610778, EPI_ISL_610792, EPI_ISL_623386, EPI_ISL_623537, EPI_ISL_623643, EPI_ISL_631142, EPI_ISL_631177, EPI_ISL_633214, EPI_ISL_633357, EPI_ISL_634802<br>see above<br>EPI_ISL_641792, EPI_ISL_642284, EPI_ISL_642708, EPI_ISL_643121, EPI_ISL_643140, EPI_ISL_643251, EPI_ISL_643299, EPI_ISL_646496, EPI_ISL_647895, EPI_ISL_647944, EPI_ISL_655864, EPI_ISL_657129, EPI_ISL_661428, EPI_ISL_661613, EPI_ISL_661766, EPI_ISL_661910, EPI_ISL_662449, EPI_ISL_662957, EPI_ISL_719929, EPI_ISL_721000, EPI_ISL_721030, EPI_ISL_721078, EPI_ISL_736695, EPI_ISL_782640, see above<br>EPI_ISL_530825, EPI_ISL_530866, EPI_ISL_536932, EPI_ISL_540002, EPI_ISL_540089, EPI_ISL_540331, EPI_ISL_540347, EPI_ISL_549610, EPI_ISL_549649, EPI_ISL_549753, EPI_ISL_567047, EPI_ISL_567095, EPI_ISL_567148, EPI_ISL_567300, EPI_ISL_568229, EPI_ISL_568269, EPI_ISL_568340, EPI_ISL_568343, EPI_ISL_568446, EPI_ISL_568464, EPI_ISL_575381, EPI_ISL_579881, EPI_ISL_581068, EPI_ISL_587431, EPI_ISL_587578, EPI_ISL_587695, EPI_ISL_588145, EPI_ISL_588204, EPI_ISL_588841, EPI_ISL_588854, EPI_ISL_588969, EPI_ISL_590577, EPI_ISL_590606, EPI_ISL_590624, EPI_ISL_598917, EPI_ISL_598946, EPI_ISL_599163, EPI_ISL_599445, EPI_ISL_599450, EPI_ISL_599481, EPI_ISL_599537, EPI_ISL_599691, EPI_ISL_599807, EPI_ISL_600171, EPI_ISL_600224, EPI_ISL_600333, EPI_ISL_600485, EPI_ISL_600509, EPI_ISL_600551, EPI_ISL_600615, EPI_ISL_600629, EPI_ISL_600633, EPI_ISL_600653, EPI_ISL_600678, EPI_ISL_600680, EPI_ISL_600689, EPI_ISL_600752, EPI_ISL_600756, EPI_ISL_600939, EPI_ISL_601024, EPI_ISL_601050, EPI_ISL_601056, EPI_ISL_601074, EPI_ISL_601180, EPI_ISL_601229, EPI_ISL_601233, EPI_ISL_601332, EPI_ISL_629760, EPI_ISL_629968, EPI_ISL_633508, EPI_ISL_633665, EPI_ISL_634714<br>see above<br>EPI_ISL_540824, EPI_ISL_585378<br>EPI_ISL_642781, EPI_ISL_642782, EPI_ISL_642858, EPI_ISL_642902, EPI_ISL_643022, EPI_ISL_643034, EPI_ISL_649205, EPI_ISL_649479, EPI_ISL_657627, EPI_ISL_658862, EPI_ISL_659063, EPI_ISL_659096, EPI_ISL_675550, EPI_ISL_709674, EPI_ISL_760943, EPI_ISL_762452, EPI_ISL_783115, EPI_ISL_783328, EPI_ISL_789891, EPI_ISL_864278, EPI_ISL_945239<br>see above<br>EPI_ISL_550549, EPI_ISL_550856, EPI_ISL_550916, EPI_ISL_550958, EPI_ISL_551665, EPI_ISL_551678, EPI_ISL_551729, EPI_ISL_551734, EPI_ISL_551995, EPI_ISL_552135, EPI_ISL_552158, EPI_ISL_552229, EPI_ISL_552440, EPI_ISL_552518, EPI_ISL_552529, EPI_ISL_552715, EPI_ISL_553047, EPI_ISL_553111, EPI_ISL_566512, EPI_ISL_566578, EPI_ISL_566594, EPI_ISL_566649, EPI_ISL_566681, EPI_ISL_575781, EPI_ISL_575984, EPI_ISL_580639, EPI_ISL_581145, EPI_ISL_581283, EPI_ISL_589266, EPI_ISL_598275, EPI_ISL_598403, EPI_ISL_598415, EPI_ISL_598439, EPI_ISL_598690, EPI_ISL_598757, EPI_ISL_598818, EPI_ISL_599840, EPI_ISL_599887, EPI_ISL_600020, EPI_ISL_600038, EPI_ISL_600089, EPI_ISL_600102, EPI_ISL_600113, EPI_ISL_601340, EPI_ISL_601500, EPI_ISL_601524, EPI_ISL_601562, EPI_ISL_601576, EPI_ISL_601759, EPI_ISL_606305, EPI_ISL_606555, EPI_ISL_606596, EPI_ISL_606683, EPI_ISL_606780, EPI_ISL_606836, EPI_ISL_606870, EPI_ISL_606880, EPI_ISL_623396, EPI_ISL_623465, EPI_ISL_629132, EPI_ISL_629346, EPI_ISL_629364, EPI_ISL_629365, EPI_ISL_629374, EPI_ISL_629612, EPI_ISL_629647, EPI_ISL_629675, EPI_ISL_630047, EPI_ISL_630060, EPI_ISL_630171, EPI_ISL_630262, EPI_ISL_634449<br>see above<br>EPI_ISL_1142171<br>EPI_ISL_838511 | Robert Koch Institute<br>Robert Koch Institute<br>Robert Koch Institute, Influenza and respiratory viruses FG17 & Bioinformatics MF1, Berlin, Germany<br>Robert Koch Institute<br>Robert Koch Institute<br>Laboratoire de santé publique du Québec<br>Guillaume Bourque; Ioannis Ragoussis; Jesse Shapiro; Mark Lathrop and Michel Roger on behalf of the CoVSeQ research group; Sandrine Moreira<br>Anke Wienecke-Baldacchino; Catherine Ragimbeau; Fatu Djabi; Jessica Tapp; Lise Pignon; Raoul Salmon; Tamir Abdelrahman; Trung Nguyen Nguyen<br>Anke Wienecke-Baldacchino; Catherine Ragimbeau; Fatu Djabi; Jessica Tapp; Lise Pignon; Raoul Salmon; Tamir Abdelrahman<br>Anella Monte; Anna Anselmo; Antonella Fortunato; Carmelo Campanella; Carmen Nigro; Filippo Molinari; Florigio Lista; Francesco Giordani; Giancarlo Petralito; Gandomenico Cerreto; Giulia Campoli; Lucia Nicosia; Maria Gravina; Marzia Cavalli; Mattia Rencrřcca; Mirko Tavernese; Raffaele Cresta; Riccardo De Sanctis; Rossella Brandi; Sara Felici; Silvia Fillo; Tania Pistoni; Vanessa Vera Fain<br>SeqCOVID-SPAIN consortium/IBV(CSIC)<br>Cristina Torregrosa Hetland; Eva Pastor Boix; Mª Isabel Gascón Ros; Paloma Cascales Ramos; Pedro Garcinuño Enríquez; Salvador Raga Borja and SeqCOVID-SPAIN consortium<br>Virology Laboratory, Scientific Department, Army Medical Center<br>Anella Monte; Anna Anselmo; Antonella Fortunato; Federica Nuccio; Filippo Molinari; Florigio Lista; Francesco Colaci; Francesco Giordani; Giancarlo Petralito; Gandomenico Cerreto; Manuel Francesca; Mario Tucciarone; Riccardo De Sanctis; Silvia Fillo; Vanessa Vera Fain<br>National Institute of Public Health - National Institute of Hygiene<br>Gawor Jan; Wolkowicz Tomasz; Zacharczuk Katarzyna<br>1. Academic Center for Pathomorphological and Genetic-Molecular Diagnostics Ltd, Białystok, Poland 2. National Institute of Public Health - National Institute of Hygiene, Warsaw, Poland<br>Anetta Sulewska; Jacek Nikliński; Janusz Dzieciół; Joanna Kiśluk; Katarzyna Zacharczuk; Konrad Raczkowski; Magdalena Nowakowska; Małgorzata Sadkowska-Todys; Piotr Karabowicz; Piotr Majewski; Przemysław Bieчек. Joanna Reszeć; Radosław Charkiewicz; Tomasz Wolkowicz<br>Laboratory of Clinical Microbiology, Virology and Bioemergencies, ASST Fatebenefratelli Sacco - Sacco Hospital<br>Alberto Rizzo; Alessandro Mancon; Fiorenza Bracchitta; Luca Rizzuto; Maria Rita Gismondo; Valeria Micheli<br>Greek Genome Center, Biomedical Research Foundation of the Academy of Athens (BRFAA)<br>Dimitrios Thanos; Emmanouil Athanasiadis; George Sourvinos; Gianni Vatsellas; Katerina Zoi; Theodoros Loupis<br>Institute of Medical Microbiology and Hospital Hygiene<br>Aljoscha Tersteegen; Prof. Dr. Achim Kaasch<br>Department of Virology, University of Helsinki and Helsinki University Hospital, Helsinki, Finland<br>Hannimari Kallio-Kokko; Olli Vapalahti; Suvi Kuivanen; Teemu Smura<br>Wellcome Sanger Institute for the COVID-19 Genomics UK (COG-UK) Consortium<br>Cordelia Langford; David K. Jackson; Dominic Kwiatkowski; Ewan Harrison; Ian Johnston; Jacquelyn Wynn; Jeffrey Barrett; John Sillitoe on behalf of the Wellcome Sanger Institute COVID-19 Surveillance Team; John Sillitoe on behalf of the Wellcome Sanger Institute COVID-19 Surveillance Team (http://www.sanger.ac.uk/covid-team); Mairead Hyland; Roberto Amato; Sonia Goncalves; The Lighthouse Lab in Alderley Park and Alex Alderton<br>Wellcome Sanger Institute for the COVID-19 Genomics UK (COG-UK) consortium<br>Cordelia Langford; David K. Jackson; Dominic Kwiatkowski; Ewan Harrison; Ian Johnston; Jacquelyn Wynn; John Sillitoe on behalf of the Wellcome Sanger Institute COVID-19 Surveillance Team; John Sillitoe on behalf of the Wellcome Sanger Institute COVID-19 Surveillance Team (http://www.sanger.ac.uk/covid-team); Mairead Hyland; Roberto Amato; Sonia Goncalves; The Lighthouse Lab in Alderley Park and Alex Alderton<br>Wellcome Sanger Institute for the COVID-19 Genomics UK (COG-UK) Consortium<br>Cordelia Langford; David K. Jackson; Dominic Kwiatkowski; Ewan Harrison; Ian Johnston; John Sillitoe on behalf of the Wellcome Sanger Institute COVID-19 Surveillance Team; Rob Howes; Roberto Amato; Sonia Goncalves; The Lighthouse Lab in Cambridge and Alex Alderton<br>Wellcome Sanger Institute for the COVID-19 Genomics UK (COG-UK) consortium<br>Cordelia Langford; David K. Jackson; Dominic Kwiatkowski; Ewan Harrison; Ian Johnston; John Sillitoe on behalf of the Wellcome Sanger Institute COVID-19 Surveillance Team (http://www.sanger.ac.uk/covid-team); Rob Howes; Roberto Amato; Sonia Goncalves; The Lighthouse Lab in Cambridge and Alex Alderton<br>Wellcome Sanger Institute for the COVID-19 Genomics UK (COG-UK) Consortium<br>Anna Dominiczak and Alex Alderton; Carol Clugston; Cordelia Langford; David Gray; David K. Jackson; Dominic Kwiatkowski; Ewan Harrison; Harper VanSteenhouse; Ian Johnston; John Sillitoe on behalf of the Wellcome Sanger Institute COVID-19 Surveillance Team; Roberto Amato; Sonia Goncalves; Yumi Kasai<br>Wellcome Sanger Institute for the COVID-19 Genomics UK (COG-UK) consortium<br>Anna Dominiczak; Ana da Silva Filipe; Anna Dominiczak; Antonia Ho; Carol Clugston; Daniel Mair; David Gray; David L Robertson; Elihu Aranday-Cortes; Emma Thomson; Harper VanSteenhouse; James Shepherd; Jenna Nichols; Joseph Hughes; Kathy Li; Kathy Smollett; Kyriaki Nomikou; Lily Tong; Marc Niebel; Matthew Holden; Natasha Jesudason; Natasha Johnson; Patawee Asamaphan; Rajiv Shah; Richard Orton; Rory Gunson; Sarah McDonald; Sharif Shaaban; Sreenu Vattipally; Stephen Carmichael; Yumi Kasai<br>Wellcome Sanger Institute for the COVID-19 Genomics UK (COG-UK) Consortium<br>Cordelia Langford; David K. Jackson; Dominic Kwiatkowski; Ewan Harrison; Ian Johnston; John Sillitoe on behalf of the Wellcome Sanger Institute COVID-19 Surveillance Team (http://www.sanger.ac.uk/covid-team); Roberto Amato; Sonia Goncalves; The Lighthouse Lab in Milton Keynes and Alex Alderton<br>Wellcome Sanger Institute for the COVID-19 Genomics UK (COG-UK) consortium<br>Cordelia Langford; David K. Jackson; Dominic Kwiatkowski; Ewan Harrison; Ian Johnston; John Sillitoe on behalf of the Wellcome Sanger Institute COVID-19 Surveillance Team (http://www.sanger.ac.uk/covid-team); Roberto Amato; Sonia Goncalves; The Lighthouse Lab in Milton Keynes and Alex Alderton<br>Robert Koch Institute<br>COVID-19 Genomics UK (COG-UK)<br>A Alrezaihi; Alessandro Gerada; Alistair Darby; Angela Cowell; Anita Luca; Anu Chawla; Cassie Olateju; Catherine Hartley; Charlotte Nelson; |
|------------------------------------------------------|-------------------------------------------------------------------------------------|------------------------------------------------------------------------------------------------------------------------------------------------------------------------------------------------------------------------------------------------------------------------------------------------------------------------------------------------------------------------------------------------------------------------------------------------------------------------------------------------------------------------------------------------------------------------------------------------------------------------------------------------------------------------------------------------------------------------------------------------------------------------------------------------------------------------------------------------------------------------------------------------------------------------------------------------------------------------------------------------------------------------------------------------------------------------------------------------------------------------------------------------------------------------------------------------------------------------------------------------------------------------------------------------------------------------------------------------------------------------------------------------------------------------------------------------------------------------------------------------------------------------------------------------------------------------------------------------------------------------------------------------------------------------------------------------------------------------------------------------------------------------------------------------------------------------------------------------------------------------------------------------------------------------------------------------------------------------------------------------------------------------------------------------------------------------------------------------------------------------------------------------------------------------------------------------------------------------------------------------------------------------------------------------------------------------------------------------------------------------------------------------------------------------------------------------------------------------------------------------------------------------------------------------------------------------------------------------------------------------------------------------------------------------------------------------------------------------------------------------------------------------------------------------------------------------------------------------------------------------------------------------------------------------------------------------------------------------------------------------------------------------------------------------------------------------------------------------------------------------------------------------------------------------------------------------------------------------------------------------------------------------------------------------------------------------------------------------------------------------------------------------------------------------------------------------------------------------------------------------------------------------------------------------------------------------------------------------------------------------------------------------------------------------------------------------------------------------------------------------------------------------------------------------------------------------------------------------------------------------------------------------------------------------------------------------------------------------------------------------------------------------------------------------------------------------------------------------------------------------------------------------------------------------------------------------------------------------------------------------------------------------------------------------------------------------------------------------------------------------------------------------------------------------------------------------------------------------------------------------------------------------------------------------------------------------------------------------------------------------------------------------------------------------------------------------------------------------------------------------------------------------------------------------------------------------------------------------------------------------------------------------------------------------------------------------------------------------------------------------------------------------------------------------------------------------------------------------------------------------------------------------------------------------------------------------------------------------------------------------------------------------------------------------------------------------------------------------------------------------------------------------------------------------------------------------------------------------------------------------------------------------------------------------------------------------------------------------------------------------------------------------------------------------------------------------------------------------------------------------------------------------------------------------------------------------|--------------------------------------------------------------------------------------------------------------------------------------------------------------------------------------------------------------------------------------------------------------------------------------------------------------------------------------------------------------------------------------------------------------------------------------------------------------------------------------------------------------------------------------------------------------------------------------------------------------------------------------------------------------------------------------------------------------------------------------------------------------------------------------------------------------------------------------------------------------------------------------------------------------------------------------------------------------------------------------------------------------------------------------------------------------------------------------------------------------------------------------------------------------------------------------------------------------------------------------------------------------------------------------------------------------------------------------------------------------------------------------------------------------------------------------------------------------------------------------------------------------------------------------------------------------------------------------------------------------------------------------------------------------------------------------------------------------------------------------------------------------------------------------------------------------------------------------------------------------------------------------------------------------------------------------------------------------------------------------------------------------------------------------------------------------------------------------------------------------------------------------------------------------------------------------------------------------------------------------------------------------------------------------------------------------------------------------------------------------------------------------------------------------------------------------------------------------------------------------------------------------------------------------------------------------------------------------------------------------------------------------------------------------------------------------------------------------------------------------------------------------------------------------------------------------------------------------------------------------------------------------------------------------------------------------------------------------------------------------------------------------------------------------------------------------------------------------------------------------------------------------------------------------------------------------------------------------------------------------------------------------------------------------------------------------------------------------------------------------------------------------------------------------------------------------------------------------------------------------------------------------------------------------------------------------------------------------------------------------------------------------------------------------------------------------------------------------------------------------------------------------------------------------------------------------------------------------------------------------------------------------------------------------------------------------------------------------------------------------------------------------------------------------------------------------------------------------------------------------------------------------------------------------------------------------------------------------------------------------------------------------------------------------------------------------------------------------------------------------------------------------------------------------------------------------------------------------------------------------------------------------------------------------------------------------------------------------------------------------------------------------------------------------------------------------------------------------------------------------------------------------------------------------------------------------------------------------------------------------------------------------------------------------------------------------------------------------------------------------------------------------------------------------------------------------------------------------------------------------------------------------------------------------------------------------------------------------------------------------------------------------------------------------------------------------------------------------------------------------------------------------------------------------------------------------------------------------------------------------------------------------------------------------------------------------------------------------------------------------------------------------------------------------------------------------------------------------------------------------------------------------------------------------------------------------------------------------------------------------------------------------------------------------------------------------------------------------------------------------------------------------------------------------------------------------------------------------------------------------------------------------------------------------------------------------------------------------------------------------------------------------------------------------------------------------------------------------------------------------------------------------------------------------------------------------------------------------------------------------------------------------------------------------------------------------------------------------------------------------------------------------------------------------------------------------------------------------------------------------------------------------------------------|

|                                                                                                                                                                                                                                                                                                                                                                                                                                                                                                                                                                                                                                                                                                                                                                                                                                                                                                                                                                                                                                                                                                                                                                                                                                                                                         |                                                                                                                                                                                                                     |                                                                                                                                                                                                                                                      |                                                                                                                                                                                                                                                                                                                                                                                                                                                                                                                                         |
|-----------------------------------------------------------------------------------------------------------------------------------------------------------------------------------------------------------------------------------------------------------------------------------------------------------------------------------------------------------------------------------------------------------------------------------------------------------------------------------------------------------------------------------------------------------------------------------------------------------------------------------------------------------------------------------------------------------------------------------------------------------------------------------------------------------------------------------------------------------------------------------------------------------------------------------------------------------------------------------------------------------------------------------------------------------------------------------------------------------------------------------------------------------------------------------------------------------------------------------------------------------------------------------------|---------------------------------------------------------------------------------------------------------------------------------------------------------------------------------------------------------------------|------------------------------------------------------------------------------------------------------------------------------------------------------------------------------------------------------------------------------------------------------|-----------------------------------------------------------------------------------------------------------------------------------------------------------------------------------------------------------------------------------------------------------------------------------------------------------------------------------------------------------------------------------------------------------------------------------------------------------------------------------------------------------------------------------------|
|                                                                                                                                                                                                                                                                                                                                                                                                                                                                                                                                                                                                                                                                                                                                                                                                                                                                                                                                                                                                                                                                                                                                                                                                                                                                                         |                                                                                                                                                                                                                     | Consortium                                                                                                                                                                                                                                           | Ecaterina Vamos; Elaine O'Toole; Eleanor G Bentley; Ghada T Shawli; Isabel Garcia-Orval; James Johnson; James P Stewart; Jenifer Manson; Joanne Watts; Jones Benjamin; Jordan J Clark; Julian Hiscox; L Liu; Lucille Rainbow; M Almsaad; Margaret Hughes; Mark Whitehead; Matthew Gemmell; Miren Iturriza-Gomara; Muhannad Alruwaili; N.P Randle; Neil Swainston; PKF Gilmore; Parul Sharma; Rebekah Penrice-Randal; Richard Eccles; Richard Gregory; Sam Haldenby; Steve Paterson; Stuart D Armstrong; Trevor Ian Robinson; Ximeng Han |
| EPI_ISL_1846223                                                                                                                                                                                                                                                                                                                                                                                                                                                                                                                                                                                                                                                                                                                                                                                                                                                                                                                                                                                                                                                                                                                                                                                                                                                                         | MDI Limbach Berlin GmbH; MVZ Labor Berlin                                                                                                                                                                           | Robert Koch Institute                                                                                                                                                                                                                                |                                                                                                                                                                                                                                                                                                                                                                                                                                                                                                                                         |
| EPI_ISL_569098, EPI_ISL_569127, EPI_ISL_569181, EPI_ISL_569234, EPI_ISL_644422, EPI_ISL_644452, EPI_ISL_644470, EPI_ISL_2036729                                                                                                                                                                                                                                                                                                                                                                                                                                                                                                                                                                                                                                                                                                                                                                                                                                                                                                                                                                                                                                                                                                                                                         | MEPHI, Aix Marseille University                                                                                                                                                                                     | MEPHI, Aix Marseille University                                                                                                                                                                                                                      | Anthony LEVASSEUR                                                                                                                                                                                                                                                                                                                                                                                                                                                                                                                       |
| see above                                                                                                                                                                                                                                                                                                                                                                                                                                                                                                                                                                                                                                                                                                                                                                                                                                                                                                                                                                                                                                                                                                                                                                                                                                                                               | MVZ DIAMEDIS Diagnostische Medizin Sennestadt GmbH                                                                                                                                                                  | Bielefeld University                                                                                                                                                                                                                                 | Alexander Sczyrba; Christiane Scherer; David Brandt; Jörn Kalinowski; Levin-Joe Klages; Marina Simunovic; Markus Haak; Svenja Vinke; Tobias Busche                                                                                                                                                                                                                                                                                                                                                                                      |
| EPI_ISL_631295, EPI_ISL_631303                                                                                                                                                                                                                                                                                                                                                                                                                                                                                                                                                                                                                                                                                                                                                                                                                                                                                                                                                                                                                                                                                                                                                                                                                                                          |                                                                                                                                                                                                                     |                                                                                                                                                                                                                                                      |                                                                                                                                                                                                                                                                                                                                                                                                                                                                                                                                         |
| EPI_ISL_1141660                                                                                                                                                                                                                                                                                                                                                                                                                                                                                                                                                                                                                                                                                                                                                                                                                                                                                                                                                                                                                                                                                                                                                                                                                                                                         | MVZ Labor Dr. Limbach & Kollegen GbR                                                                                                                                                                                | Robert Koch Institute                                                                                                                                                                                                                                |                                                                                                                                                                                                                                                                                                                                                                                                                                                                                                                                         |
| EPI_ISL_860336, EPI_ISL_860355, EPI_ISL_860482, EPI_ISL_860512, EPI_ISL_2869769, EPI_ISL_2869783, EPI_ISL_2869787, EPI_ISL_2869806, EPI_ISL_2869824, EPI_ISL_2869865, EPI_ISL_2869873, EPI_ISL_2869909, EPI_ISL_2869911, EPI_ISL_2869953, EPI_ISL_2870014, EPI_ISL_2870082, EPI_ISL_2870085, EPI_ISL_2870121, EPI_ISL_2870134, EPI_ISL_2870169, EPI_ISL_2870177, EPI_ISL_2870184, EPI_ISL_2870192, EPI_ISL_2870344, EPI_ISL_2870441, EPI_ISL_2870489, EPI_ISL_2870929, EPI_ISL_2870946, EPI_ISL_2871001, EPI_ISL_2871011, EPI_ISL_2871074, EPI_ISL_2871289, EPI_ISL_2871399, EPI_ISL_2871435, EPI_ISL_2871615, EPI_ISL_2871659, EPI_ISL_2872003, EPI_ISL_2872008, EPI_ISL_2872014, EPI_ISL_2872015, EPI_ISL_2872055, EPI_ISL_2872095, EPI_ISL_2872236, EPI_ISL_2872237, EPI_ISL_2872248, EPI_ISL_2872259, EPI_ISL_2872260, EPI_ISL_2872265, EPI_ISL_2872269, EPI_ISL_2872279, EPI_ISL_2872298, EPI_ISL_2872303, EPI_ISL_2872309, EPI_ISL_2872321, EPI_ISL_2872326, EPI_ISL_2872335, EPI_ISL_2872355, EPI_ISL_2872356, EPI_ISL_2872375, EPI_ISL_2872378, EPI_ISL_2872395, EPI_ISL_2872398, EPI_ISL_2872400, EPI_ISL_2872407, EPI_ISL_2872408                                                                                                                                             | Center of Medical Microbiology, Virology, and Hospital Hygiene, University of Duesseldorf                                                                                                                           | Alexander Dilthey; Andreas Walker; André Heimbach; Bärbel Lippke; Carsten Tiemann; Dennis Deschka; Janine Silvery; Julia Fazaal; Jörg Timm; Kerstin Ludwig; Klaus Pfeffer; Malte Kohns Vasconcelos; Per Hoffmann; Tobias Wienemann; Torsten Houwaart |                                                                                                                                                                                                                                                                                                                                                                                                                                                                                                                                         |
| see above                                                                                                                                                                                                                                                                                                                                                                                                                                                                                                                                                                                                                                                                                                                                                                                                                                                                                                                                                                                                                                                                                                                                                                                                                                                                               | MVZ Labor Krone GbR                                                                                                                                                                                                 | Robert Koch Institute                                                                                                                                                                                                                                |                                                                                                                                                                                                                                                                                                                                                                                                                                                                                                                                         |
| EPI_ISL_1217731                                                                                                                                                                                                                                                                                                                                                                                                                                                                                                                                                                                                                                                                                                                                                                                                                                                                                                                                                                                                                                                                                                                                                                                                                                                                         | MVZ Labor Krone GbR                                                                                                                                                                                                 | Robert Koch Institute                                                                                                                                                                                                                                |                                                                                                                                                                                                                                                                                                                                                                                                                                                                                                                                         |
| EPI_ISL_640220, EPI_ISL_640225, EPI_ISL_640227, EPI_ISL_640231, EPI_ISL_640235, EPI_ISL_640236, EPI_ISL_640245, EPI_ISL_640247, EPI_ISL_640251, EPI_ISL_640260, EPI_ISL_640261, EPI_ISL_640262, EPI_ISL_640265, EPI_ISL_640267, EPI_ISL_640271                                                                                                                                                                                                                                                                                                                                                                                                                                                                                                                                                                                                                                                                                                                                                                                                                                                                                                                                                                                                                                          | MVZ Laborärzte Singen                                                                                                                                                                                               | MVZ Laborärzte Singen                                                                                                                                                                                                                                | Folker Wenzel; Frithjof Blessing; Jonas Schmidt; Sandro Berghaus                                                                                                                                                                                                                                                                                                                                                                                                                                                                        |
| see above                                                                                                                                                                                                                                                                                                                                                                                                                                                                                                                                                                                                                                                                                                                                                                                                                                                                                                                                                                                                                                                                                                                                                                                                                                                                               | Max von Pettenkofer Institute, Virology, National Reference Center for Retroviruses, LMU Munich                                                                                                                     | Laboratory for Functional Genome Analysis, Dept. Genomics, Gene Center of the LMU Munich                                                                                                                                                             | Alexander Graf; Ashok Varadharajan; Helmut Blum; Max Muenchhoff; Oliver Keppler; Stefan Krebs                                                                                                                                                                                                                                                                                                                                                                                                                                           |
| EPI_ISL_420898, EPI_ISL_420902, EPI_ISL_420904, EPI_ISL_420909                                                                                                                                                                                                                                                                                                                                                                                                                                                                                                                                                                                                                                                                                                                                                                                                                                                                                                                                                                                                                                                                                                                                                                                                                          |                                                                                                                                                                                                                     |                                                                                                                                                                                                                                                      |                                                                                                                                                                                                                                                                                                                                                                                                                                                                                                                                         |
| EPI_ISL_1751109, EPI_ISL_1751112, EPI_ISL_1751364, EPI_ISL_1751386, EPI_ISL_1751473, EPI_ISL_1751483, EPI_ISL_1751560, EPI_ISL_1751604, EPI_ISL_1751612, EPI_ISL_1751614, EPI_ISL_1751688, EPI_ISL_1751718, EPI_ISL_1751727, EPI_ISL_1751775, EPI_ISL_1751994, EPI_ISL_1752020, EPI_ISL_1752023, EPI_ISL_1752134, EPI_ISL_1752258, EPI_ISL_2094537, EPI_ISL_2094687, EPI_ISL_2094751, EPI_ISL_2094788, EPI_ISL_2095042, EPI_ISL_2095043, EPI_ISL_2095191, EPI_ISL_2095192, EPI_ISL_2095194, EPI_ISL_2095195, EPI_ISL_2095196, EPI_ISL_2095197, EPI_ISL_2095199, EPI_ISL_2095200, EPI_ISL_2095201, EPI_ISL_2095202, EPI_ISL_2095203, EPI_ISL_2095204, EPI_ISL_2095205, EPI_ISL_2095206, EPI_ISL_2095207, EPI_ISL_2095209, EPI_ISL_2095212, EPI_ISL_2095213, EPI_ISL_2095214, EPI_ISL_2095215, EPI_ISL_2095216, EPI_ISL_2095217, EPI_ISL_2095219, EPI_ISL_2095220, EPI_ISL_2095221, EPI_ISL_2095222, EPI_ISL_2095224, EPI_ISL_2095225, EPI_ISL_2095226, EPI_ISL_2095227, EPI_ISL_2095228, EPI_ISL_2095233, EPI_ISL_2095237, EPI_ISL_2095239, EPI_ISL_2095240, EPI_ISL_2095241, EPI_ISL_2095243, EPI_ISL_2095244, EPI_ISL_2095245, EPI_ISL_2095246, EPI_ISL_2095247, EPI_ISL_2095248, EPI_ISL_2095250, EPI_ISL_2095251, EPI_ISL_2095252, EPI_ISL_2095255, EPI_ISL_2095302, EPI_ISL_2450309 | Laboratory for Functional Genome Analysis; Dept. Genomics; Gene Center of the LMU Munich                                                                                                                            | Alexander Graf; Helmut Blum; Max Muenchhoff; Oliver Keppler; Stefan Krebs                                                                                                                                                                            |                                                                                                                                                                                                                                                                                                                                                                                                                                                                                                                                         |
| see above                                                                                                                                                                                                                                                                                                                                                                                                                                                                                                                                                                                                                                                                                                                                                                                                                                                                                                                                                                                                                                                                                                                                                                                                                                                                               | Max von Pettenkofer Institute, Virology, National Reference Center for Retroviruses, LMU Munich                                                                                                                     | Laboratory for Functional Genome Analysis; Dept. Genomics; Gene Center of the LMU Munich                                                                                                                                                             | Alexander Graf; Helmut Blum; Max Muenchhoff; Oliver Keppler; Stefan Krebs                                                                                                                                                                                                                                                                                                                                                                                                                                                               |
| EPI_ISL_437204, EPI_ISL_437233, EPI_ISL_437238, EPI_ISL_437240, EPI_ISL_437243, EPI_ISL_437276, EPI_ISL_437279, EPI_ISL_437359, EPI_ISL_451937, EPI_ISL_451938, EPI_ISL_451941, EPI_ISL_451944, EPI_ISL_466888, EPI_ISL_466889, EPI_ISL_466892, EPI_ISL_466901, EPI_ISL_466905, EPI_ISL_466906, EPI_ISL_466908, EPI_ISL_466909, EPI_ISL_466910, EPI_ISL_466912, EPI_ISL_466917, EPI_ISL_466918, EPI_ISL_466920, EPI_ISL_466922, EPI_ISL_466923, EPI_ISL_466924, EPI_ISL_548957, EPI_ISL_852564, EPI_ISL_852569, EPI_ISL_852574, EPI_ISL_852575, EPI_ISL_852576, EPI_ISL_852580, EPI_ISL_852581, EPI_ISL_852582, EPI_ISL_852584, EPI_ISL_852586, EPI_ISL_852588, EPI_ISL_852589, EPI_ISL_852590, EPI_ISL_852591, EPI_ISL_852592, EPI_ISL_852600                                                                                                                                                                                                                                                                                                                                                                                                                                                                                                                                          | Laboratory for Functional Genome Analysis, Dept. Genomics, Gene Center of the LMU Munich                                                                                                                            | Alexander Graf; Helmut Blum; Max Muenchhoff; Oliver Keppler; Stefan Krebs                                                                                                                                                                            |                                                                                                                                                                                                                                                                                                                                                                                                                                                                                                                                         |
| see above                                                                                                                                                                                                                                                                                                                                                                                                                                                                                                                                                                                                                                                                                                                                                                                                                                                                                                                                                                                                                                                                                                                                                                                                                                                                               | Max von Pettenkofer Institute, Virology, National Reference Center for Retroviruses, LMU München                                                                                                                    | Center of Medical Microbiology, Virology, and Hospital Hygiene, University of Duesseldorf                                                                                                                                                            | Alexander Dilthey; Andreas Walker; Angelika Helmer; Christian Lange; Daniel Strelow; Jessica Nicolai; Jörg Timm; Klaus Pfeffer; Lisanna Hülse; Malte Kohns Vasconcelos; Maximilian Damagnez; Nadine Lübke; Tobias Wienemann; Torsten Houwaart                                                                                                                                                                                                                                                                                           |
| EPI_ISL_1347202, EPI_ISL_1347400, EPI_ISL_1347433, EPI_ISL_1990651                                                                                                                                                                                                                                                                                                                                                                                                                                                                                                                                                                                                                                                                                                                                                                                                                                                                                                                                                                                                                                                                                                                                                                                                                      | Medical Laboratories Duesseldorf                                                                                                                                                                                    | Center of Medical Microbiology, Virology, and Hospital Hygiene, University of Duesseldorf                                                                                                                                                            |                                                                                                                                                                                                                                                                                                                                                                                                                                                                                                                                         |
| EPI_ISL_549081                                                                                                                                                                                                                                                                                                                                                                                                                                                                                                                                                                                                                                                                                                                                                                                                                                                                                                                                                                                                                                                                                                                                                                                                                                                                          | Medical Microbiology Unit, Department for Laboratory Medicine, Drammen Hospital, Vestre Viken Health Trust,                                                                                                         | Norwegian Institute of Public Health, Department of Virology                                                                                                                                                                                         | Hilde Elshaug; Hilde Synnøve Vollan; Kamilla Heddeland Instefjord; Karoline Bragstad; Kathrine Stene-Johansen; Olav Hungnes; Rasmus Riis Kopperud                                                                                                                                                                                                                                                                                                                                                                                       |
| EPI_ISL_581453, EPI_ISL_581454, EPI_ISL_581457, EPI_ISL_581459, EPI_ISL_581465, EPI_ISL_581483                                                                                                                                                                                                                                                                                                                                                                                                                                                                                                                                                                                                                                                                                                                                                                                                                                                                                                                                                                                                                                                                                                                                                                                          | Medizinische Klinik Innere Medizin I, Universitätsklinikum Tübingen                                                                                                                                                 | NGS Competence Center Tübingen, Institut für Medizinische Mikrobiologie und Hygiene, Universitätsklinikum Tübingen                                                                                                                                   | Angel Angelov                                                                                                                                                                                                                                                                                                                                                                                                                                                                                                                           |
| EPI_ISL_1280885, EPI_ISL_1892868                                                                                                                                                                                                                                                                                                                                                                                                                                                                                                                                                                                                                                                                                                                                                                                                                                                                                                                                                                                                                                                                                                                                                                                                                                                        | Medizinisches Zentrallabor Altenburg GmbH & Co.KG                                                                                                                                                                   | Robert Koch Institute                                                                                                                                                                                                                                |                                                                                                                                                                                                                                                                                                                                                                                                                                                                                                                                         |
|                                                                                                                                                                                                                                                                                                                                                                                                                                                                                                                                                                                                                                                                                                                                                                                                                                                                                                                                                                                                                                                                                                                                                                                                                                                                                         | Microbiologia CATLAB                                                                                                                                                                                                | Can Rutí SARS-CoV-2 Sequencing Hub (HUGTIP/IrSiCaixa/GTP)                                                                                                                                                                                            | Alba Sánchez; Anna Nob; Antoni E Bordoy; Bonaventura Clotet; Cristina Casañ; Cristina Esteban; Francesc Catala-Moll; Gemma Clara; Ignacio Blanco; Marc Noguera-Julian; Maria Casadellà; Mariona Parera; Mercedes Guerrero; Montserrat Giménez; Pere-Joan Cardona; Pilar Armengol; Roger Paredes; Verónica Saludes; and Elisa Martró on behalf of the Can Rutí SARS-CoV-2 Sequencing Hub.                                                                                                                                                |
| EPI_ISL_2140529, EPI_ISL_2281285, EPI_ISL_2281297, EPI_ISL_2281313                                                                                                                                                                                                                                                                                                                                                                                                                                                                                                                                                                                                                                                                                                                                                                                                                                                                                                                                                                                                                                                                                                                                                                                                                      | Microbiology Department, Laboratori Clínic Metropolitana Nord. Hospital Universitari Germans Trias i Pujol                                                                                                          | Can Rutí SARS-CoV-2 Sequencing Hub (HUGTIP/IrSiCaixa/GTP)                                                                                                                                                                                            | Alba Sánchez; Anna Nob; Antoni E Bordoy; Bonaventura Clotet; Cristina Casañ; Cristina Esteban; Francesc Catala-Moll; Gemma Clara; Ignacio Blanco; Marc Noguera-Julian; Maria Casadellà; Mariona Parera; Mercedes Guerrero; Montserrat Giménez; Pere-Joan Cardona; Pilar Armengol; Roger Paredes; Verónica Saludes; and Elisa Martró on behalf of the Can Rutí SARS-CoV-2 Sequencing Hub.                                                                                                                                                |
| EPI_ISL_1208415, EPI_ISL_1208651, EPI_ISL_1263405, EPI_ISL_2035872                                                                                                                                                                                                                                                                                                                                                                                                                                                                                                                                                                                                                                                                                                                                                                                                                                                                                                                                                                                                                                                                                                                                                                                                                      | Microbiology Department, Laboratori Clínic Metropolitana Nord. Hospital Universitari Germans Trias i Pujol.                                                                                                         | Can Rutí SARS-CoV-2 Sequencing Hub (HUGTIP/IrSiCaixa/GTP)                                                                                                                                                                                            | Alba Sánchez; Anna Not; Antoni E Bordoy; Bonaventura Clotet; Carol Galvez Maria Casadellà; Cristina Casañ; Cristina Esteban; Francesc Catala-Moll; Gemma Clara; Ignacio Blanco; Irina Pey; Jordi Barretina; Jose Francisco Sánchez; Julia G Prado; Lauro Sumoy; Marc Noguera-Julian; Maria Casadellà; Mariona Parera; Mercedes Guerrero; Montserrat Giménez; Pere-Joan Cardona; Pilar Armengol; Roger Paredes; Verónica Saludes; and Elisa Martró on behalf of the Can Rutí SARS-CoV-2 Sequencing Hub.                                  |
| EPI_ISL_1502200                                                                                                                                                                                                                                                                                                                                                                                                                                                                                                                                                                                                                                                                                                                                                                                                                                                                                                                                                                                                                                                                                                                                                                                                                                                                         | Microbiology Department, University Hospital Donostia                                                                                                                                                               | Microbiology Department, University Hospital Donostia                                                                                                                                                                                                | Cilla G.; Gomez M; Marimon JM; Montes M; Piñeiro L; Sorraain A                                                                                                                                                                                                                                                                                                                                                                                                                                                                          |
| EPI_ISL_2365883                                                                                                                                                                                                                                                                                                                                                                                                                                                                                                                                                                                                                                                                                                                                                                                                                                                                                                                                                                                                                                                                                                                                                                                                                                                                         | Microbiology Department. Complejo Hospitalario Universitario de Vigo                                                                                                                                                | Microbiology Department. Complejo Hospitalario Universitario de Vigo                                                                                                                                                                                 | Alfaya N; Alonso I; Alvarez M; Cabrera JJ; Carballo R; Cores O; Cortizo S; Martinez L; Mediero G; Perez S; Potel C; Regueiro B; Rey S; Vasallo FJ; del-Campo V                                                                                                                                                                                                                                                                                                                                                                          |
| EPI_ISL_1857293                                                                                                                                                                                                                                                                                                                                                                                                                                                                                                                                                                                                                                                                                                                                                                                                                                                                                                                                                                                                                                                                                                                                                                                                                                                                         | Microbiology and Virology Laboratory, "Policlinico Riuniti, Azienda Ospedaliero Universitaria, Foggia"                                                                                                              | Microbiology and Virology Laboratory, "Policlinico Riuniti, Azienda Ospedaliero Universitaria, Foggia"                                                                                                                                               | Annamaria D'Aprile; Daniela Pisanelli; Donatella Cedola; Fabio Arena; Loris Micelli; Maria Pia Patrizio; Maria Rosaria Lipsi; Maurizio Margaglione and Rosella De Nittis.; Settimia Altamura; Tiziana Rollo; Valeria Delli Carri                                                                                                                                                                                                                                                                                                        |
| EPI_ISL_1170007                                                                                                                                                                                                                                                                                                                                                                                                                                                                                                                                                                                                                                                                                                                                                                                                                                                                                                                                                                                                                                                                                                                                                                                                                                                                         | Ministry of Health Turkey                                                                                                                                                                                           | Ministry of Health Turkey                                                                                                                                                                                                                            | Fatma Bayrakdar; Gulay Korukluoglu; Suleyman Yalcin; Yasemin Cosgun                                                                                                                                                                                                                                                                                                                                                                                                                                                                     |
| EPI_ISL_1858183, EPI_ISL_1860284, EPI_ISL_1862694, EPI_ISL_1863277, EPI_ISL_1868497, EPI_ISL_1870110, EPI_ISL_1871547, EPI_ISL_1872060, EPI_ISL_1873737, EPI_ISL_1875732, EPI_ISL_1876034, EPI_ISL_1876076, EPI_ISL_1878732, EPI_ISL_1879658, EPI_ISL_1880072, EPI_ISL_1880777, EPI_ISL_1880888, EPI_ISL_1881529, EPI_ISL_1881789, EPI_ISL_1884419, EPI_ISL_1887140, EPI_ISL_1888338, EPI_ISL_1889887, EPI_ISL_1890438, EPI_ISL_1890465, EPI_ISL_1890491, EPI_ISL_1891180, EPI_ISL_1891989, EPI_ISL_1893228, EPI_ISL_1893868, EPI_ISL_1894110, EPI_ISL_1895961, EPI_ISL_1896619                                                                                                                                                                                                                                                                                                                                                                                                                                                                                                                                                                                                                                                                                                         |                                                                                                                                                                                                                     |                                                                                                                                                                                                                                                      |                                                                                                                                                                                                                                                                                                                                                                                                                                                                                                                                         |
| see above                                                                                                                                                                                                                                                                                                                                                                                                                                                                                                                                                                                                                                                                                                                                                                                                                                                                                                                                                                                                                                                                                                                                                                                                                                                                               | Molekylær Medicinsk Afdeling, Aarhus University Hospital, Aarhus, Denmark                                                                                                                                           | Aalborg University                                                                                                                                                                                                                                   | Danish Covid-19 Genome Consortium                                                                                                                                                                                                                                                                                                                                                                                                                                                                                                       |
| EPI_ISL_2429333                                                                                                                                                                                                                                                                                                                                                                                                                                                                                                                                                                                                                                                                                                                                                                                                                                                                                                                                                                                                                                                                                                                                                                                                                                                                         | Molekylær Medicinsk Afdeling, Aarhus University Hospital, Aarhus, Denmark                                                                                                                                           | Statens Serum Institut Bioinformatics and Microbial Genomics                                                                                                                                                                                         | Danish Covid-19 Genome Consortium                                                                                                                                                                                                                                                                                                                                                                                                                                                                                                       |
| EPI_ISL_490205, EPI_ISL_490208                                                                                                                                                                                                                                                                                                                                                                                                                                                                                                                                                                                                                                                                                                                                                                                                                                                                                                                                                                                                                                                                                                                                                                                                                                                          | München Klinik Schwabing                                                                                                                                                                                            | MGZ Medical Genetics Center                                                                                                                                                                                                                          | Dieter A. Wolf; Elke Holinski-Feder                                                                                                                                                                                                                                                                                                                                                                                                                                                                                                     |
| EPI_ISL_1623650, EPI_ISL_1623652                                                                                                                                                                                                                                                                                                                                                                                                                                                                                                                                                                                                                                                                                                                                                                                                                                                                                                                                                                                                                                                                                                                                                                                                                                                        | NOVABIO DORDOGNE                                                                                                                                                                                                    |                                                                                                                                                                                                                                                      |                                                                                                                                                                                                                                                                                                                                                                                                                                                                                                                                         |
| EPI_ISL_416036                                                                                                                                                                                                                                                                                                                                                                                                                                                                                                                                                                                                                                                                                                                                                                                                                                                                                                                                                                                                                                                                                                                                                                                                                                                                          | National Influenza Center - Instituto Adolfo Lutz                                                                                                                                                                   | CMR Virus des Infections Respiratoires - France SUD                                                                                                                                                                                                  | Antonin Bal; Bruno Lina; Gregory Destras; Gwendolynne Burfin; Hadrien Regue; Laurence Jossot; Martine Valette; Quentin Semanas                                                                                                                                                                                                                                                                                                                                                                                                          |
| EPI_ISL_402125                                                                                                                                                                                                                                                                                                                                                                                                                                                                                                                                                                                                                                                                                                                                                                                                                                                                                                                                                                                                                                                                                                                                                                                                                                                                          | National Institute for Communicable Disease Control and Prevention (ICDC) Chinese Center for Disease Control and Prevention (China CDC)                                                                             | Instituto Adolfo Lutz, Interdisciplinary Procedures Center, Strategic Laboratory                                                                                                                                                                     | Adriana Bugno; Adriano Abbud; Carlos Henrique Camargo; Claudia Regina Gonçalves; Claudio Tavares Sacchi; Daniela Bernardes Borges da Silva; Erica Valessa Ramos Gomes; Fabiana Cristina Pereira dos Santos; Maria do Carmo Sampaio Tavares Timenetsky; Simone Guadagnucci Morillo; Terezinha Maria de Paiva                                                                                                                                                                                                                             |
|                                                                                                                                                                                                                                                                                                                                                                                                                                                                                                                                                                                                                                                                                                                                                                                                                                                                                                                                                                                                                                                                                                                                                                                                                                                                                         |                                                                                                                                                                                                                     | National Institute for Communicable Disease Control and Prevention (ICDC) Chinese Center for Disease Control and Prevention (China CDC)                                                                                                              | Chen; Dai; F.-H.; Hu, Y.; J.-H.; J.-J.; J.-L. and Zhu; Liu, Y.; Pei; Q.-M.; She; Song; T.-Y.; Tao; Tian; Wang; Wang, W.; Wu, F.; Xu, L.; Y.-L.; Y.-M.; Y.-Y.; Y.-Z.; Yu, B.; Z.-G.; Z.-W.; Zhang; Zhao, S.; Zheng                                                                                                                                                                                                                                                                                                                       |
| EPI_ISL_408484                                                                                                                                                                                                                                                                                                                                                                                                                                                                                                                                                                                                                                                                                                                                                                                                                                                                                                                                                                                                                                                                                                                                                                                                                                                                          | National Institute for Viral Disease Control and Prevention, China CDC                                                                                                                                              | National Institute for Viral Disease Control & Prevention, CCDC                                                                                                                                                                                      | Baoying Huang; Fei Ye; George F. Gao; Guizhen Wu; Huiping Yang; Jianan Xu; Li Zhao; Peihua Niu; Roujian Lu; Wenbo Xu; Wenjie Tan; Wenling Wang; Xiang Zhao                                                                                                                                                                                                                                                                                                                                                                              |
| EPI_ISL_2259635                                                                                                                                                                                                                                                                                                                                                                                                                                                                                                                                                                                                                                                                                                                                                                                                                                                                                                                                                                                                                                                                                                                                                                                                                                                                         | Niedersächsisches Landesgesundheitsamt (NLGA)                                                                                                                                                                       | Robert Koch Institute                                                                                                                                                                                                                                |                                                                                                                                                                                                                                                                                                                                                                                                                                                                                                                                         |
| EPI_ISL_775281, EPI_ISL_775282, EPI_ISL_775283, EPI_ISL_775289, EPI_ISL_775295, EPI_ISL_775296, EPI_ISL_775297, EPI_ISL_775301, EPI_ISL_775302, EPI_ISL_775375, EPI_ISL_2333081, EPI_ISL_2333496, EPI_ISL_2333540                                                                                                                                                                                                                                                                                                                                                                                                                                                                                                                                                                                                                                                                                                                                                                                                                                                                                                                                                                                                                                                                       | Nordland Hospital - Bodo, Laboratory Department, Molecular Biology Unit                                                                                                                                             | Norwegian Institute of Public Health, Department of Virology                                                                                                                                                                                         | *Kathrine Stene-Johansen; Atiya R Ali; Debech Nadia; Engebretsen Serina Beate; Garcia Llorente Ignacio; Hilde Elshaug; Hilde Vollan; Jon Bråte; Kamilla Heddeland Instefjord; Karoline Bragstad; Kathrine Stene-Johansen; Line Victoria Moen; Marie Paulsen Madsen; Olav Hungnes; Pedersen Benedikte Nevjen; Rasmus Riis Kopperud                                                                                                                                                                                                       |
| see above                                                                                                                                                                                                                                                                                                                                                                                                                                                                                                                                                                                                                                                                                                                                                                                                                                                                                                                                                                                                                                                                                                                                                                                                                                                                               | Nordland Hospital - Bodo, Laboratory Department, Molecular Biology Unit                                                                                                                                             |                                                                                                                                                                                                                                                      |                                                                                                                                                                                                                                                                                                                                                                                                                                                                                                                                         |
| EPI_ISL_573394, EPI_ISL_577035, EPI_ISL_584694, EPI_ISL_584702, EPI_ISL_594989, EPI_ISL_594998, EPI_ISL_595043, EPI_ISL_612527, EPI_ISL_724940, EPI_ISL_725009, EPI_ISL_741447                                                                                                                                                                                                                                                                                                                                                                                                                                                                                                                                                                                                                                                                                                                                                                                                                                                                                                                                                                                                                                                                                                          |                                                                                                                                                                                                                     |                                                                                                                                                                                                                                                      |                                                                                                                                                                                                                                                                                                                                                                                                                                                                                                                                         |
| see above                                                                                                                                                                                                                                                                                                                                                                                                                                                                                                                                                                                                                                                                                                                                                                                                                                                                                                                                                                                                                                                                                                                                                                                                                                                                               | Northumbria University / South Tees Hospitals NHS Foundation Trust / North Cumbria Integrated Care NHS Foundation Trust / North Tees and Hartlepool NHS Foundation Trust / Newcastle Hospitals NHS Foundation Trust | COVID-19 Genomics UK (COG-UK) Consortium                                                                                                                                                                                                             | Andrew Nelson; Brendan Payne; Clive Graham; Darren L Smith; Debra Padgett; Edward Barton; Emma Swindells; Garren Scott; Gary Black; Gary Eltringham; Giles S Holt; Greg R Young; Jane Greenaway; Jennifer Collins; John Allan; Joshua Loh; Lynn Dover; Matthew Bashton;                                                                                                                                                                                                                                                                 |

|                                                                                                                                                                                                                                                                                                                                                                                                                                                                                                                                                 |                                                                                                                                                                                                                                                                                                                                                                                                                                                                                                                                                                                                                                                                                                                  |                                                                                          |
|-------------------------------------------------------------------------------------------------------------------------------------------------------------------------------------------------------------------------------------------------------------------------------------------------------------------------------------------------------------------------------------------------------------------------------------------------------------------------------------------------------------------------------------------------|------------------------------------------------------------------------------------------------------------------------------------------------------------------------------------------------------------------------------------------------------------------------------------------------------------------------------------------------------------------------------------------------------------------------------------------------------------------------------------------------------------------------------------------------------------------------------------------------------------------------------------------------------------------------------------------------------------------|------------------------------------------------------------------------------------------|
| EPI_ISL_840382, EPI_ISL_840595, EPI_ISL_841343, EPI_ISL_867338, EPI_ISL_867844, EPI_ISL_951561, EPI_ISL_952084, EPI_ISL_952086, EPI_ISL_952173, EPI_ISL_952302, EPI_ISL_999622, EPI_ISL_999891, EPI_ISL_1052526, EPI_ISL_1052528, EPI_ISL_1052751, EPI_ISL_1053036, EPI_ISL_1053149, EPI_ISL_1053180, EPI_ISL_1053294, EPI_ISL_1106372, EPI_ISL_1106376, EPI_ISL_1107443, EPI_ISL_1179574                                                                                                                                                       | Mohammad A Tariq; Paul Baker; Sarah Essex; Steve Liggett; Wen C Yew; Yusrì Taha                                                                                                                                                                                                                                                                                                                                                                                                                                                                                                                                                                                                                                  |                                                                                          |
|                                                                                                                                                                                                                                                                                                                                                                                                                                                                                                                                                 | see above                                                                                                                                                                                                                                                                                                                                                                                                                                                                                                                                                                                                                                                                                                        | Originating lab: Wales Specialist Virology Centre Sequencing lab: Pathogen Genomics Unit |
| EPI_ISL_2425845, EPI_ISL_2425847                                                                                                                                                                                                                                                                                                                                                                                                                                                                                                                | Oslo University Hospital, Department of Medical Microbiology                                                                                                                                                                                                                                                                                                                                                                                                                                                                                                                                                                                                                                                     |                                                                                          |
| EPI_ISL_1260869                                                                                                                                                                                                                                                                                                                                                                                                                                                                                                                                 | Ospedale Mater Salutis                                                                                                                                                                                                                                                                                                                                                                                                                                                                                                                                                                                                                                                                                           |                                                                                          |
| EPI_ISL_833325                                                                                                                                                                                                                                                                                                                                                                                                                                                                                                                                  | Ospedale SS Annunziata Chieti                                                                                                                                                                                                                                                                                                                                                                                                                                                                                                                                                                                                                                                                                    |                                                                                          |
| EPI_ISL_549043, EPI_ISL_549044, EPI_ISL_549045, EPI_ISL_549046, EPI_ISL_549047, EPI_ISL_549126, EPI_ISL_549127, EPI_ISL_549130, EPI_ISL_549131, EPI_ISL_549134, EPI_ISL_549136, EPI_ISL_549137, EPI_ISL_549139, EPI_ISL_549140, EPI_ISL_549141, EPI_ISL_549142, EPI_ISL_549145, EPI_ISL_549146, EPI_ISL_549147, EPI_ISL_549148, EPI_ISL_549149, EPI_ISL_549150, EPI_ISL_549151, EPI_ISL_549152, EPI_ISL_549153, EPI_ISL_549155, EPI_ISL_549156, EPI_ISL_549157, EPI_ISL_549158, EPI_ISL_549159, EPI_ISL_549163, EPI_ISL_590922, EPI_ISL_2333080 | Norwegian Institute of Public Health, Department of Virology                                                                                                                                                                                                                                                                                                                                                                                                                                                                                                                                                                                                                                                     |                                                                                          |
| see above                                                                                                                                                                                                                                                                                                                                                                                                                                                                                                                                       | Ostfold Hospital Trust - Kalnes, Centre for Laboratory Medicine, Section for gene technology and infection serology                                                                                                                                                                                                                                                                                                                                                                                                                                                                                                                                                                                              |                                                                                          |
| EPI_ISL_549534, EPI_ISL_559841, EPI_ISL_627257, EPI_ISL_741030, EPI_ISL_1309734, EPI_ISL_2367313                                                                                                                                                                                                                                                                                                                                                                                                                                                | Oxford Viromics, NDM, University of Oxford; Oxford University Hospitals; Basingstoke and North Hampshire Hospital                                                                                                                                                                                                                                                                                                                                                                                                                                                                                                                                                                                                |                                                                                          |
| EPI_ISL_2035944, EPI_ISL_2035948, EPI_ISL_853923                                                                                                                                                                                                                                                                                                                                                                                                                                                                                                | PSVJ                                                                                                                                                                                                                                                                                                                                                                                                                                                                                                                                                                                                                                                                                                             |                                                                                          |
| EPI_ISL_2155260                                                                                                                                                                                                                                                                                                                                                                                                                                                                                                                                 | Pasteur Institute - Laboratory of Clinical Virology                                                                                                                                                                                                                                                                                                                                                                                                                                                                                                                                                                                                                                                              |                                                                                          |
| EPI_ISL_582134, EPI_ISL_1092037, EPI_ISL_1092052, EPI_ISL_1092055, EPI_ISL_1092064, EPI_ISL_1092074, EPI_ISL_1092078, EPI_ISL_1092081, EPI_ISL_1092100, EPI_ISL_1092246, EPI_ISL_1092273, EPI_ISL_1092275, EPI_ISL_1092306, EPI_ISL_1092316, EPI_ISL_1092318                                                                                                                                                                                                                                                                                    | Pharmgenetix GmbH                                                                                                                                                                                                                                                                                                                                                                                                                                                                                                                                                                                                                                                                                                |                                                                                          |
| see above                                                                                                                                                                                                                                                                                                                                                                                                                                                                                                                                       | Philippine Red Cross - Port Area                                                                                                                                                                                                                                                                                                                                                                                                                                                                                                                                                                                                                                                                                 |                                                                                          |
| EPI_ISL_887168, EPI_ISL_887170, EPI_ISL_887175, EPI_ISL_887176, EPI_ISL_887185, EPI_ISL_887187, EPI_ISL_887189, EPI_ISL_887200, EPI_ISL_887202, EPI_ISL_887205, EPI_ISL_887209, EPI_ISL_887217, EPI_ISL_887224, EPI_ISL_887226, EPI_ISL_887231, EPI_ISL_887235, EPI_ISL_887327, EPI_ISL_887347, EPI_ISL_887353, EPI_ISL_887370, EPI_ISL_887372, EPI_ISL_887390, EPI_ISL_887391, EPI_ISL_887398, EPI_ISL_887402, EPI_ISL_887405, EPI_ISL_887408, EPI_ISL_887409                                                                                  | Protzer Lab                                                                                                                                                                                                                                                                                                                                                                                                                                                                                                                                                                                                                                                                                                      |                                                                                          |
| see above                                                                                                                                                                                                                                                                                                                                                                                                                                                                                                                                       | Protzer Lab                                                                                                                                                                                                                                                                                                                                                                                                                                                                                                                                                                                                                                                                                                      |                                                                                          |
| EPI_ISL_1373179, EPI_ISL_1373185, EPI_ISL_1373186, EPI_ISL_1373256, EPI_ISL_1373271, EPI_ISL_1373282, EPI_ISL_1373284, EPI_ISL_1373303, EPI_ISL_1373306, EPI_ISL_1373312, EPI_ISL_1373313                                                                                                                                                                                                                                                                                                                                                       | Protzer Lab, Laboratory for Functional Genome Analysis, Dept. Genomics, Gene Center of the LMU Munich                                                                                                                                                                                                                                                                                                                                                                                                                                                                                                                                                                                                            |                                                                                          |
| see above                                                                                                                                                                                                                                                                                                                                                                                                                                                                                                                                       | Protzer Lab, Gagneur Lab, Robert Koch Institut                                                                                                                                                                                                                                                                                                                                                                                                                                                                                                                                                                                                                                                                   |                                                                                          |
| EPI_ISL_2379828, EPI_ISL_2380126, EPI_ISL_596164, EPI_ISL_664747                                                                                                                                                                                                                                                                                                                                                                                                                                                                                | Public Health Authority of the Slovak Republic                                                                                                                                                                                                                                                                                                                                                                                                                                                                                                                                                                                                                                                                   |                                                                                          |
| EPI_ISL_594968, EPI_ISL_613321                                                                                                                                                                                                                                                                                                                                                                                                                                                                                                                  | Quadram Institute Bioscience                                                                                                                                                                                                                                                                                                                                                                                                                                                                                                                                                                                                                                                                                     |                                                                                          |
| EPI_ISL_1201590                                                                                                                                                                                                                                                                                                                                                                                                                                                                                                                                 | Queens Medical Centre, Clinical Microbiology Department / DeepSeq Nottingham                                                                                                                                                                                                                                                                                                                                                                                                                                                                                                                                                                                                                                     |                                                                                          |
| EPI_ISL_637171, EPI_ISL_686548, EPI_ISL_2108816, EPI_ISL_2521388                                                                                                                                                                                                                                                                                                                                                                                                                                                                                | Regionalne Centrum Krwiodawstwa i Krwiolecznictwa w Białymstoku Pracownia Diagnostyki Molekularnej wirusa SARS-CoV-2                                                                                                                                                                                                                                                                                                                                                                                                                                                                                                                                                                                             |                                                                                          |
| EPI_ISL_1389035                                                                                                                                                                                                                                                                                                                                                                                                                                                                                                                                 | Respiratory Virus Unit, Microbiology Services Colindale, Public Health England                                                                                                                                                                                                                                                                                                                                                                                                                                                                                                                                                                                                                                   |                                                                                          |
| EPI_ISL_2278513, EPI_ISL_2311648, EPI_ISL_806762                                                                                                                                                                                                                                                                                                                                                                                                                                                                                                | Robert-Bosch-Krankenhaus                                                                                                                                                                                                                                                                                                                                                                                                                                                                                                                                                                                                                                                                                         |                                                                                          |
| EPI_ISL_833312                                                                                                                                                                                                                                                                                                                                                                                                                                                                                                                                  | Rothen Medizinische Laboratorien AG                                                                                                                                                                                                                                                                                                                                                                                                                                                                                                                                                                                                                                                                              |                                                                                          |
| EPI_ISL_1142071, EPI_ISL_1145693, EPI_ISL_1152705, EPI_ISL_1355998, EPI_ISL_1434845, EPI_ISL_1568053, EPI_ISL_1847784, EPI_ISL_2112654, EPI_ISL_1081786                                                                                                                                                                                                                                                                                                                                                                                         | Rothen Medizinische Laboratorien AG                                                                                                                                                                                                                                                                                                                                                                                                                                                                                                                                                                                                                                                                              |                                                                                          |
| EPI_ISL_1393515, EPI_ISL_2132822, EPI_ISL_2132836, EPI_ISL_2132891, EPI_ISL_2510344, EPI_ISL_2510445, EPI_ISL_2510450, EPI_ISL_2510477, EPI_ISL_2510478, EPI_ISL_2510491, EPI_ISL_2510524                                                                                                                                                                                                                                                                                                                                                       | SELAS BIOLAB AVENIR                                                                                                                                                                                                                                                                                                                                                                                                                                                                                                                                                                                                                                                                                              |                                                                                          |
| see above                                                                                                                                                                                                                                                                                                                                                                                                                                                                                                                                       | SIESP CHIETI - DRIVE IN ORTONA                                                                                                                                                                                                                                                                                                                                                                                                                                                                                                                                                                                                                                                                                   |                                                                                          |
| EPI_ISL_1588941, EPI_ISL_2322395, EPI_ISL_2404889                                                                                                                                                                                                                                                                                                                                                                                                                                                                                               | SIESP CHIETI- DRIVE IN CHIETI                                                                                                                                                                                                                                                                                                                                                                                                                                                                                                                                                                                                                                                                                    |                                                                                          |
| EPI_ISL_1589642, EPI_ISL_2271068, EPI_ISL_2271085, EPI_ISL_2271104, EPI_ISL_2271297                                                                                                                                                                                                                                                                                                                                                                                                                                                             | SYNLAB Jena Oncoscreen                                                                                                                                                                                                                                                                                                                                                                                                                                                                                                                                                                                                                                                                                           |                                                                                          |
|                                                                                                                                                                                                                                                                                                                                                                                                                                                                                                                                                 | SYNLAB MVZ Leinfelden-Echterdingen                                                                                                                                                                                                                                                                                                                                                                                                                                                                                                                                                                                                                                                                               |                                                                                          |
|                                                                                                                                                                                                                                                                                                                                                                                                                                                                                                                                                 | San Diego County Public Health Laboratory                                                                                                                                                                                                                                                                                                                                                                                                                                                                                                                                                                                                                                                                        |                                                                                          |
|                                                                                                                                                                                                                                                                                                                                                                                                                                                                                                                                                 | Servicio de Microbiología Clínica (Complejo Hospitalario de Navarra, Pamplona)                                                                                                                                                                                                                                                                                                                                                                                                                                                                                                                                                                                                                                   |                                                                                          |
|                                                                                                                                                                                                                                                                                                                                                                                                                                                                                                                                                 | Servicio de Microbiología, Hospital Miguel Servet, Zaragoza                                                                                                                                                                                                                                                                                                                                                                                                                                                                                                                                                                                                                                                      |                                                                                          |
|                                                                                                                                                                                                                                                                                                                                                                                                                                                                                                                                                 | Public Health Wales Microbiology Cardiff Wales Specialist Virology Centre                                                                                                                                                                                                                                                                                                                                                                                                                                                                                                                                                                                                                                        |                                                                                          |
|                                                                                                                                                                                                                                                                                                                                                                                                                                                                                                                                                 | Alec Birchley; Alexander Adams; Amy Gaskin; Angela Marchbank; Bree Gatica-Wilcox; Catherine Moore; Jason Coombes; Joanne Watkins; Joel Southgate; Johnathan Evans; Laura Gifford; Lauren Gilbert; Lee Graham; Malorie Perry; Matthew Bull; Nicole Pacchiarini; Sally Corden; Sara Kumziene-Summerhayes; Sara Rey; Sarah Taylor; Simon Cottrell; Sophie Jones; Tom Connor                                                                                                                                                                                                                                                                                                                                         |                                                                                          |
|                                                                                                                                                                                                                                                                                                                                                                                                                                                                                                                                                 | Norwegian Institute of Public Health, Department of Virology                                                                                                                                                                                                                                                                                                                                                                                                                                                                                                                                                                                                                                                     |                                                                                          |
|                                                                                                                                                                                                                                                                                                                                                                                                                                                                                                                                                 | Istituto Zooprofilattico Sperimentale dell'Abruzzo e Molise "G. Caporale"                                                                                                                                                                                                                                                                                                                                                                                                                                                                                                                                                                                                                                        |                                                                                          |
|                                                                                                                                                                                                                                                                                                                                                                                                                                                                                                                                                 | Norwegian Institute of Public Health, Department of Virology                                                                                                                                                                                                                                                                                                                                                                                                                                                                                                                                                                                                                                                     |                                                                                          |
|                                                                                                                                                                                                                                                                                                                                                                                                                                                                                                                                                 | COVID-19 Genomics UK (COG-UK) Consortium                                                                                                                                                                                                                                                                                                                                                                                                                                                                                                                                                                                                                                                                         |                                                                                          |
|                                                                                                                                                                                                                                                                                                                                                                                                                                                                                                                                                 | Laboratory of genomics and metagenomics                                                                                                                                                                                                                                                                                                                                                                                                                                                                                                                                                                                                                                                                          |                                                                                          |
|                                                                                                                                                                                                                                                                                                                                                                                                                                                                                                                                                 | Pasteur Institute - Laboratory of Clinical Virology                                                                                                                                                                                                                                                                                                                                                                                                                                                                                                                                                                                                                                                              |                                                                                          |
|                                                                                                                                                                                                                                                                                                                                                                                                                                                                                                                                                 | Bergthaler laboratory, CeMM Research Center for Molecular Medicine of the Austrian Academy of Sciences                                                                                                                                                                                                                                                                                                                                                                                                                                                                                                                                                                                                           |                                                                                          |
|                                                                                                                                                                                                                                                                                                                                                                                                                                                                                                                                                 | Philippine Genome Center                                                                                                                                                                                                                                                                                                                                                                                                                                                                                                                                                                                                                                                                                         |                                                                                          |
|                                                                                                                                                                                                                                                                                                                                                                                                                                                                                                                                                 | Alex thea R. de Guzman; Anna Ong-Lim; Arianne A. Zamora; Asia Louisa U. Chong; Benedict A. Maralit; Candice Francheska B. Tambaoan; Carlo M. Lapid; Celia Carlos; Devon Ray Pacial; Edsel Maurice Salvaña; El King D. Morado; Eva Maria Cutiongco-de la Paz; Francis A. Tablizo; Irish Coleen A. Asin; Jaime C. Montoya; Jan Michael C. Yap; Jo-Hannah S. Llames; John Q. Wong; Joshua Gregor A. Dizon; Juan Antonio R. Magalang; Karol Sophia Agape R. Padilla; Kenneth M. Kim; Kris P. Punayan; Marc Edsel C. Ayes; Marc Jerrone R. Castro; Maria Rosario Singh-Vergeire and Cynthia P. Saloma; Maria Sofia L. Yangzon; Marissa Alejandria; Razel Nikka M. Haeo; Rianna Patricia S. Cruz; Sheila Mae M. Araiza |                                                                                          |
|                                                                                                                                                                                                                                                                                                                                                                                                                                                                                                                                                 | Protzer Lab                                                                                                                                                                                                                                                                                                                                                                                                                                                                                                                                                                                                                                                                                                      |                                                                                          |
|                                                                                                                                                                                                                                                                                                                                                                                                                                                                                                                                                 | Protzer Lab, Laboratory for Functional Genome Analysis, Dept. Genomics, Gene Center of the LMU Munich                                                                                                                                                                                                                                                                                                                                                                                                                                                                                                                                                                                                            |                                                                                          |
|                                                                                                                                                                                                                                                                                                                                                                                                                                                                                                                                                 | Protzer Lab, Gagneur Lab, Robert Koch Institut                                                                                                                                                                                                                                                                                                                                                                                                                                                                                                                                                                                                                                                                   |                                                                                          |
|                                                                                                                                                                                                                                                                                                                                                                                                                                                                                                                                                 | Public Health Authority of the Slovak Republic                                                                                                                                                                                                                                                                                                                                                                                                                                                                                                                                                                                                                                                                   |                                                                                          |
|                                                                                                                                                                                                                                                                                                                                                                                                                                                                                                                                                 | COVID-19 Genomics UK (COG-UK) Consortium                                                                                                                                                                                                                                                                                                                                                                                                                                                                                                                                                                                                                                                                         |                                                                                          |
|                                                                                                                                                                                                                                                                                                                                                                                                                                                                                                                                                 | COVID-19 Genomics UK (COG-UK) Consortium                                                                                                                                                                                                                                                                                                                                                                                                                                                                                                                                                                                                                                                                         |                                                                                          |
|                                                                                                                                                                                                                                                                                                                                                                                                                                                                                                                                                 | 1. National Institute of Public Health - National Institute of Hygiene; 2. Eurofins Genomics Europe Sequencing GmbH                                                                                                                                                                                                                                                                                                                                                                                                                                                                                                                                                                                              |                                                                                          |
|                                                                                                                                                                                                                                                                                                                                                                                                                                                                                                                                                 | COVID-19 Genomics UK (COG-UK) Consortium                                                                                                                                                                                                                                                                                                                                                                                                                                                                                                                                                                                                                                                                         |                                                                                          |
|                                                                                                                                                                                                                                                                                                                                                                                                                                                                                                                                                 | Robert Koch Institute                                                                                                                                                                                                                                                                                                                                                                                                                                                                                                                                                                                                                                                                                            |                                                                                          |
|                                                                                                                                                                                                                                                                                                                                                                                                                                                                                                                                                 | Robert Koch Institute                                                                                                                                                                                                                                                                                                                                                                                                                                                                                                                                                                                                                                                                                            |                                                                                          |
|                                                                                                                                                                                                                                                                                                                                                                                                                                                                                                                                                 | Andersen lab at Scripps Research                                                                                                                                                                                                                                                                                                                                                                                                                                                                                                                                                                                                                                                                                 |                                                                                          |
|                                                                                                                                                                                                                                                                                                                                                                                                                                                                                                                                                 | Centro de Secuenciación NASERTIC                                                                                                                                                                                                                                                                                                                                                                                                                                                                                                                                                                                                                                                                                 |                                                                                          |
|                                                                                                                                                                                                                                                                                                                                                                                                                                                                                                                                                 | SeqCOVID-SPAIN consortium/IBV(CSIC)                                                                                                                                                                                                                                                                                                                                                                                                                                                                                                                                                                                                                                                                              |                                                                                          |
|                                                                                                                                                                                                                                                                                                                                                                                                                                                                                                                                                 | Claire Bertelli; Damien Jacot; Gilbert Greub; Sébastien Aebys; Trestan Pillonel                                                                                                                                                                                                                                                                                                                                                                                                                                                                                                                                                                                                                                  |                                                                                          |
|                                                                                                                                                                                                                                                                                                                                                                                                                                                                                                                                                 | Anissa Chouikha; Henda Triki; Kais Ghedria; Mariem Gdoura; Sondos Haddad; Wasfi Fares                                                                                                                                                                                                                                                                                                                                                                                                                                                                                                                                                                                                                            |                                                                                          |
|                                                                                                                                                                                                                                                                                                                                                                                                                                                                                                                                                 | Alexander Lercher; Alexandra Popa; Andreas Bergthaler; Anna Schedl; Benedikt Agerer; Christoph Bock; Jakob-Wendelin Genger; Jan Laine; Lukas Endler; Martin Senekowitsch; Michael Schuster; Thomas Penz                                                                                                                                                                                                                                                                                                                                                                                                                                                                                                          |                                                                                          |
|                                                                                                                                                                                                                                                                                                                                                                                                                                                                                                                                                 | Alexander Karollus; Andrea Theumer; Dieter Hoffmann; Eva Schulte; Julien Gagneur; Max von Kleist; Oliver Drechsel; Ulrike Protzer                                                                                                                                                                                                                                                                                                                                                                                                                                                                                                                                                                                |                                                                                          |
|                                                                                                                                                                                                                                                                                                                                                                                                                                                                                                                                                 | Angel Angelov; Christina Engesser; Dieter Hoffmann; Elisabeth Esser; Eva C.Schulte; Julien Gagneur; Michael Sonnabend; Nicholas H.Smith; Till Bunse; Ulrike Protzer                                                                                                                                                                                                                                                                                                                                                                                                                                                                                                                                              |                                                                                          |
|                                                                                                                                                                                                                                                                                                                                                                                                                                                                                                                                                 | Anna Gičová; Barbora Kotvasová; Elena Tichá; Lucia Ševčíková; Miroslav Böhmer; Pavol Mišenko; Terézia Vrabčová; Tomáš Szemes                                                                                                                                                                                                                                                                                                                                                                                                                                                                                                                                                                                     |                                                                                          |
|                                                                                                                                                                                                                                                                                                                                                                                                                                                                                                                                                 | Alexander J Trotter; Alison E. Mather; Alp Aydin; Ana P. Tedim; Anastasia Kolyva; Andrew Bell; Andrew J. Page; Claire Stuart; Dave J. Baker; Gemma L. Kay; John Wain; Justin O'Grady; Leonardo de Oliveira Martins; Lizzie Meadows; Maria Diaz; Mark Webber; Muhammed Yasir; Nabil-Fareed Alikhan; Ngozi Elumogo; Nicholas M. Thomson; Rachael Stanley; Rachel Gilroy; Reenesh Prakash; Samir Dervisevic; Samuel Bloomfield; Steven Rudder; Thanh Le-Viet                                                                                                                                                                                                                                                        |                                                                                          |
|                                                                                                                                                                                                                                                                                                                                                                                                                                                                                                                                                 | Christopher Moore; Fei Sang; Gemma Clark; Hannah Howson-Wells; Johnny Debebe; Jonathan Ball; Joseph Chappell; Manjinder Khakh; Matthew Carlisle; Matthew Loose; Michelle M Lister; Nadine Holmes; Patrick McClure; Theocharis Tsoleiridis; Vicki M Fleming; Victoria Wright; Wendy Smith                                                                                                                                                                                                                                                                                                                                                                                                                         |                                                                                          |
|                                                                                                                                                                                                                                                                                                                                                                                                                                                                                                                                                 | ECDC COVID-19 WGS support team; Eurofins Genomics Europe Sequencing Team; Gierczyński Rafał; Sadkowska-Todys Małgorzata; Wolkowicz Tomasz; Zacharczuk Katarzyna                                                                                                                                                                                                                                                                                                                                                                                                                                                                                                                                                  |                                                                                          |
|                                                                                                                                                                                                                                                                                                                                                                                                                                                                                                                                                 | PHE Covid Sequencing Team                                                                                                                                                                                                                                                                                                                                                                                                                                                                                                                                                                                                                                                                                        |                                                                                          |
|                                                                                                                                                                                                                                                                                                                                                                                                                                                                                                                                                 | Adrian Egli; Alfredo Mari; Fanny Wegner; Hans Hirsch; Helena MB Seth-Smith; Ingrid Steffen; Julia Bielicki; Karoline Leuzinger; Manuel Battegay; Tim Roloff                                                                                                                                                                                                                                                                                                                                                                                                                                                                                                                                                      |                                                                                          |
|                                                                                                                                                                                                                                                                                                                                                                                                                                                                                                                                                 | University Hospital Basel, Clinical Bacteriology                                                                                                                                                                                                                                                                                                                                                                                                                                                                                                                                                                                                                                                                 |                                                                                          |
|                                                                                                                                                                                                                                                                                                                                                                                                                                                                                                                                                 | CHU Purpan - Laboratoire de Virologie - Institut Fédératif de Biologie                                                                                                                                                                                                                                                                                                                                                                                                                                                                                                                                                                                                                                           |                                                                                          |
|                                                                                                                                                                                                                                                                                                                                                                                                                                                                                                                                                 | Istituto Zooprofilattico Sperimentale dell'Abruzzo e Molise "G. Caporale"                                                                                                                                                                                                                                                                                                                                                                                                                                                                                                                                                                                                                                        |                                                                                          |
|                                                                                                                                                                                                                                                                                                                                                                                                                                                                                                                                                 | Istituto Zooprofilattico Sperimentale dell'Abruzzo e Molise "G. Caporale"                                                                                                                                                                                                                                                                                                                                                                                                                                                                                                                                                                                                                                        |                                                                                          |
|                                                                                                                                                                                                                                                                                                                                                                                                                                                                                                                                                 | Robert Koch Institute                                                                                                                                                                                                                                                                                                                                                                                                                                                                                                                                                                                                                                                                                            |                                                                                          |
|                                                                                                                                                                                                                                                                                                                                                                                                                                                                                                                                                 | Robert Koch Institute                                                                                                                                                                                                                                                                                                                                                                                                                                                                                                                                                                                                                                                                                            |                                                                                          |
|                                                                                                                                                                                                                                                                                                                                                                                                                                                                                                                                                 | Brett Austin; Jovan Shepard; SEARCH Alliance San Diego with Tracy Basler                                                                                                                                                                                                                                                                                                                                                                                                                                                                                                                                                                                                                                         |                                                                                          |
|                                                                                                                                                                                                                                                                                                                                                                                                                                                                                                                                                 | Ana Miqueleiz; Ana Navascués; Carmen Ezpeleta Baquedano                                                                                                                                                                                                                                                                                                                                                                                                                                                                                                                                                                                                                                                          |                                                                                          |
|                                                                                                                                                                                                                                                                                                                                                                                                                                                                                                                                                 | Ana Miqueleiz and SeqCOVID-SPAIN consortium; Ana Navascués; Carmen Ezpeleta Baquedano                                                                                                                                                                                                                                                                                                                                                                                                                                                                                                                                                                                                                            |                                                                                          |
|                                                                                                                                                                                                                                                                                                                                                                                                                                                                                                                                                 | SeqCOVID-SPAIN consortium/IBV(CSIC)                                                                                                                                                                                                                                                                                                                                                                                                                                                                                                                                                                                                                                                                              |                                                                                          |
|                                                                                                                                                                                                                                                                                                                                                                                                                                                                                                                                                 | Alexander Trisanchó Baró; Ana Milagro; Antonio Rezusta López; Nieves Martínez Cameo and SeqCOVID-SPAIN consortium; Yolanda Gracia Grataloup                                                                                                                                                                                                                                                                                                                                                                                                                                                                                                                                                                      |                                                                                          |



|                                                                                                                                                                                                                                                                                                                                                                                                                                                                                                                                                                                                                                                                                                                                                                                                                                                                                                                                                                                                                                                                                                                                                                                                                                                                                                                                                                                                                                                                                                                                                                                                       |                                                                                                                                                                                                                                                                                                                                                                                                                 |                                                                                                                                                                                                                                                                                   |                                                                                                                                                                                                                                                                                                                                                                                                                                                                                                                                                                                                                                                                                                                                                                                                                                                                                                                                                                                                                                                            |
|-------------------------------------------------------------------------------------------------------------------------------------------------------------------------------------------------------------------------------------------------------------------------------------------------------------------------------------------------------------------------------------------------------------------------------------------------------------------------------------------------------------------------------------------------------------------------------------------------------------------------------------------------------------------------------------------------------------------------------------------------------------------------------------------------------------------------------------------------------------------------------------------------------------------------------------------------------------------------------------------------------------------------------------------------------------------------------------------------------------------------------------------------------------------------------------------------------------------------------------------------------------------------------------------------------------------------------------------------------------------------------------------------------------------------------------------------------------------------------------------------------------------------------------------------------------------------------------------------------|-----------------------------------------------------------------------------------------------------------------------------------------------------------------------------------------------------------------------------------------------------------------------------------------------------------------------------------------------------------------------------------------------------------------|-----------------------------------------------------------------------------------------------------------------------------------------------------------------------------------------------------------------------------------------------------------------------------------|------------------------------------------------------------------------------------------------------------------------------------------------------------------------------------------------------------------------------------------------------------------------------------------------------------------------------------------------------------------------------------------------------------------------------------------------------------------------------------------------------------------------------------------------------------------------------------------------------------------------------------------------------------------------------------------------------------------------------------------------------------------------------------------------------------------------------------------------------------------------------------------------------------------------------------------------------------------------------------------------------------------------------------------------------------|
| EPI_ISL_1013054,<br>EPI_ISL_1013067                                                                                                                                                                                                                                                                                                                                                                                                                                                                                                                                                                                                                                                                                                                                                                                                                                                                                                                                                                                                                                                                                                                                                                                                                                                                                                                                                                                                                                                                                                                                                                   | Servicio de Microbiología, Laboratori Clínic Metropolitana Nord. Hospital Universitari Germans Trias i Pujol. Institut d'Investigació en Ciències de la Salut Germans Trias i Pujol (IGTP)                                                                                                                                                                                                                      | IrsiCaixa - Can Ruti CovidSeq                                                                                                                                                                                                                                                     | Adrián Antuori; Ana Pérez; Anna Not; Antoni E. Bordoý; Bonaventura Clotet Elisa Martró; Cristina Casañ; Cristina Esteban; Francesc Catala-Moll; Ignacio Blanco; Marc Noguera-Julian; Maria Casadellà; Mariàna Parera; Montserrat Giménez; Pilar Armengol; Roger Paredes; Verónica Saludes                                                                                                                                                                                                                                                                                                                                                                                                                                                                                                                                                                                                                                                                                                                                                                  |
| EPI_ISL_654526, EPI_ISL_660267, EPI_ISL_660281, EPI_ISL_660301, EPI_ISL_855455, EPI_ISL_855470, EPI_ISL_855478, EPI_ISL_855488, EPI_ISL_855490, EPI_ISL_871933<br>see above                                                                                                                                                                                                                                                                                                                                                                                                                                                                                                                                                                                                                                                                                                                                                                                                                                                                                                                                                                                                                                                                                                                                                                                                                                                                                                                                                                                                                           | Servicio de Microbiología, Laboratori Clínic Metropolitana Nord. Hospital Universitari Germans Trias i Pujol. Institut d'Investigació en Ciències de la Salut Germans Trias i Pujol (IGTP)                                                                                                                                                                                                                      | SeqCOVID-SPAIN consortium/IBV(CSIC)                                                                                                                                                                                                                                               | Adrián Antuori; Anabel Fernández; Anna Not; Antoni E. Bordoý; Cristina Casañ and SeqCOVID-SPAIN consortium; Elisa Martró; Nona Romani; Nona Romani and SeqCOVID-SPAIN consortium; Verónica Saludes                                                                                                                                                                                                                                                                                                                                                                                                                                                                                                                                                                                                                                                                                                                                                                                                                                                         |
| EPI_ISL_1716684, EPI_ISL_1970033, EPI_ISL_1970035, EPI_ISL_1970083, EPI_ISL_1970085, EPI_ISL_1970086, EPI_ISL_1970087, EPI_ISL_2081674, EPI_ISL_2081675<br>see above                                                                                                                                                                                                                                                                                                                                                                                                                                                                                                                                                                                                                                                                                                                                                                                                                                                                                                                                                                                                                                                                                                                                                                                                                                                                                                                                                                                                                                  | Servicio de Microbiología. Consorcio Hospital General Universitario de Valencia                                                                                                                                                                                                                                                                                                                                 | SeqCOVID-SPAIN consortium/IBV(CSIC)                                                                                                                                                                                                                                               | Begoña Fuster Escrivá; Carme Salvador García; Concepción Gimeno Cardona and SeqCOVID-SPAIN consortium; María Dolores Ocete; Rafael Medina González                                                                                                                                                                                                                                                                                                                                                                                                                                                                                                                                                                                                                                                                                                                                                                                                                                                                                                         |
| EPI_ISL_1967729, EPI_ISL_1967741, EPI_ISL_1967742, EPI_ISL_1967744, EPI_ISL_1967747<br>EPI_ISL_1109658, EPI_ISL_2100113, EPI_ISL_2100132                                                                                                                                                                                                                                                                                                                                                                                                                                                                                                                                                                                                                                                                                                                                                                                                                                                                                                                                                                                                                                                                                                                                                                                                                                                                                                                                                                                                                                                              | Servicio de Microbiología. Hospital Arnau de Vilanova                                                                                                                                                                                                                                                                                                                                                           | SeqCOVID-SPAIN consortium/IBV(CSIC)                                                                                                                                                                                                                                               | Amparo Farga and SeqCOVID-SPAIN consortium; Rocío Falcón; Victoria Domínguez                                                                                                                                                                                                                                                                                                                                                                                                                                                                                                                                                                                                                                                                                                                                                                                                                                                                                                                                                                               |
| EPI_ISL_1916225, EPI_ISL_1963495, EPI_ISL_1963496, EPI_ISL_1963853, EPI_ISL_1963881, EPI_ISL_1963894, EPI_ISL_1967760, EPI_ISL_2003991, EPI_ISL_2003992, EPI_ISL_2003995, EPI_ISL_2003998, EPI_ISL_2016370<br>see above                                                                                                                                                                                                                                                                                                                                                                                                                                                                                                                                                                                                                                                                                                                                                                                                                                                                                                                                                                                                                                                                                                                                                                                                                                                                                                                                                                               | Servicio de Microbiología. Hospital General Universitario de Castellón                                                                                                                                                                                                                                                                                                                                          | SeqCOVID-SPAIN consortium/IBV(CSIC)                                                                                                                                                                                                                                               | David Navarro Ortega; Eliseo Albert Vicent; Ignacio Torres and SeqCOVID-SPAIN consortium                                                                                                                                                                                                                                                                                                                                                                                                                                                                                                                                                                                                                                                                                                                                                                                                                                                                                                                                                                   |
| EPI_ISL_1963503, EPI_ISL_1963504, EPI_ISL_1963509, EPI_ISL_1963510, EPI_ISL_1963511, EPI_ISL_1963517, EPI_ISL_1963523, EPI_ISL_1963531, EPI_ISL_1963532, EPI_ISL_1963533, EPI_ISL_1963534, EPI_ISL_1963536, EPI_ISL_1963545, EPI_ISL_1963554, EPI_ISL_1963555, EPI_ISL_1963556, EPI_ISL_1967873, EPI_ISL_2100065, EPI_ISL_2135372, EPI_ISL_2135375, EPI_ISL_2135378, EPI_ISL_2135390, EPI_ISL_2135391, EPI_ISL_2135417, EPI_ISL_2439994<br>see above                                                                                                                                                                                                                                                                                                                                                                                                                                                                                                                                                                                                                                                                                                                                                                                                                                                                                                                                                                                                                                                                                                                                                  | Servicio de Microbiología. Hospital Universitario Doctor Peset                                                                                                                                                                                                                                                                                                                                                  | SeqCOVID-SPAIN consortium/IBV(CSIC)                                                                                                                                                                                                                                               | María Dolores Tirado Balaguer and SeqCOVID-SPAIN consortium; Rosario Moreno Muñoz                                                                                                                                                                                                                                                                                                                                                                                                                                                                                                                                                                                                                                                                                                                                                                                                                                                                                                                                                                          |
| EPI_ISL_2465790, EPI_ISL_2465811<br>EPI_ISL_1143250<br>EPI_ISL_1142742<br>EPI_ISL_2156666                                                                                                                                                                                                                                                                                                                                                                                                                                                                                                                                                                                                                                                                                                                                                                                                                                                                                                                                                                                                                                                                                                                                                                                                                                                                                                                                                                                                                                                                                                             | Servicio de Microbiología. Hospital Universitario Donostia. OSI Donostialdea. Área de Enfermedades Infecciosas, Grupo de Infección Respiratoria y Resistencia Antimicrobiana. Instituto de Investigación Sanitaria Biodonostia<br>Sonic - Labor Dr. von Foreich GmbH<br>Sonic - MVZ Medizinisches Labor Bremen GmbH<br>Southern Isabela Medical Center Molecular Diagnostic & Research Laboratory (SIMC - MDRL) | SeqCOVID-SPAIN consortium/IBV(CSIC)                                                                                                                                                                                                                                               | José Miguel Nogueira Coito and SeqCOVID-SPAIN consortium; Juan Alberola Enguldanos; Juan José Camarena Miñana; Rosa González Pellicer                                                                                                                                                                                                                                                                                                                                                                                                                                                                                                                                                                                                                                                                                                                                                                                                                                                                                                                      |
|                                                                                                                                                                                                                                                                                                                                                                                                                                                                                                                                                                                                                                                                                                                                                                                                                                                                                                                                                                                                                                                                                                                                                                                                                                                                                                                                                                                                                                                                                                                                                                                                       |                                                                                                                                                                                                                                                                                                                                                                                                                 | SeqCOVID-SPAIN consortium/IBV(CSIC)                                                                                                                                                                                                                                               | Ane Sorrairan; Gustavo Cilla Eguiluz; Jose Maria Marimón and SeqCOVID-SPAIN consortium; Luis Piñeiro Vázquez; Milagrosa Montes Ros                                                                                                                                                                                                                                                                                                                                                                                                                                                                                                                                                                                                                                                                                                                                                                                                                                                                                                                         |
|                                                                                                                                                                                                                                                                                                                                                                                                                                                                                                                                                                                                                                                                                                                                                                                                                                                                                                                                                                                                                                                                                                                                                                                                                                                                                                                                                                                                                                                                                                                                                                                                       |                                                                                                                                                                                                                                                                                                                                                                                                                 | Robert Koch Institute<br>Robert Koch Institute<br>Philippine Genome Center                                                                                                                                                                                                        | Alethea R. de Guzman; Anna Ong-Lim; Arianne A. Zamora; Asia Louisa U. Chong; Benedict A. Maralit; Candice Francheska B. Tambaoan; Carlo M. Lapid; Celia Carlos; Devon Ray Pacial; Edsel Maurice Salvaña; El King D. Morado; Elcid Aaron R. Pangilinan; Eva Maria Cutiongco-de la Paz; Francis A. Tablizo; Irish Coleen A. Asin; Jaime C. Montoya; Jan Michael C. Yap; Jo-Hannah S. Llamas; John Q. Wong; Joshua Gregor A. Dizon; Juan Antonio R. Magalang; Karol Sophia Agape R. Padilla; Kenneth M. Kim; Kris P. Punayan; Marc Edsel C. Ayes; Marc Jerrone R. Castro; Maria Rosario Singh-Vergeire and Cynthia P. Saloma; Maria Sofia L. Yangzon; Marissa Alejandria; Razel Nikka M. Hao; Rianna Patricia S. Cruz; Sheila Mae M. Araiza                                                                                                                                                                                                                                                                                                                   |
| EPI_ISL_1147444                                                                                                                                                                                                                                                                                                                                                                                                                                                                                                                                                                                                                                                                                                                                                                                                                                                                                                                                                                                                                                                                                                                                                                                                                                                                                                                                                                                                                                                                                                                                                                                       | Städtisches Klinikum Dresden                                                                                                                                                                                                                                                                                                                                                                                    | Robert Koch Institute                                                                                                                                                                                                                                                             |                                                                                                                                                                                                                                                                                                                                                                                                                                                                                                                                                                                                                                                                                                                                                                                                                                                                                                                                                                                                                                                            |
| EPI_ISL_1198341, EPI_ISL_1200033, EPI_ISL_1290543, EPI_ISL_1418731, EPI_ISL_1418733, EPI_ISL_1418748, EPI_ISL_1617456, EPI_ISL_1617540, EPI_ISL_1617547, EPI_ISL_1617906, EPI_ISL_1618382, EPI_ISL_1807545, EPI_ISL_1807595, EPI_ISL_1808178, EPI_ISL_1808575, EPI_ISL_1810683, EPI_ISL_1810695, EPI_ISL_1831791, EPI_ISL_1831826, EPI_ISL_1832060, EPI_ISL_1832062, EPI_ISL_1832150, EPI_ISL_1832390, EPI_ISL_1897831, EPI_ISL_1898194, EPI_ISL_1898223, EPI_ISL_1898276, EPI_ISL_1898339, EPI_ISL_1898593, EPI_ISL_1898716, EPI_ISL_1899503, EPI_ISL_1902492, EPI_ISL_2099074, EPI_ISL_2196373, EPI_ISL_2196395, EPI_ISL_2196396, EPI_ISL_2196420, EPI_ISL_2196425, EPI_ISL_2196436, EPI_ISL_2196446, EPI_ISL_2196455, EPI_ISL_2196462, EPI_ISL_2196466, EPI_ISL_2196484, EPI_ISL_2196485, EPI_ISL_2196487, EPI_ISL_2196488, EPI_ISL_2196489, EPI_ISL_2196490, EPI_ISL_2196491, EPI_ISL_2196493, EPI_ISL_2196494, EPI_ISL_2196499, EPI_ISL_2196512, EPI_ISL_2196515, EPI_ISL_2196518, EPI_ISL_2196603, EPI_ISL_2196644, EPI_ISL_2196656, EPI_ISL_2196678, EPI_ISL_2196680, EPI_ISL_2196683, EPI_ISL_2196723, EPI_ISL_2196733, EPI_ISL_2196744, EPI_ISL_2196747, EPI_ISL_2196749, EPI_ISL_2196755, EPI_ISL_2196761, EPI_ISL_2196764, EPI_ISL_2196769, EPI_ISL_2196782, EPI_ISL_2196791, EPI_ISL_2196792, EPI_ISL_2206208, EPI_ISL_2209928, EPI_ISL_2210680, EPI_ISL_2408740, EPI_ISL_2408755, EPI_ISL_2408811, EPI_ISL_2408907, EPI_ISL_2409069, EPI_ISL_2409135, EPI_ISL_2409367, EPI_ISL_2409412, EPI_ISL_2409491, EPI_ISL_2409600, EPI_ISL_2409735, EPI_ISL_2409754, EPI_ISL_2410837<br>see above | The Public Health Agency of Sweden<br>Institute of Biomedicine and Translational Medicine, University of Tartu<br>SeqCOVID-SPAIN consortium/IBV(CSIC)                                                                                                                                                                                                                                                           | Alma Brolund; Maria Lind Karlberg; Maximilian Riess; Swedish national genomic surveillance program of SARS-CoV-2<br>Aare Abroi; Kristi Huik; Radko Avi; Taavi Päll; Tuuli Reisberg; Ulvi Gerst-Talas<br>Amparo Broseta Tamarit; Carlos Gulin Blanco and SeqCOVID-SPAIN consortium |                                                                                                                                                                                                                                                                                                                                                                                                                                                                                                                                                                                                                                                                                                                                                                                                                                                                                                                                                                                                                                                            |
| EPI_ISL_2391361                                                                                                                                                                                                                                                                                                                                                                                                                                                                                                                                                                                                                                                                                                                                                                                                                                                                                                                                                                                                                                                                                                                                                                                                                                                                                                                                                                                                                                                                                                                                                                                       | Swedish national genomic surveillance program of SARS-CoV-2<br>Synlab                                                                                                                                                                                                                                                                                                                                           | 1. Laboratory of Communicable Diseases (Estonia); 2. Eurofins Genomics Europe Sequencing GmbH                                                                                                                                                                                     | Lidia Dotsenko et al.                                                                                                                                                                                                                                                                                                                                                                                                                                                                                                                                                                                                                                                                                                                                                                                                                                                                                                                                                                                                                                      |
| EPI_ISL_1916161, EPI_ISL_1916170, EPI_ISL_1916180<br>EPI_ISL_1259052, EPI_ISL_1319325, EPI_ISL_1319384, EPI_ISL_1470092, EPI_ISL_2097010, EPI_ISL_2097016<br>EPI_ISL_2505220                                                                                                                                                                                                                                                                                                                                                                                                                                                                                                                                                                                                                                                                                                                                                                                                                                                                                                                                                                                                                                                                                                                                                                                                                                                                                                                                                                                                                          | Synlab - Hospital de Manises<br><br>Synlab Eesti OÜ<br><br>TYKS, Kliininen mikrobiologia                                                                                                                                                                                                                                                                                                                        | Expert Microbiology, National Institute for Health and Welfare<br>deCODE genetics                                                                                                                                                                                                 | Carita Savolainen-Kopra; Erika Lindh; Haider al-Hello; Jani Halkilahti; Kirsi Liitsola; Niina Ikonen; Olli Vapalahti; Pekka Ellonen; Phuoc Truong; Päivi Laurila; Ravi Kant; Sari Hannula; Soile Blomqvist; Teemu Smura<br>Agnar Helgason; Alma Moller; Arna B Agustsdottir; Arnaldur Gylfason; Asgeir Sigurdsson; Aslaug Jonasdottir; Berglind Eiriksdottir; Bjarni Thorbjörnsson; Brynjar O Jensen; Daniel F Gudbjartsson; Droplaug N Magnúsdottir; Elisabet E Gardarsdóttir; Emil A Thorarinn; Gardar Sveinbjörnsson; Gisli Masson; Guðmundur Georgsson; Guðmundur L Norddahl; Guðrun Sigmundsdóttir; Hakon Jonsson; Hannes Eggertsson; Hilma Holm; Ingileif Jonsdottir; Jóna Saemundsdóttir; Kamilla S Josefsdóttir; Kari Stefansson; Karl G Kristinnsson; Kjartan R Guðmundsson; Kristin E Sveinsdóttir; Louise le Roux; Maney Sveinsdóttir; Olafía S Gretarsdóttir; Olafur T Magnússon; Páll Melsted; Patrick Sulem; Run Fridriksdóttir; Solvi Rognvaldsson; Thora R Gunnarsdóttir; Thordur Kristjánsson; Thorolfur Gudnason; Unnur Thorsteinsdottir |
| EPI_ISL_883176, EPI_ISL_883178, EPI_ISL_883187<br>EPI_ISL_977182                                                                                                                                                                                                                                                                                                                                                                                                                                                                                                                                                                                                                                                                                                                                                                                                                                                                                                                                                                                                                                                                                                                                                                                                                                                                                                                                                                                                                                                                                                                                      | UK Tübingen, Medical Microbiology<br><br>ULSS 6 Euganea                                                                                                                                                                                                                                                                                                                                                         | Hannover Medical School, Institute of Virology                                                                                                                                                                                                                                    | Jasper Götting; Lars Steinbrück                                                                                                                                                                                                                                                                                                                                                                                                                                                                                                                                                                                                                                                                                                                                                                                                                                                                                                                                                                                                                            |
| EPI_ISL_1260896                                                                                                                                                                                                                                                                                                                                                                                                                                                                                                                                                                                                                                                                                                                                                                                                                                                                                                                                                                                                                                                                                                                                                                                                                                                                                                                                                                                                                                                                                                                                                                                       | ULSS 7 Pedemontana - Distretto 1                                                                                                                                                                                                                                                                                                                                                                                | Istituto Zooprofilattico Sperimentale delle Venezie                                                                                                                                                                                                                               | Adelaide Milani; Alessia Schivo; Alice Fusaro; Ambra Pastori; Annalisa Salviato; Antonia Ricci; Bianca Zecchin; Calogero Terregino; Erika Giorgia Quaranta; Isabella Monne                                                                                                                                                                                                                                                                                                                                                                                                                                                                                                                                                                                                                                                                                                                                                                                                                                                                                 |
| EPI_ISL_2392072                                                                                                                                                                                                                                                                                                                                                                                                                                                                                                                                                                                                                                                                                                                                                                                                                                                                                                                                                                                                                                                                                                                                                                                                                                                                                                                                                                                                                                                                                                                                                                                       | ULSS 8 Berica                                                                                                                                                                                                                                                                                                                                                                                                   | Istituto Zooprofilattico Sperimentale delle Venezie                                                                                                                                                                                                                               | Adelaide Milani; Alessia Schivo; Alice Fusaro; Ambra Pastori; Annalisa Salviato; Antonia Ricci; Calogero Terregino; Edoardo Giussani; Elisa Palumbo; Erika Giorgia Quaranta; Isabella Monne; Luca Tassoni                                                                                                                                                                                                                                                                                                                                                                                                                                                                                                                                                                                                                                                                                                                                                                                                                                                  |
| EPI_ISL_1402565, EPI_ISL_1402573, EPI_ISL_2230585, EPI_ISL_2230586<br>EPI_ISL_1715102                                                                                                                                                                                                                                                                                                                                                                                                                                                                                                                                                                                                                                                                                                                                                                                                                                                                                                                                                                                                                                                                                                                                                                                                                                                                                                                                                                                                                                                                                                                 | UMC Groningen, Clinical Virology, Department of Medical Microbiology and Infection Prevention<br><br>UOC laboratorio di analisi Istituto Giannina Gaslini                                                                                                                                                                                                                                                       | UMC Groningen, Clinical Virology, Department of Medical Microbiology and Infection Prevention<br><br>TIGEM                                                                                                                                                                        | Alexander Friedrich; Coretta Van Leer-Buter; Erley Lizarazo-Forero; Hubert Niesters; Lilli Gard; Marjolein Knoester; Monika Fliss; Monika Flisskowska; Sigrid Rosema; Xuewei Zhou<br>Antonio Grimaldi Patrizia Annunziata Francesco Panariello Teresa Giuliano Valentina Bouche Chiara Colantuono Lucio Di Filippo Anna Manfredi Marcello Salvi Andrea Ballabio Davide Cacchiarelli                                                                                                                                                                                                                                                                                                                                                                                                                                                                                                                                                                                                                                                                        |
| EPI_ISL_735221, EPI_ISL_735222, EPI_ISL_735224, EPI_ISL_735225, EPI_ISL_735226, EPI_ISL_735227, EPI_ISL_735229, EPI_ISL_735230, EPI_ISL_735231, EPI_ISL_735232, EPI_ISL_735233, EPI_ISL_735234, EPI_ISL_735235<br>see above                                                                                                                                                                                                                                                                                                                                                                                                                                                                                                                                                                                                                                                                                                                                                                                                                                                                                                                                                                                                                                                                                                                                                                                                                                                                                                                                                                           | UZ Leuven, National Reference Laboratory for Coronaviruses, Laboratory Medicine, Leuven, Belgium                                                                                                                                                                                                                                                                                                                | KU Leuven, Rega Institute, Clinical and Epidemiological Virology<br>Robert Koch Institute<br>Robert Koch Institute                                                                                                                                                                | Bert Vanmechelen; Joan Martí-Carreras; Piet Maes; Tony Wawina-Bokalanga                                                                                                                                                                                                                                                                                                                                                                                                                                                                                                                                                                                                                                                                                                                                                                                                                                                                                                                                                                                    |
| EPI_ISL_1846428<br>EPI_ISL_1142093, EPI_ISL_1147561, EPI_ISL_1151780, EPI_ISL_1157246, EPI_ISL_1157275<br>EPI_ISL_708063                                                                                                                                                                                                                                                                                                                                                                                                                                                                                                                                                                                                                                                                                                                                                                                                                                                                                                                                                                                                                                                                                                                                                                                                                                                                                                                                                                                                                                                                              | Uniklinikum Carl Gustav Carus an der TU Dresden; Institut für Virologie<br>Uniklinikum Carl Gustav Carus an der TU Dresden; Institut für Virologie<br><br>Unilabs Laboratory Medicine                                                                                                                                                                                                                           | Norwegian Institute of Public Health, Department of Virology<br>Project group Epidemiology of Highly Pathogenic Microorganisms, Robert Koch-Institute                                                                                                                             | Hilde Elshaug; Hilde Vollan; Kamilla Heddeland Instefjord; Karoline Bragstad; Kathrine Stene-Johansen; Marie Paulsen Madsen; Olav Hungnes; Rasmus Riis Kopperud<br>Andreas Sachse; Ariane Düx; Djin-Ye Oh; Fabian Leendertz; Grit Schubert; Marianne Wedde; Ralf Dürwald; Sébastien Calvignac-Spencer; Thorsten Wolff                                                                                                                                                                                                                                                                                                                                                                                                                                                                                                                                                                                                                                                                                                                                      |
| EPI_ISL_1939063, EPI_ISL_2465747<br>EPI_ISL_2123892, EPI_ISL_2123896, EPI_ISL_2123904, EPI_ISL_2123917,                                                                                                                                                                                                                                                                                                                                                                                                                                                                                                                                                                                                                                                                                                                                                                                                                                                                                                                                                                                                                                                                                                                                                                                                                                                                                                                                                                                                                                                                                               | Universidad de León<br><br>Universitätsklinikum Köln; Institut für Virologie                                                                                                                                                                                                                                                                                                                                    | SeqCOVID-SPAIN consortium/IBV(CSIC)<br><br>Robert Koch Institute                                                                                                                                                                                                                  | Ana Carvajal; Antonio J. Molina and SeqCOVID-SPAIN consortium; Héctor Argüello; Juan M. Fregeneda; Tania Fernández-Villa; Vicente Martín                                                                                                                                                                                                                                                                                                                                                                                                                                                                                                                                                                                                                                                                                                                                                                                                                                                                                                                   |

|                                                                                                                                                                                                                                                                                                                                                                                                                                                                                                                                                                                                                                                                                                      |                                                                                                                                                                                                 |                                                                                                                                    |                                                                                                                                                                                                                                                                                                                                                                                                                                                                                                                                                                                                                                                                                                                                          |
|------------------------------------------------------------------------------------------------------------------------------------------------------------------------------------------------------------------------------------------------------------------------------------------------------------------------------------------------------------------------------------------------------------------------------------------------------------------------------------------------------------------------------------------------------------------------------------------------------------------------------------------------------------------------------------------------------|-------------------------------------------------------------------------------------------------------------------------------------------------------------------------------------------------|------------------------------------------------------------------------------------------------------------------------------------|------------------------------------------------------------------------------------------------------------------------------------------------------------------------------------------------------------------------------------------------------------------------------------------------------------------------------------------------------------------------------------------------------------------------------------------------------------------------------------------------------------------------------------------------------------------------------------------------------------------------------------------------------------------------------------------------------------------------------------------|
| EPI_ISL_2123921, EPI_ISL_2123956                                                                                                                                                                                                                                                                                                                                                                                                                                                                                                                                                                                                                                                                     |                                                                                                                                                                                                 |                                                                                                                                    |                                                                                                                                                                                                                                                                                                                                                                                                                                                                                                                                                                                                                                                                                                                                          |
| EPI_ISL_741275, EPI_ISL_839306, EPI_ISL_839308, EPI_ISL_866194, EPI_ISL_866195, EPI_ISL_866256                                                                                                                                                                                                                                                                                                                                                                                                                                                                                                                                                                                                       | University College London, Great Ormond Street Hospital for Children NHS Foundation Trust, Imperial College Healthcare NHS Trust                                                                | COVID-19 Genomics UK (COG-UK) Consortium                                                                                           | Alison Holmes; Charlotte Williams; Helena Tutill; Jacqueline Findlay; James Price; Judith Breuer; Julianne Brown; Kathryn Harris; Leysa Forrest; Mark Kristiansen; Paola Niola; Paola Resende Silva; Patricia Dyal; Paul Randell; Rachel Williams; Samuel Weeks; Sergi Castellano; Sunando Roy; Tony Brooks; Yasmin Panchbhaya                                                                                                                                                                                                                                                                                                                                                                                                           |
| EPI_ISL_830732, EPI_ISL_830733, EPI_ISL_830734, EPI_ISL_830735, EPI_ISL_930878, EPI_ISL_930912, EPI_ISL_930937, EPI_ISL_930964, EPI_ISL_930979, EPI_ISL_931108, EPI_ISL_931162, EPI_ISL_931180, EPI_ISL_931186, EPI_ISL_931205, EPI_ISL_931234, EPI_ISL_931301, EPI_ISL_931399, EPI_ISL_1388326, EPI_ISL_1388699, EPI_ISL_1388751, EPI_ISL_1388755, EPI_ISL_1388941, EPI_ISL_1389028                                                                                                                                                                                                                                                                                                                 | University Hospital Basel, Clinical Virology                                                                                                                                                    | University Hospital Basel, Clinical Bacteriology                                                                                   | Adrian Egli; Alfredo Mari; Hans Hirsch; Helena MB Seth-Smith; Julia Bielicki; Karoline Leuzinger; Madlen Stange; Manuel Battegay; Tim Roloff                                                                                                                                                                                                                                                                                                                                                                                                                                                                                                                                                                                             |
| EPI_ISL_2333492, EPI_ISL_2491561                                                                                                                                                                                                                                                                                                                                                                                                                                                                                                                                                                                                                                                                     | University Hospital of Northern Norway, Department for Microbiology and Infectious Disease Control                                                                                              | Norwegian Institute of Public Health, Department of Virology                                                                       | 'Kathrine Stene-Johansen; Atiya R Ali; Debec Nadia; Engebretsen Serina Beate; Garcia Llorente Ignacio; Hilde Elshaug; Hilde Volland; Jon Bråte; Kamilla Heddeland Instefjord; Karoline Bragstad; Kathrine Stene-Johansen; Line Victoria Moen; Marie Paulsen Madsen; Olav Hungnes; Pedersen Benedikte Nevjen; Rasmus Riis Kopperud                                                                                                                                                                                                                                                                                                                                                                                                        |
| EPI_ISL_953647                                                                                                                                                                                                                                                                                                                                                                                                                                                                                                                                                                                                                                                                                       | University Hospitals of Geneva, Laboratory of Virology                                                                                                                                          | HUG, Laboratory of Virology and the Health2030 Genome Center                                                                       | Ana Rita Goncalves; Deborah Penet; Emmanouil Dermatzakis; Henri Pegeot; Ioannis Xenarios; Keith Harshman; Laurent Kaiser; Lorenzo Cerutti; Melyssa Elies; Samuel Cordey                                                                                                                                                                                                                                                                                                                                                                                                                                                                                                                                                                  |
| EPI_ISL_960057                                                                                                                                                                                                                                                                                                                                                                                                                                                                                                                                                                                                                                                                                       | University Medical Center Hamburg Eppendorf                                                                                                                                                     | Heinrich Pette Institute, Leibniz Institute for Experimental Virology                                                              | Adam Grundhoff; Alexis Robitaille; Johannes Knobloch; Martin Aepfelbacher; Nicole Fischer; Thomas Günther                                                                                                                                                                                                                                                                                                                                                                                                                                                                                                                                                                                                                                |
| EPI_ISL_577230, EPI_ISL_585561, EPI_ISL_612389, EPI_ISL_612400, EPI_ISL_627327, EPI_ISL_627328, EPI_ISL_997321                                                                                                                                                                                                                                                                                                                                                                                                                                                                                                                                                                                       | University of Exeter                                                                                                                                                                            | COVID-19 Genomics UK (COG-UK) Consortium                                                                                           | Aaron Jeffries; Audrey Farbos; Ben Temperton; Jane Masoli; Joanna Warwick-Dugdale; Michelle Michelsen; Robyn Manley; Stephen Michell                                                                                                                                                                                                                                                                                                                                                                                                                                                                                                                                                                                                     |
| EPI_ISL_930627, EPI_ISL_930628, EPI_ISL_1121214, EPI_ISL_1165864, EPI_ISL_1165868, EPI_ISL_1165871, EPI_ISL_1165873, EPI_ISL_1165875                                                                                                                                                                                                                                                                                                                                                                                                                                                                                                                                                                 | University of Liège COVID-19 testing center                                                                                                                                                     | GIGA Medical Genomics                                                                                                              | Bouchra Boujemla; Cécile Meex; Emmanuel André; Fabrice Bureau; Keith Durkin; Laurent Gillet; Marc Van Ranst; Maria Artesi; Marie-Pierre Hayette; Nathalie Renotte; Sébastien Bontems; Vincent Bours; Wouter Coppieters                                                                                                                                                                                                                                                                                                                                                                                                                                                                                                                   |
| EPI_ISL_1336879                                                                                                                                                                                                                                                                                                                                                                                                                                                                                                                                                                                                                                                                                      | Università degli Studi di Perugia                                                                                                                                                               | Istituto Zooprofilattico Sperimentale dell'Abruzzo e Molise "G. Caporale"                                                          | Ancora M; Calistri P; Camilloni B; Cammà C; Caporale M; Curini V; Di Domenico M; Di Pasquale A; Lorusso A; Mangone I; Marcacci M; Mencacci A; Puglia I; Rinaldi A; Savini G; Scialabba S                                                                                                                                                                                                                                                                                                                                                                                                                                                                                                                                                 |
| EPI_ISL_1154869<br>EPI_ISL_1286470                                                                                                                                                                                                                                                                                                                                                                                                                                                                                                                                                                                                                                                                   | Universitätsklinikum Frankfurt - Institut für Medizinische Virologie<br>Universitätsklinikum Heidelberg                                                                                         | Robert Koch Institute<br>Robert Koch Institute                                                                                     |                                                                                                                                                                                                                                                                                                                                                                                                                                                                                                                                                                                                                                                                                                                                          |
| EPI_ISL_2315927, EPI_ISL_2315935, EPI_ISL_2315962, EPI_ISL_2315972, EPI_ISL_2315977, EPI_ISL_2315979, EPI_ISL_2316004                                                                                                                                                                                                                                                                                                                                                                                                                                                                                                                                                                                | Universitätsklinikum Köln; Institut für Virologie                                                                                                                                               | Robert Koch Institute                                                                                                              |                                                                                                                                                                                                                                                                                                                                                                                                                                                                                                                                                                                                                                                                                                                                          |
| EPI_ISL_1146858,<br>EPI_ISL_1155977,<br>EPI_ISL_1217906                                                                                                                                                                                                                                                                                                                                                                                                                                                                                                                                                                                                                                              | Universitätsklinikum Leipzig - Institut für Medizinische Mikrobiologie und Virologie virologisches Labor                                                                                        | Robert Koch Institute                                                                                                              |                                                                                                                                                                                                                                                                                                                                                                                                                                                                                                                                                                                                                                                                                                                                          |
| EPI_ISL_1355695<br>EPI_ISL_2367269                                                                                                                                                                                                                                                                                                                                                                                                                                                                                                                                                                                                                                                                   | Universitätsmedizin Mannheim<br>VIDYMED EPALINGES                                                                                                                                               | Robert Koch Institute<br>Laboratory of genomics and metagenomics                                                                   | Claire Bertelli; Damien Jacot; Gilbert Greub; Sébastien Aebys; Trestan Pilonel                                                                                                                                                                                                                                                                                                                                                                                                                                                                                                                                                                                                                                                           |
| EPI_ISL_549087, EPI_ISL_635106, EPI_ISL_2333078, EPI_ISL_2333493, EPI_ISL_2333497, EPI_ISL_2425846, EPI_ISL_2425848, EPI_ISL_2425849, EPI_ISL_2425850, EPI_ISL_2425851, EPI_ISL_2425852, EPI_ISL_2425853                                                                                                                                                                                                                                                                                                                                                                                                                                                                                             | Vestfold Hospital, Toensberg Department of Microbiology                                                                                                                                         | Norwegian Institute of Public Health, Department of Virology                                                                       | 'Kathrine Stene-Johansen; Atiya R Ali; Debec Nadia; Engebretsen Serina Beate; Garcia Llorente Ignacio; Hilde Elshaug; Hilde Synnøve Volland; Hilde Volland; Jon Bråte; Kamilla Heddeland Instefjord; Karoline Bragstad; Kathrine Stene-Johansen; Line Victoria Moen; Marie Paulsen Madsen; Olav Hungnes; Pedersen Benedikte Nevjen; Rasmus Riis Kopperud                                                                                                                                                                                                                                                                                                                                                                                 |
| EPI_ISL_1547518                                                                                                                                                                                                                                                                                                                                                                                                                                                                                                                                                                                                                                                                                      | Vestfold Hospital, Toensberg Department of Microbiology                                                                                                                                         | Norwegian Institute of Public Health, Department of Virology                                                                       | Atiya R Ali; Debec Nadia; Engebretsen Serina Beate; Garcia Llorente Ignacio; Hilde Elshaug; Hilde Volland; Jon Bråte; Kamilla Heddeland Instefjord; Karoline Bragstad; Kathrine Stene-Johansen; Marie Paulsen Madsen; Olav Hungnes; Pedersen Benedikte Nevjen; Rasmus Riis Kopperud                                                                                                                                                                                                                                                                                                                                                                                                                                                      |
| EPI_ISL_729153, EPI_ISL_899117, EPI_ISL_899436, EPI_ISL_899682, EPI_ISL_899698, EPI_ISL_899701, EPI_ISL_899735, EPI_ISL_899849, EPI_ISL_899972, EPI_ISL_1002535, EPI_ISL_1002600, EPI_ISL_1002686, EPI_ISL_1002706, EPI_ISL_1002714, EPI_ISL_1002752, EPI_ISL_1002764, EPI_ISL_1002950, EPI_ISL_1003007, EPI_ISL_1003651, EPI_ISL_1003725, EPI_ISL_1004367, EPI_ISL_1004405,<br>EPI_ISL_1004579, EPI_ISL_1004600, EPI_ISL_1004777, EPI_ISL_1059474, EPI_ISL_1059791, EPI_ISL_1120085, EPI_ISL_1129534, EPI_ISL_1361242, EPI_ISL_1408477, EPI_ISL_1408527, EPI_ISL_1408808, EPI_ISL_1496279, EPI_ISL_1498579, EPI_ISL_1598861, EPI_ISL_1750802, EPI_ISL_1750863, EPI_ISL_2375353                      | Viollier AG                                                                                                                                                                                     | Department of Biosystems Science and Engineering, ETH Zürich                                                                       | Andrea Patrignani; Andrea Cabral de Gouvea; Catharine Aquino; Chaoran Chen; Christian Beisel; Christiane Beckmann; Christoph Noppen; David Dreifuss; Deborah Penet; Doris Popovic; Elodie Burcklen; Emmanouil Dermatzakis; Griffin White; Henri Pegeot; Ina Nissen; Ioannis Xenarios; Ivan Topolsky; Jay Tracy; Katharina Jahn; Keith Harshman; Lara Fuhrmann; Laura Neff; Lennart Opitz; Lorenzo Cerutti; Maria Domenica Moccia; Maurice Redondo; Mirjam Feldkamp; Natascha Santacroce; Niko Beerenwinkel; Noemie Santamaria de Souza; Olivier Kobel; Pedro Ferreira; Philipp Jablonski; Ralph Schlapbach; Rebecca Denes; Sarah Nadeau; Simon Grüter; Sophie Seidel; Susana Posada-Céspedes; Tanja Stadler; Timothy Sykes; Tobias Schär |
| EPI_ISL_1388945                                                                                                                                                                                                                                                                                                                                                                                                                                                                                                                                                                                                                                                                                      | Viollier AG                                                                                                                                                                                     | University Hospital Basel, Clinical Bacteriology                                                                                   | Adrian Egli; Alfredo Mari; Christiane Beckmann; Hans Hirsch; Helena MB Seth-Smith; Julia Bielicki; Karoline Leuzinger; Madlen Stange; Manuel Battegay; Tim Roloff                                                                                                                                                                                                                                                                                                                                                                                                                                                                                                                                                                        |
| EPI_ISL_651425, EPI_ISL_651428                                                                                                                                                                                                                                                                                                                                                                                                                                                                                                                                                                                                                                                                       | Virology Department, Royal Infirmary of Edinburgh, NHS Lothian / School of Biological Sciences, University of Edinburgh / Institute of Genetics and Molecular Medicine, University of Edinburgh | COVID-19 Genomics UK (COG-UK) Consortium                                                                                           | Balcaza C; Colquhoun R; Dewar R; Gallagher M; Hill V; Jackson B; McCrone JT; McHugh M; O'Toole A; Rambaut A; Rooke S; Scher E; Templeton K; Williams TC; Yu X                                                                                                                                                                                                                                                                                                                                                                                                                                                                                                                                                                            |
| EPI_ISL_2450756                                                                                                                                                                                                                                                                                                                                                                                                                                                                                                                                                                                                                                                                                      | Virology Laboratory, Department of Biomedical Sciences and Public Health, University Politecnica delle Marche                                                                                   | Virology and Legal Medicine Laboratories, Department of Biomedical Sciences and Public Health, University Politecnica delle Marche | Adriano Tagliabracci; Chiara Turchi; Federica Alessandrini; Filomena Melchionda; Patrizia Bagnarelli; Sara Caucci; Stefano Menzo; Valerio Onofri                                                                                                                                                                                                                                                                                                                                                                                                                                                                                                                                                                                         |
| EPI_ISL_1855088, EPI_ISL_1855095, EPI_ISL_1855100, EPI_ISL_2036780, EPI_ISL_2036787, EPI_ISL_2036789, EPI_ISL_2036794, EPI_ISL_2036796, EPI_ISL_2036797, EPI_ISL_2036808, EPI_ISL_2036868, EPI_ISL_2036911, EPI_ISL_2362149, EPI_ISL_2362151, EPI_ISL_2362156, EPI_ISL_2362158, EPI_ISL_2362168, EPI_ISL_2362169, EPI_ISL_2362173, EPI_ISL_2362174, EPI_ISL_2362175, EPI_ISL_2362212                                                                                                                                                                                                                                                                                                                 | Virology Laboratory, Scientific Department, Army Medical Center                                                                                                                                 | Virology Laboratory, Scientific Department, Army Medical Center                                                                    | Anella Monte; Anna Anselmo; Antonella Fortunato; Filippo Molinari; Florigio Lista; Francesco Giordani; Gaetano Alfano; Giancarlo Petralito; Giandomenico Cerreto; Giulia Campoli; Lucia Nicosia; Margherita De Santis; Maria Anna Spinelli; Marzia Cavalli; Riccardo De Sanctis; Rossella Brandi; Silvia Fillo; Vanessa Vera Fain                                                                                                                                                                                                                                                                                                                                                                                                        |
| EPI_ISL_1366938, EPI_ISL_1366939, EPI_ISL_1366979, EPI_ISL_1577876, EPI_ISL_1648028, EPI_ISL_1786491, EPI_ISL_1864365, EPI_ISL_1864371, EPI_ISL_1864398, EPI_ISL_2003713, EPI_ISL_2003734, EPI_ISL_2135786, EPI_ISL_2135802, EPI_ISL_2447951, EPI_ISL_2447967, EPI_ISL_2447977, EPI_ISL_2447985                                                                                                                                                                                                                                                                                                                                                                                                      | Virology, Universitätsklinikum des Saarlandes                                                                                                                                                   | Epigenetics, Saarland University                                                                                                   | Jörn Walter; Kathrin Kattler; Markus Vogelgesang; Nastasia Seiwert; Sascha Tierling; Sigrun Smola; Stefan Lohse; Thorsten Pfuhl                                                                                                                                                                                                                                                                                                                                                                                                                                                                                                                                                                                                          |
| EPI_ISL_1239709                                                                                                                                                                                                                                                                                                                                                                                                                                                                                                                                                                                                                                                                                      | Vitalabo Bydgoszcz                                                                                                                                                                              | 1. National Institute of Public Health - National Institute of Hygiene; 2. Eurofins Genomics Europe Sequencing GmbH                | ECDC COVID-19 WGS support team; Eurofins Genomics Europe Sequencing Team; Gierczyński Rafał; Sadkowska-Todys Małgorzata; Wołkowicz Tomasz; Zacharczuk Katarzyna                                                                                                                                                                                                                                                                                                                                                                                                                                                                                                                                                                          |
| EPI_ISL_574145, EPI_ISL_574150, EPI_ISL_585801, EPI_ISL_612132, EPI_ISL_627789, EPI_ISL_639547, EPI_ISL_666230, EPI_ISL_666261, EPI_ISL_680942, EPI_ISL_705442, EPI_ISL_706462, EPI_ISL_706749, EPI_ISL_706783, EPI_ISL_726270, EPI_ISL_726822, EPI_ISL_726285, EPI_ISL_726293, EPI_ISL_726298, EPI_ISL_727025, EPI_ISL_727190, EPI_ISL_742469, EPI_ISL_742636, EPI_ISL_742715, EPI_ISL_742877, EPI_ISL_743142, EPI_ISL_743219, EPI_ISL_764640, EPI_ISL_814595, EPI_ISL_814754, EPI_ISL_814860, EPI_ISL_814896, EPI_ISL_814910, EPI_ISL_814918, EPI_ISL_815071, EPI_ISL_822820, EPI_ISL_822832, EPI_ISL_823331, EPI_ISL_823333, EPI_ISL_823408, EPI_ISL_823784                                       | Wales Specialist Virology Centre Sequencing lab: Pathogen Genomics Unit                                                                                                                         | COVID-19 Genomics UK (COG-UK) Consortium                                                                                           | Alec Birchley; Alexander Adams; Amy Gaskin; Angela Marchbank; Bree Gatica-Wilcox; Catherine Moore; Jason Coombes; Joanne Watkins; Joel Southgate; Johnathan Evans; Laura Gifford; Lauren Gilbert; Lee Graham; Maïorie Perry; Matthew Bull; Nicole Pacchiarini; Sally Corden; Sara Kumziene-Summerhayes; Sara Rey; Sarah Taylor; Simon Cottrell; Sophie Jones; Tom Connor                                                                                                                                                                                                                                                                                                                                                                 |
| EPI_ISL_922579, EPI_ISL_922879, EPI_ISL_1106846, EPI_ISL_1107176, EPI_ISL_1833128, EPI_ISL_1833131, EPI_ISL_1833136, EPI_ISL_1833138, EPI_ISL_1833141, EPI_ISL_1833142, EPI_ISL_1833143, EPI_ISL_1833145, EPI_ISL_1833146, EPI_ISL_1833149, EPI_ISL_1833151, EPI_ISL_1833166                                                                                                                                                                                                                                                                                                                                                                                                                         | Wales Specialist Virology Centre Sequencing lab: Pathogen Genomics Unit                                                                                                                         | Public Health Wales Microbiology Cardiff Wales Specialist Virology Centre                                                          | Alec Birchley; Alexander Adams; Amy Gaskin; Angela Marchbank; Bree Gatica-Wilcox; Catherine Moore; Jason Coombes; Joanne Watkins; Joel Southgate; Johnathan Evans; Laura Gifford; Lauren Gilbert; Lee Graham; Maïorie Perry; Matthew Bull; Nicole Pacchiarini; Sally Corden; Sara Kumziene-Summerhayes; Sara Rey; Sarah Taylor; Simon Cottrell; Sophie Jones; Tom Connor                                                                                                                                                                                                                                                                                                                                                                 |
| EPI_ISL_627361, EPI_ISL_627362, EPI_ISL_627364, EPI_ISL_627367, EPI_ISL_651767                                                                                                                                                                                                                                                                                                                                                                                                                                                                                                                                                                                                                       | West of Scotland Specialist Virology Centre, NHSGGC / MRC-University of Glasgow Centre for Virus Research                                                                                       | COVID-19 Genomics UK (COG-UK) Consortium                                                                                           | Alasdair MacLean; Alice Broos; Ana da Silva Filipe; Antonia Ho; Daniel Mair; David L Robertson; Elihu Aranday-Cortes; Emma Thomson; Guy Mollett; Igor Starinski; James Shepherd; Jenna Nichols; Joseph Hughes; Kathy Li; Kathy Smollett; Kyriaki Nomikou; Lily Tong; Marc Niebel; Matthew Holden; Natasha Jesudason; Natasha Johnson; Patawee Asamaphan; Rachel Blacow; Rajiv Shah; Richard Orton; Rory Gunson; Sarah McDonald; Sharif Shaaban; Sreenu Vattipally; Stephen Carmichael                                                                                                                                                                                                                                                    |
| EPI_ISL_539580, EPI_ISL_539584, EPI_ISL_539585, EPI_ISL_539588, EPI_ISL_539591, EPI_ISL_539598, EPI_ISL_539600, EPI_ISL_539602, EPI_ISL_539606, EPI_ISL_539612, EPI_ISL_539613, EPI_ISL_539614, EPI_ISL_631304, EPI_ISL_631315, EPI_ISL_631344, EPI_ISL_631355, EPI_ISL_631356, EPI_ISL_631368, EPI_ISL_666630, EPI_ISL_666641, EPI_ISL_666650, EPI_ISL_666651, EPI_ISL_718035, EPI_ISL_718063, EPI_ISL_718077, EPI_ISL_718078, EPI_ISL_718101, EPI_ISL_770700, EPI_ISL_770707, EPI_ISL_770708, EPI_ISL_770738, EPI_ISL_770740, EPI_ISL_770741, EPI_ISL_770742, EPI_ISL_770769, EPI_ISL_770771, EPI_ISL_1347493, EPI_ISL_1347528, EPI_ISL_1347574, EPI_ISL_1347739, EPI_ISL_1988342, EPI_ISL_2380677 | ZOTZ KLIMAS MVZ Düsseldorf-Centrum GbR ÜBAG für Labormedizin, Genetik, Zytologie, Pathologie                                                                                                    | Center of Medical Microbiology, Virology, and Hospital Hygiene, University of Duesseldorf                                          | Alexander Diltthey; Andreas Walker; Ashley-Jane Duplessis; Daniel Strelow; Jessica Nicolaï; Jörg Timm; Katrin Hoffmann; Klaus Pfeffer; Lisanna Hülse; Malte Kohns Vasconcelos; Marek Korenack; Maximilian Damagnez; Nadine Lübke; Patrick Finzer; Rainer Zotz; Tobias Wienenmann; Torsten Houwaart                                                                                                                                                                                                                                                                                                                                                                                                                                       |
| EPI_ISL_1281384, EPI_ISL_1351394                                                                                                                                                                                                                                                                                                                                                                                                                                                                                                                                                                                                                                                                     | amedes Göttingen                                                                                                                                                                                | Robert Koch Institute                                                                                                              |                                                                                                                                                                                                                                                                                                                                                                                                                                                                                                                                                                                                                                                                                                                                          |
| EPI_ISL_1850570                                                                                                                                                                                                                                                                                                                                                                                                                                                                                                                                                                                                                                                                                      | amedes MVZ DIAMEDIS Sennestadt                                                                                                                                                                  | Robert Koch Institute                                                                                                              |                                                                                                                                                                                                                                                                                                                                                                                                                                                                                                                                                                                                                                                                                                                                          |
| EPI_ISL_1146243                                                                                                                                                                                                                                                                                                                                                                                                                                                                                                                                                                                                                                                                                      | amedes MVZ Jena                                                                                                                                                                                 | Robert Koch Institute                                                                                                              |                                                                                                                                                                                                                                                                                                                                                                                                                                                                                                                                                                                                                                                                                                                                          |

|                                                                                                                                                                      |                                                                     |                                                             |                                                                                                                                                                                                                                                                                                                                                                                                                                                                                                                                                                                                                                                                                                                                                                                                                                   |
|----------------------------------------------------------------------------------------------------------------------------------------------------------------------|---------------------------------------------------------------------|-------------------------------------------------------------|-----------------------------------------------------------------------------------------------------------------------------------------------------------------------------------------------------------------------------------------------------------------------------------------------------------------------------------------------------------------------------------------------------------------------------------------------------------------------------------------------------------------------------------------------------------------------------------------------------------------------------------------------------------------------------------------------------------------------------------------------------------------------------------------------------------------------------------|
| EPI_ISL_826933,<br>EPI_ISL_827227,<br>EPI_ISL_827401,<br>EPI_ISL_827523,<br>EPI_ISL_827796                                                                           | deCODE genetics                                                     | deCODE genetics                                             | Agnar Helgason; Alma Moller; Arna B Agustsdottir; Arnaldur Gylfason; Asgeir Sigurdsson; Aslaug Jonasdottir; Berglind Eiríksdóttir; Bjarni Thorbjornsson; Brynjar O Jensson; Daniel F Gudbjartsson; Droplaug N Magnusdottir; Elisabet E Gardarsdottir; Emil A Thorarensen; Gardar Sveinbjornsson; Gisli Masson; Gudmundur Georgsson; Gudmundur L Norddahl; Gudrun Sigmundsdottir; Hakon Jonsson; Hannes Eggertsson; Hilma Holm; Ingileif Jonsdottir; Jona Saemundsdottir; Kamilla S Josefsdottir; Kari Stefansson; Karl G Kristinsson; Kjartan R Gudmundsson; Kristin E Sveinsdottir; Louise le Roux; Maney Sveinsdottir; Olafia S Gretarsdottir; Olafur T Magnusson; Pall Melsted; Patrick Sulem; Run Fridriksdottir; Solvi Rognvaldsson; Thora R Gunnarsdottir; Thordur Kristjansson; Thorolfur Gudnason; Unnur Thorsteinsdottir |
| EPI_ISL_1007943, EPI_ISL_1007976, EPI_ISL_1007979, EPI_ISL_1007982, EPI_ISL_1008715, EPI_ISL_1008721, EPI_ISL_1008722, EPI_ISL_1008724, EPI_ISL_1008747<br>see above | genXone SA, Molecular Diagnostics Laboratory / NZOZ                 | genXone SA, Research & Development Laboratory               | Aleksandra Gidlewicz; Anna Brylak-Błaszków; Grzegorz Nowicki; Jakub Grabowski; Karol Szeszko; Maciej Sykułski; Michał Kaszuba; Natalia Drwęska-Matelska; Łukasz Krych                                                                                                                                                                                                                                                                                                                                                                                                                                                                                                                                                                                                                                                             |
| EPI_ISL_1351559<br>EPI_ISL_2445641                                                                                                                                   | nordlab - Partnerschaftspraxis fu?r Laboratoriumsmedizin<br>unknown | Robert Koch Institute<br>Instituto Nacional de Saude (INSA) | Borges et al                                                                                                                                                                                                                                                                                                                                                                                                                                                                                                                                                                                                                                                                                                                                                                                                                      |
