# Supplementary material for: Investigation of a Limited but Explosive COVID-19 Outbreak in a German Secondary School
Source: MDPI journal article supplement (doi:10.3390/v14010087), 2022-01-04
Supplement: s1 [file s1]

view of window front  
room 1

view of window front  
room 2 and 3, class 8.2 and 8.3
